# Supplementary material for: MethBank 3.0: a database of DNA methylomes across a variety of species
Source: PubMed Central journal article supplement — Nucleic Acids Res. 2017 Nov 17;46(Database issue):D288–95. doi: 10.1093/nar/gkx1139 (PMC5753180; doi:10.1093/nar/gkx1139), 2017-11-17
Supplement: gkx1139_supp.pdf [file gkx1139_supp.pdf]

## **Supplementary Material Legends**

Supplementary Figure S1 Bisulfite sequencing data analysis pipeline.

Supplementary Figure S2 450K array data analysis pipeline.

Supplementary Text S1 Description on DNA methylation age prediction.

Supplementary Text S2 Description on Identification of differentially methylated promoter.

Supplementary Table S1 Datasets used in MethBank 3.0.

Supplementary Table S2 the comparison between Age Predictor and two popular approaches.

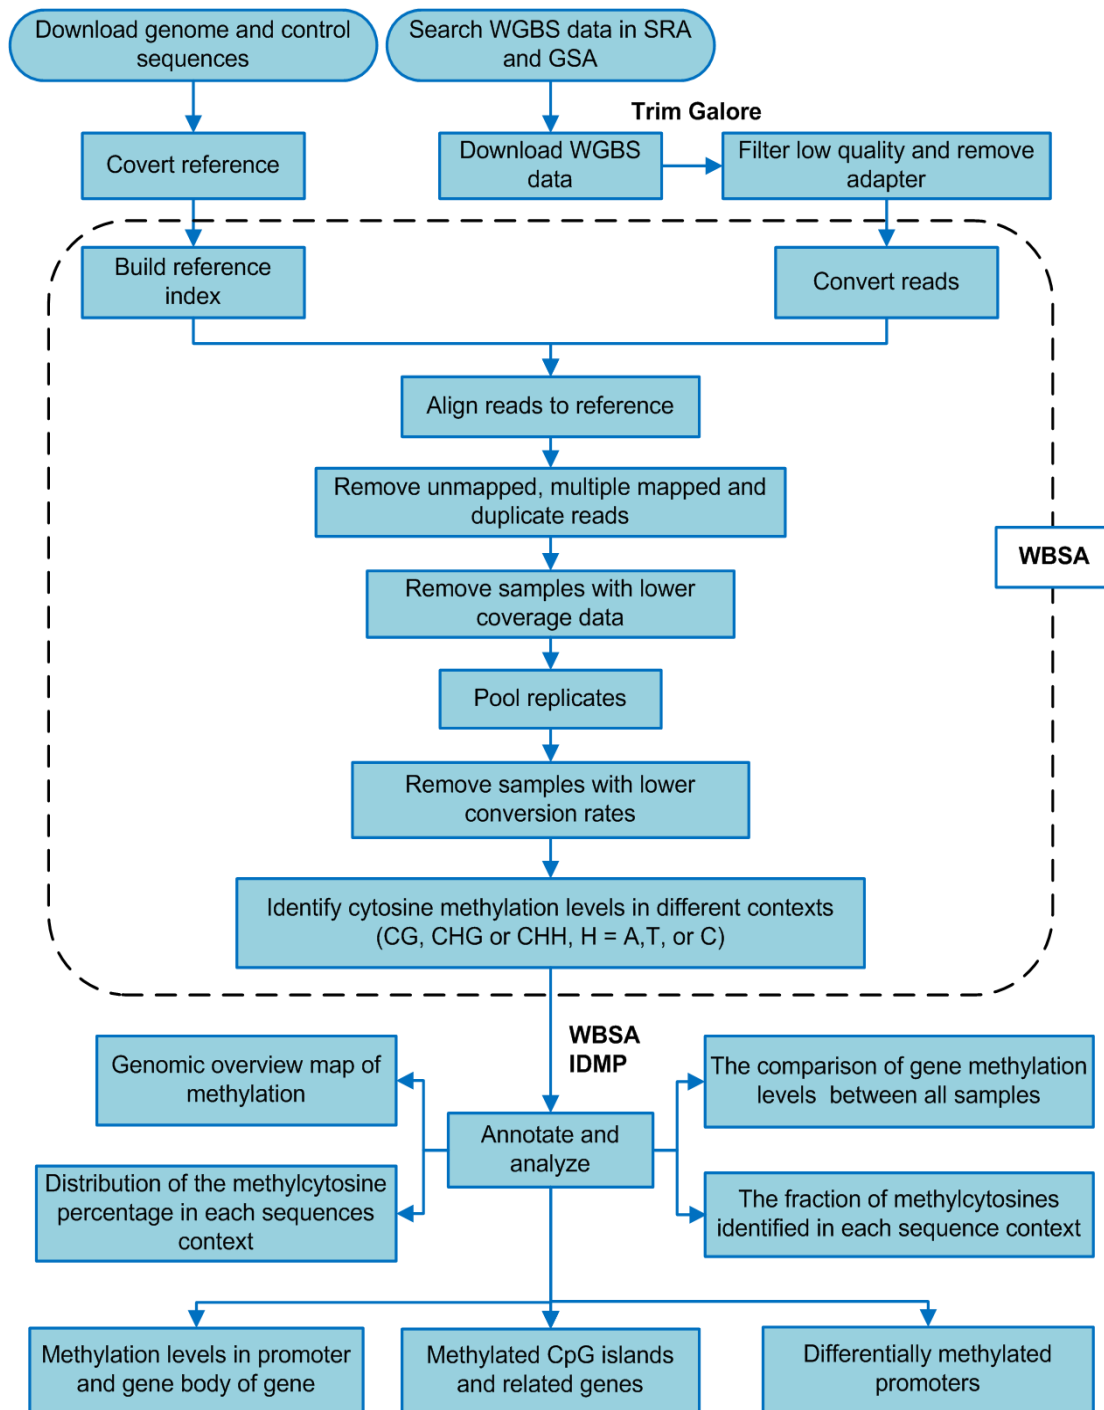

**Supplementary Figure S1 Bisulfite sequencing data analysis pipeline.**

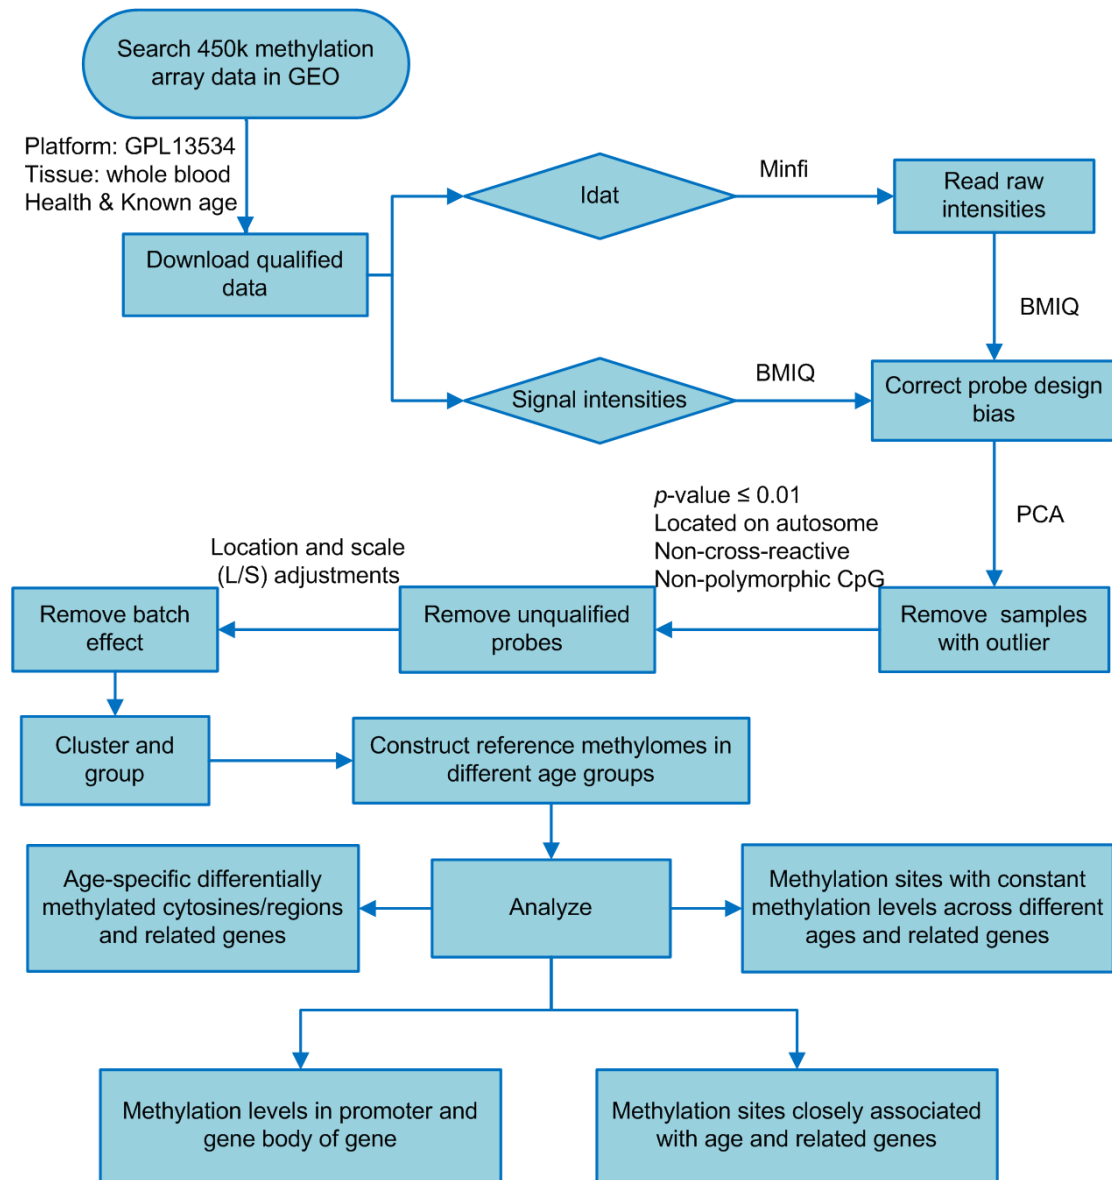

**Supplementary Figure S2 450K array data analysis pipeline.**

## Supplementary Text S1 Description on DNA methylation age prediction.

**Age Predictor** is a tool to predict human DNA methylation age. Based on large-scale human methylation datasets integrated in MethBank 3.0, the age-related CpG sites with linear DNA methylation changes during aging are identified by Spearman correlation ( $|r| > 0.6$ ). As a result, 52 age-related CpG sites (shown below) are selected in terms of their correlation and further employed with three machine learning models (Random Forest, SVM, and Elastic Net) to predict human DNA methylation age. Technically, the random forest algorithm is implemented by the *randomForest* (version 4.6-12) R package (1), where the parameter settings are *ntree* = 500 and *mtry* = 17. The SVM algorithm is implemented by the *e1071* (version 1.6-7) R package with a radial basis function kernel (2), where the parameter settings are *gamma* = 0.0192 and *cost* = 1. For the elastic net, the *glmnet* function is used in *glmnet* (version 2.0-10) R package(3), where the parameters are optimized by tenfold cross-validation using a grid search and the best performance is obtained when setting *alpha* = 0.5 and *lambda* = 0.08. Age Predictor has been integrated into MethBank as an online tool that features straightforward and user-friendly web interfaces and accepts various types of data (raw data, processed data, GEO sample ID) as input.

Table 1 A list of 52 age-related sites.

| Probe      | Chr | Pos       | Gene                        | Gene region feature            | Relationship to CpG Island |
|------------|-----|-----------|-----------------------------|--------------------------------|----------------------------|
| cg01974375 | 1   | 151298954 | PI4KB                       | TSS1500                        | N_Shore                    |
| cg08128734 | 1   | 206685423 | RASSF5;RASSF5               | Body;Body                      | S_Shelf                    |
| cg09809672 | 1   | 236557682 | EDARADD;EDARA<br>DD;EDARADD | TSS1500;5'UTR;1stE<br>xon      | N_Shore                    |
| cg10501210 | 1   | 207997020 |                             |                                |                            |
| cg16008966 | 1   | 114761794 |                             |                                |                            |
| cg16054275 | 1   | 169556022 | F5                          | TSS1500                        |                            |
| cg18933331 | 1   | 110186418 |                             |                                | S_Shore                    |
| cg23078123 | 1   | 68577796  | GPR177                      | Body                           |                            |
| cg25410668 | 1   | 28241577  | RPA2                        | TSS1500                        | S_Shore                    |
| cg06639320 | 2   | 106015739 | FHL2;FHL2;FHL2;F<br>HL2     | TSS200;TSS200;5'U<br>TR;TSS200 | Island                     |
| cg18826637 | 2   | 145116633 |                             |                                |                            |
| cg22454769 | 2   | 106015767 | FHL2;FHL2;FHL2;F<br>HL2     | TSS200;TSS200;5'U<br>TR;TSS200 | Island                     |

|            |    |           |                                 |                               |         |
|------------|----|-----------|---------------------------------|-------------------------------|---------|
| cg24079702 | 2  | 106015771 | FHL2;FHL2;FHL2;FHL2             | TSS200;TSS200;5'UTR;TSS200    | Island  |
| cg00329615 | 3  | 118706648 | IGSF11;IGSF11                   | Body;Body                     |         |
| cg00481951 | 3  | 187387650 | SST                             | Body                          | N_Shore |
| cg07553761 | 3  | 160167977 | TRIM59                          | TSS1500                       | Island  |
| cg12934382 | 3  | 51741135  | GRM2;GRM2;GRM2;GRM2             | 1stExon;5'UTR;1stExon;5'UTR   | Island  |
| cg08262002 | 4  | 16575323  | LDB2;LDB2                       | Body;Body                     |         |
| cg11970349 | 4  | 8582287   | GPR78                           | TSS200                        | Island  |
| cg23500537 | 5  | 140419819 |                                 |                               |         |
| cg16867657 | 6  | 11044877  | ELOVL2                          | TSS1500                       | Island  |
| cg21572722 | 6  | 11044894  | ELOVL2                          | TSS1500                       | Island  |
| cg22736354 | 6  | 18122719  | NHLRC1                          | 1stExon                       | Island  |
| cg24724428 | 6  | 11044888  | ELOVL2                          | TSS1500                       | Island  |
| cg26350754 | 6  | 33043868  | HLA-DPB1                        | 1stExon                       |         |
| cg00292135 | 7  | 156433068 | C7orf13;RNF32                   | Body;TSS1500                  | Island  |
| cg03473532 | 7  | 131008743 | MKLN1                           | Body                          | N_Shelf |
| cg14361627 | 7  | 130419116 | KLF14                           | TSS1500                       | Island  |
| cg26290632 | 8  | 91094847  | CALB1                           | 1stExon                       |         |
| cg10804656 | 10 | 22623460  |                                 |                               | Island  |
| cg11705975 | 10 | 120354248 | PRLHR                           | Body                          | Island  |
| cg22796704 | 10 | 49673534  | ARHGAP22                        | Body                          | N_Shore |
| cg08160331 | 11 | 75140865  | KLHL35                          | 1stExon                       | Island  |
| cg11741201 | 11 | 35638398  | FJX1                            | TSS1500                       | N_Shore |
| cg00748589 | 12 | 11653486  |                                 |                               | Island  |
| cg01528542 | 12 | 81468232  |                                 |                               | N_Shelf |
| cg01820374 | 12 | 6882083   | LAG3                            | Body                          | N_Shore |
| cg11649376 | 12 | 81473234  | ACSS3                           | Body                          | S_Shore |
| cg18215449 | 12 | 66089473  |                                 |                               |         |
| cg04875128 | 15 | 31775895  | OTUD7A                          | Body                          | Island  |
| cg06279276 | 16 | 67184164  | B3GNT9                          | Body                          | Island  |
| cg07082267 | 16 | 85429035  |                                 |                               |         |
| cg06874016 | 17 | 40177415  | NKIRAS2;NKIRAS2;NKIRAS2;NKIRAS2 | 3'UTR;3'UTR;3'UTR;3'UTR;3'UTR |         |
| cg18618815 | 17 | 48275324  | COL1A1                          | Body                          | N_Shore |
| cg20273670 | 17 | 21356245  |                                 |                               | Island  |
| cg22156456 | 17 | 39844239  | EIF1                            | TSS1500                       | N_Shore |
| cg16762684 | 18 | 74820493  | MBP;MBP                         | 5'UTR;5'UTR                   | N_Shelf |
| cg19283806 | 18 | 66389420  | CCDC102B                        | 5'UTR                         |         |
| cg14556683 | 19 | 15342982  | EPHX3;EPHX3                     | 1stExon;Body                  | Island  |
| cg17110586 | 19 | 36454623  |                                 |                               | S_Shelf |
| cg07547549 | 20 | 44658225  | SLC12A5;SLC12A5                 | Body;Body                     | Island  |
| cg11436113 | 20 | 19191145  |                                 |                               | N_Shore |

## References

1. Liaw, A. and Wiener, M. (2002) Classification and regression by randomForest. *R news*, **2**, 18-22.
2. Dimitriadou, E., Hornik, K., Leisch, F., Meyer, D. and Weingessel, A. (2005) Misc Functions of the Department of Statistics (e1071), TU Wien. *R package version*, 1.5-7.
3. Friedman, J., Hastie, T. and Tibshirani, R. (2009) glmnet: Lasso and elastic-net regularized generalized linear models. *R package version*, **1**.

## **Supplementary Text S2 Description on Identification of differentially methylated promoter.**

**IDMP** (Identification of Differentially Methylated Promoter) is a tool developed for identifying differentially methylated promoters (DMP) between any two samples. The identification procedure is detailed below. First, a Fisher's exact test is performed on the condition that the delta methylation levels of the promoters between two samples are greater than a specified threshold. For this test, a contingency table is constructed for each promoter region, where the row indicates a particular sample and the column indicates the total number of reads that supports methylated or unmethylated cytosines within this region for a given sample. Second, the Benjamini-Hochberg False Discovery Rate (FDR) correction for the  $p$ -values of Fisher's exact test is used. Finally, the promoter methylation of gene associated with DMP is provided. Users can directly download IDMP from the home webpage of MethBank and identify DMPs by providing two genome methylation files (*BED* format) of interested samples and the gene annotation file (*GFF3* format) and setting the parameters (which include cytosine sequence context (C, CG or CH), the relative start position of promoters to TSS, delta methylation level, and  $p$ -value, etc).

**Supplementary Table S1. Datasets used in MethBank 3.0.**

| Species                 | Accession ID  | Data Type | Experiment name/Age   |
|-------------------------|---------------|-----------|-----------------------|
| <i>Danio rerio</i> (9)  | SRX273739     | WGBS      | Sperm                 |
|                         | SRX273740     |           | Oocyte                |
|                         | SRX273741     |           | 16-cell               |
|                         | SRX273742     |           | 32-cell               |
|                         | SRX273743     |           | 64-cell               |
|                         | SRX273744     |           | 128-cell              |
|                         | SRX273745     |           | MBT                   |
|                         | SRX273746     |           | Gastrulation          |
|                         | SRX273747     |           | Testicle              |
| <i>Mus musculus</i> (9) | SRX542443     | WGBS      | Oocyte                |
|                         | SRX542444     |           | Sperm                 |
|                         | SRX542445     |           | 2-cell                |
|                         | SRX542446     |           | 4-cell                |
|                         | SRX542447     |           | ICM                   |
|                         | SRX542448     |           | E6.5                  |
|                         | SRX542449     |           | E7.5                  |
|                         | SRX542450     |           | E13.5f                |
|                         | SRX542451     |           | E13.5m                |
| <i>Glycine max</i> (38) | SRX200136     | WGBS      | Leaf_LD00-2817P       |
|                         | SRX200137     |           | Leaf_LDX01-1-165      |
|                         | SRX147554     |           | SeedCoat_EM           |
|                         | SRX147555     |           | EmbryCot_EM           |
|                         | SRX147556     |           | EmbryAxis_EM          |
|                         | SRX189099     |           | SeedCoat_MM           |
|                         | SRX189100     |           | EmbryCot_MM           |
|                         | SRX200007     |           | EmbryAxis_MM          |
|                         | SRX545985     |           | SeedCoat_COT          |
|                         | SRX545986     |           | EmbryCot_COT          |
|                         | SRX545987     |           | EmbryAxis_COT         |
|                         | SRX546004     |           | SeedCoatPalisade_EM   |
|                         | SRX546005     |           | SeedCoatParenchyma_EM |
|                         | SRX113250     |           | Seed_GLOB             |
|                         | SRX547135     |           | Seed_COT              |
|                         | SRX113251     |           | Seed_EM               |
|                         | SRX113252     |           | Seed_MM               |
|                         | SRX113254     |           | Seed_LM               |
|                         | SRX1054157    |           |                       |
|                         | SRX1054158    |           |                       |
|                         | SRX113255     |           | Seed_DRY              |
|                         | SRX1054154    |           |                       |
|                         | SRX189123     |           | SDLG                  |
|                         | SRX1054159    |           |                       |
|                         | SRX1054160    |           |                       |
|                         | SRX189124     |           | Cotyledon_SDLG        |
|                         | SRX1054161    |           |                       |
|                         | SRX1054162    |           |                       |
|                         | SRX739593     |           | Leaf_trifoliolate     |
|                         | SRX742794     |           |                       |
|                         | SRX742996     |           | Root_hair             |
|                         | SRX743011     |           |                       |
| SRX742870               | Root_stripped |           |                       |
| SRX742965               |               |           |                       |



|                              |            |      |                          |
|------------------------------|------------|------|--------------------------|
|                              | SRX113929  |      | Root_14d_germ            |
|                              | SRX113930  |      | Stem_14d_germ            |
|                              | SRX113931  |      | Leaf_14d_germ            |
|                              | SRX113932  |      | Cotyledon_14d_germ       |
| <i>Manihot esculenta</i> (4) | SRX1297897 | WGBS | Leaf_7.5w                |
|                              | SRX1297898 |      |                          |
|                              | SRX1297899 |      |                          |
|                              | SRX1656923 |      | Leaf                     |
| <i>Oryza sativa</i> (93)     | CRX006604  | WGBS | Seed_DRY                 |
|                              | CRX006605  |      |                          |
|                              | CRX006606  |      | Seed_12h                 |
|                              | CRX006607  |      |                          |
|                              | CRX006608  |      | Seed_SD LG               |
|                              | CRX006609  |      |                          |
|                              | SRX612561  |      | Shoot_11d_WT             |
|                              | SRX612562  |      | Shoot_11d_Mm             |
|                              | SRX612563  |      | Shoot_11d_mm             |
|                              | SRX205347  |      | Leaf_3w_WT2003           |
|                              | SRX205348  |      | Leaf_3w_WT2007           |
|                              | SRX205349  |      | Leaf_3w_WT2011           |
|                              | SRX205350  |      | Leaf_3w_T2-PiZt-11-R     |
|                              | SRX205351  |      | Leaf_3w_T2-PiZt-11-S     |
|                              | SRX205352  |      | Leaf_3w_T4-PiZt-11-R     |
|                              | SRX205353  |      | Leaf_3w_T4-PiZt-11-S     |
|                              | SRX205354  |      | Leaf_3w_T6-PiZt-11-R     |
|                              | SRX205355  |      | Leaf_3w_T6-Pi9-R         |
|                              | SRX205356  |      | Leaf_3w_T6-Spin1i-1-R    |
|                              | SRX205357  |      | Leaf_3w_T2-PiZt-839-8-R  |
|                              | SRX205358  |      | Leaf_3w_T2-PiZt-839-8-S  |
|                              | SRX205359  |      | Callus_WT                |
|                              | SRX205360  |      |                          |
|                              | SRX205361  |      | Leaf_3w_WT_regenerated   |
|                              | SRX205362  |      |                          |
|                              | SRX205363  |      |                          |
|                              | SRX205364  |      | Leaf_3w_WT2011_replicate |
|                              | SRX374404  |      | Root_7d-Pi               |
|                              | SRX374405  |      |                          |
|                              | SRX374406  |      |                          |
|                              | SRX374401  |      | Root_7d+Pi               |
|                              | SRX374402  |      |                          |
|                              | SRX374403  |      |                          |
|                              | SRX374422  |      | Root_21d-Pi              |
|                              | SRX374423  |      |                          |
|                              | SRX374424  |      |                          |
|                              | SRX374407  |      | Root_21d+Pi              |
|                              | SRX374408  |      |                          |
|                              | SRX374409  |      |                          |
|                              | SRX374416  |      | Root_21d-Pi_1d+Pi        |
|                              | SRX374417  |      |                          |
|                              | SRX374418  |      |                          |
|                              | SRX374398  |      | Root_21d-Pi_3d+Pi        |
|                              | SRX374399  |      |                          |
|                              | SRX374400  |      |                          |
|                              | SRX374413  |      | Root_22d-Pi              |
|                              | SRX374414  |      |                          |
|                              | SRX374415  |      |                          |

|                                  |            |                               |                 |
|----------------------------------|------------|-------------------------------|-----------------|
| SRX374410                        |            | Root_22d+Pi                   |                 |
| SRX374411                        |            |                               |                 |
| SRX374412                        |            |                               |                 |
| SRX374419                        |            | Root_24d-Pi                   |                 |
| SRX374420                        |            |                               |                 |
| SRX374421                        |            |                               |                 |
| SRX374395                        |            | Root_24d+Pi                   |                 |
| SRX374396                        |            |                               |                 |
| SRX374397                        |            |                               |                 |
| SRX657225                        |            | Root_52d-Pi                   |                 |
| SRX657226                        |            |                               |                 |
| SRX657227                        |            |                               |                 |
| SRX657228                        |            | Root_52d+Pi                   |                 |
| SRX657229                        |            |                               |                 |
| SRX657230                        |            |                               |                 |
| SRX657231                        |            | Root_52d_Re                   |                 |
| SRX657232                        |            |                               |                 |
| SRX657233                        |            |                               |                 |
| SRX374428                        |            | Shoot_21d-Pi                  |                 |
| SRX374429                        |            |                               |                 |
| SRX374430                        |            |                               |                 |
| SRX374425                        |            | Shoot_21d+Pi                  |                 |
| SRX374426                        |            |                               |                 |
| SRX374427                        |            |                               |                 |
| SRX657234                        |            | Panicle_52d-Pi                |                 |
| SRX657235                        |            |                               |                 |
| SRX657236                        |            |                               |                 |
| SRX657237                        |            | Panicle_52d+Pi                |                 |
| SRX657238                        |            |                               |                 |
| SRX657239                        |            |                               |                 |
| SRX657240                        |            | Panicle_52d_Re                |                 |
| SRX657241                        |            |                               |                 |
| SRX657242                        |            |                               |                 |
| SRX1121997                       |            | Progeny_of_non-starved_parent |                 |
| SRX1121998                       |            |                               |                 |
| SRX1121999                       |            |                               |                 |
| SRX1122000                       |            |                               |                 |
| SRX1122001                       |            |                               |                 |
| SRX1121992                       |            | Progeny_of_Pi_starved_parent  |                 |
| SRX1121993                       |            |                               |                 |
| SRX1121994                       |            |                               |                 |
| SRX1121995                       |            |                               |                 |
| SRX1121996                       |            |                               |                 |
| SRX153035                        |            | Leaf_6w                       |                 |
| SRX1131816                       |            | Leaf_12d                      |                 |
| <i>Phaseolus vulgaris</i> (2)    | SRX743034  | WGBS                          | Leaf_18d        |
|                                  | SRX743055  |                               |                 |
| <i>Solanum lycopersicum</i> (11) | SRX098271  | WGBS                          | Fruit_17DPA     |
|                                  | SRX098309  |                               | Fruit_39DPA     |
|                                  | SRX098285  |                               | Fruit_42DPA     |
|                                  | SRX098302  |                               | Fruit_52DPA     |
|                                  | SRX150910  |                               | Fruit_42DPA_Cnr |
|                                  | SRX150917  |                               | Fruit_42DPA_Rin |
|                                  | SRX151216  |                               | Leaf_1m         |
|                                  | SRX151217  |                               |                 |
|                                  | SRX2030487 |                               | Fruit_0d        |

|                            | SRX2030488 |      | Fruit_C7dS1 |
|----------------------------|------------|------|-------------|
|                            | SRX2030489 |      | Fruit_C8d   |
| <i>Homo sapiens</i> (4577) | GSM796661  | 450K | 49          |
|                            | GSM796662  |      | 43          |
|                            | GSM796665  |      | 44          |
|                            | GSM796666  |      | 4           |
|                            | GSM796667  |      | 14          |
|                            | GSM796668  |      | 14          |
|                            | GSM796669  |      | 15          |
|                            | GSM796670  |      | 17          |
|                            | GSM796671  |      | 17          |
|                            | GSM796672  |      | 17          |
|                            | GSM796673  |      | 18          |
|                            | GSM796674  |      | 8           |
|                            | GSM796675  |      | 12          |
|                            | GSM796676  |      | 13          |
|                            | GSM796677  |      | 10          |
|                            | GSM796678  |      | 5           |
|                            | GSM796679  |      | 8           |
|                            | GSM796695  |      | 60          |
|                            | GSM796699  |      | 76          |
|                            | GSM989850  |      | 84          |
|                            | GSM989856  |      | 75          |
|                            | GSM989851  |      | 74          |
|                            | GSM989857  |      | 79          |
|                            | GSM989852  |      | 74          |
|                            | GSM989858  |      | 73          |
|                            | GSM989853  |      | 76          |
|                            | GSM989859  |      | 82          |
|                            | GSM989854  |      | 56          |
|                            | GSM989860  |      | 74          |
|                            | GSM989855  |      | 72          |
|                            | GSM989861  |      | 79          |
|                            | GSM990498  |      | 64          |
|                            | GSM990503  |      | 45          |
|                            | GSM990499  |      | 27          |
|                            | GSM990504  |      | 27          |
|                            | GSM990500  |      | 29          |
|                            | GSM990505  |      | 48          |
|                            | GSM990501  |      | 44          |
|                            | GSM990506  |      | 56          |
|                            | GSM990507  |      | 34          |
|                            | GSM990502  |      | 41          |
|                            | GSM990508  |      | 69          |
|                            | GSM990596  |      | 66          |
|                            | GSM990602  |      | 88          |
|                            | GSM990597  |      | 77          |
|                            | GSM990603  |      | 74          |
|                            | GSM990598  |      | 82          |
|                            | GSM990604  |      | 69          |
|                            | GSM990599  |      | 65          |
|                            | GSM990605  |      | 83          |
|                            | GSM990600  |      | 58          |
|                            | GSM990606  |      | 83          |
|                            | GSM990601  |      | 75          |
|                            | GSM990519  |      | 43          |

|           |    |
|-----------|----|
| GSM989976 | 43 |
| GSM989972 | 50 |
| GSM989977 | 55 |
| GSM989973 | 69 |
| GSM989978 | 54 |
| GSM989974 | 65 |
| GSM989979 | 58 |
| GSM989975 | 47 |
| GSM989980 | 34 |
| GSM990059 | 73 |
| GSM990065 | 76 |
| GSM990060 | 73 |
| GSM990066 | 75 |
| GSM990061 | 74 |
| GSM990067 | 64 |
| GSM990062 | 73 |
| GSM990068 | 67 |
| GSM990063 | 86 |
| GSM990064 | 83 |
| GSM990069 | 88 |
| GSM990037 | 63 |
| GSM990043 | 66 |
| GSM990038 | 77 |
| GSM990044 | 87 |
| GSM990039 | 81 |
| GSM990045 | 68 |
| GSM990040 | 82 |
| GSM990046 | 69 |
| GSM990041 | 69 |
| GSM990047 | 76 |
| GSM990042 | 73 |
| GSM990048 | 69 |
| GSM989938 | 59 |
| GSM989944 | 76 |
| GSM989939 | 62 |
| GSM989945 | 54 |
| GSM989940 | 46 |
| GSM989946 | 59 |
| GSM989941 | 68 |
| GSM989947 | 48 |
| GSM989942 | 74 |
| GSM989948 | 45 |
| GSM989943 | 59 |
| GSM989949 | 62 |
| GSM990325 | 55 |
| GSM990331 | 45 |
| GSM990326 | 53 |
| GSM990332 | 65 |
| GSM990327 | 42 |
| GSM990333 | 59 |
| GSM990328 | 59 |
| GSM990334 | 58 |
| GSM990329 | 50 |
| GSM990335 | 64 |
| GSM990330 | 52 |
| GSM990336 | 61 |

|           |    |
|-----------|----|
| GSM990001 | 86 |
| GSM990464 | 56 |
| GSM990465 | 67 |
| GSM990461 | 57 |
| GSM990466 | 76 |
| GSM990462 | 70 |
| GSM990467 | 89 |
| GSM990463 | 77 |
| GSM990468 | 69 |
| GSM990607 | 70 |
| GSM990612 | 86 |
| GSM990613 | 66 |
| GSM990608 | 64 |
| GSM990614 | 70 |
| GSM990609 | 50 |
| GSM990615 | 89 |
| GSM990610 | 74 |
| GSM990616 | 78 |
| GSM990611 | 69 |
| GSM990617 | 69 |
| GSM990518 | 23 |
| GSM990373 | 41 |
| GSM990379 | 62 |
| GSM990374 | 58 |
| GSM990380 | 56 |
| GSM990375 | 26 |
| GSM990381 | 55 |
| GSM990376 | 61 |
| GSM990382 | 61 |
| GSM990377 | 56 |
| GSM990383 | 58 |
| GSM990378 | 66 |
| GSM990384 | 53 |
| GSM990534 | 30 |
| GSM990535 | 49 |
| GSM990536 | 36 |
| GSM990520 | 47 |
| GSM990525 | 28 |
| GSM990521 | 44 |
| GSM990522 | 37 |
| GSM990523 | 27 |
| GSM990524 | 69 |
| GSM990349 | 48 |
| GSM990355 | 45 |
| GSM990350 | 46 |
| GSM990356 | 52 |
| GSM990351 | 41 |
| GSM990357 | 54 |
| GSM990352 | 59 |
| GSM990358 | 62 |
| GSM990353 | 52 |
| GSM990359 | 62 |
| GSM990354 | 50 |
| GSM990360 | 63 |
| GSM990429 | 79 |
| GSM990434 | 92 |

|           |    |
|-----------|----|
| GSM990430 | 57 |
| GSM990435 | 66 |
| GSM990431 | 76 |
| GSM990436 | 59 |
| GSM990432 | 79 |
| GSM990437 | 76 |
| GSM990433 | 49 |
| GSM990438 | 56 |
| GSM990021 | 76 |
| GSM990025 | 71 |
| GSM990022 | 78 |
| GSM990023 | 82 |
| GSM990026 | 82 |
| GSM990024 | 76 |
| GSM990027 | 83 |
| GSM989961 | 58 |
| GSM989967 | 75 |
| GSM989962 | 58 |
| GSM989968 | 48 |
| GSM989963 | 64 |
| GSM989964 | 73 |
| GSM989969 | 81 |
| GSM989965 | 49 |
| GSM989970 | 72 |
| GSM989966 | 56 |
| GSM989971 | 61 |
| GSM990406 | 85 |
| GSM990412 | 78 |
| GSM990407 | 66 |
| GSM990413 | 53 |
| GSM990408 | 69 |
| GSM990414 | 59 |
| GSM990409 | 84 |
| GSM990415 | 65 |
| GSM990410 | 79 |
| GSM990416 | 61 |
| GSM990411 | 64 |
| GSM990417 | 58 |
| GSM990586 | 77 |
| GSM990592 | 54 |
| GSM990587 | 56 |
| GSM990593 | 66 |
| GSM990588 | 92 |
| GSM990594 | 75 |
| GSM990589 | 78 |
| GSM990595 | 90 |
| GSM990590 | 71 |
| GSM990591 | 89 |
| GSM990049 | 81 |
| GSM990054 | 77 |
| GSM990050 | 71 |
| GSM990055 | 85 |
| GSM990051 | 71 |
| GSM990056 | 70 |
| GSM990052 | 75 |
| GSM990057 | 62 |

|           |    |
|-----------|----|
| GSM990053 | 60 |
| GSM990058 | 69 |
| GSM990575 | 67 |
| GSM990580 | 82 |
| GSM990576 | 85 |
| GSM990581 | 93 |
| GSM990577 | 76 |
| GSM990582 | 71 |
| GSM990578 | 87 |
| GSM990583 | 80 |
| GSM990584 | 88 |
| GSM990579 | 84 |
| GSM990585 | 72 |
| GSM989986 | 63 |
| GSM989981 | 65 |
| GSM989987 | 28 |
| GSM989982 | 52 |
| GSM989988 | 54 |
| GSM989983 | 32 |
| GSM989989 | 59 |
| GSM989984 | 47 |
| GSM989985 | 54 |
| GSM989990 | 56 |
| GSM990081 | 48 |
| GSM990087 | 68 |
| GSM990082 | 71 |
| GSM990088 | 46 |
| GSM990083 | 52 |
| GSM990089 | 64 |
| GSM990084 | 64 |
| GSM990090 | 57 |
| GSM990085 | 48 |
| GSM990091 | 45 |
| GSM990086 | 55 |
| GSM990092 | 51 |
| GSM989885 | 47 |
| GSM989891 | 68 |
| GSM989886 | 54 |
| GSM989892 | 62 |
| GSM989887 | 73 |
| GSM989893 | 79 |
| GSM989888 | 84 |
| GSM989894 | 72 |
| GSM989889 | 62 |
| GSM989895 | 69 |
| GSM989890 | 89 |
| GSM989896 | 55 |
| GSM990002 | 71 |
| GSM990003 | 77 |
| GSM990004 | 67 |
| GSM990007 | 70 |
| GSM990005 | 84 |
| GSM990008 | 67 |
| GSM990006 | 80 |
| GSM990009 | 63 |
| GSM990010 | 70 |

|           |    |
|-----------|----|
| GSM990478 | 65 |
| GSM990484 | 71 |
| GSM990479 | 45 |
| GSM990480 | 66 |
| GSM990485 | 52 |
| GSM990481 | 76 |
| GSM990482 | 76 |
| GSM990486 | 84 |
| GSM990483 | 45 |
| GSM990487 | 57 |
| GSM989917 | 49 |
| GSM989922 | 76 |
| GSM989918 | 69 |
| GSM989923 | 84 |
| GSM989919 | 63 |
| GSM989924 | 59 |
| GSM989925 | 70 |
| GSM989920 | 66 |
| GSM989926 | 65 |
| GSM989921 | 85 |
| GSM989927 | 68 |
| GSM990618 | 64 |
| GSM990619 | 79 |
| GSM990623 | 78 |
| GSM990620 | 92 |
| GSM990624 | 71 |
| GSM990625 | 68 |
| GSM990621 | 70 |
| GSM990626 | 61 |
| GSM990622 | 77 |
| GSM990627 | 73 |
| GSM989873 | 88 |
| GSM989879 | 73 |
| GSM989874 | 66 |
| GSM989880 | 54 |
| GSM989875 | 78 |
| GSM989881 | 73 |
| GSM989876 | 53 |
| GSM989882 | 96 |
| GSM989877 | 76 |
| GSM989883 | 57 |
| GSM989878 | 67 |
| GSM989884 | 76 |
| GSM990418 | 69 |
| GSM990423 | 81 |
| GSM990419 | 60 |
| GSM990424 | 68 |
| GSM990420 | 65 |
| GSM990425 | 68 |
| GSM990421 | 89 |
| GSM990426 | 65 |
| GSM990422 | 74 |
| GSM990427 | 90 |
| GSM990428 | 66 |
| GSM990305 | 51 |
| GSM990310 | 65 |



|           |    |
|-----------|----|
| GSM990311 | 66 |
| GSM990306 | 63 |
| GSM990312 | 51 |
| GSM990307 | 64 |
| GSM990308 | 64 |
| GSM990313 | 61 |
| GSM990309 | 44 |
| GSM990314 | 52 |
| GSM990319 | 55 |
| GSM990315 | 61 |
| GSM990320 | 59 |
| GSM990316 | 59 |
| GSM990321 | 59 |
| GSM990317 | 57 |
| GSM990322 | 61 |
| GSM990323 | 46 |
| GSM990318 | 52 |
| GSM990324 | 31 |
| GSM990361 | 55 |
| GSM990367 | 40 |
| GSM990362 | 60 |
| GSM990368 | 57 |
| GSM990363 | 65 |
| GSM990369 | 38 |
| GSM990364 | 64 |
| GSM990370 | 64 |
| GSM990365 | 57 |
| GSM990371 | 59 |
| GSM990366 | 63 |
| GSM990372 | 58 |
| GSM989827 | 67 |
| GSM989833 | 73 |
| GSM989828 | 89 |
| GSM989834 | 75 |
| GSM989829 | 66 |
| GSM989835 | 73 |
| GSM989830 | 64 |
| GSM989836 | 83 |
| GSM989831 | 62 |
| GSM989837 | 82 |
| GSM989832 | 87 |
| GSM989838 | 48 |
| GSM990531 | 34 |
| GSM990532 | 44 |
| GSM990533 | 62 |
| GSM990530 | 49 |
| GSM990469 | 79 |
| GSM990470 | 80 |
| GSM990475 | 69 |
| GSM990471 | 76 |
| GSM990476 | 41 |
| GSM990472 | 48 |
| GSM990477 | 69 |
| GSM990473 | 61 |
| GSM990474 | 52 |
| GSM990121 | 64 |

|           |    |
|-----------|----|
| GSM990116 | 59 |
| GSM990122 | 66 |
| GSM990117 | 64 |
| GSM990268 | 52 |
| GSM990118 | 57 |
| GSM990269 | 43 |
| GSM990119 | 57 |
| GSM990270 | 49 |
| GSM990120 | 49 |
| GSM990271 | 51 |
| GSM990385 | 63 |
| GSM990391 | 43 |
| GSM990386 | 59 |
| GSM990392 | 55 |
| GSM990387 | 61 |
| GSM990393 | 47 |
| GSM990388 | 66 |
| GSM990394 | 50 |
| GSM990389 | 65 |
| GSM990395 | 46 |
| GSM990390 | 58 |
| GSM990396 | 54 |
| GSM990546 | 89 |
| GSM990543 | 58 |
| GSM990547 | 89 |
| GSM990548 | 66 |
| GSM990549 | 55 |
| GSM990544 | 83 |
| GSM990550 | 82 |
| GSM990545 | 69 |
| GSM990551 | 73 |
| GSM989907 | 78 |
| GSM989912 | 66 |
| GSM989908 | 65 |
| GSM989913 | 76 |
| GSM989909 | 65 |
| GSM989914 | 74 |
| GSM989910 | 89 |
| GSM989915 | 84 |
| GSM989911 | 85 |
| GSM989916 | 71 |
| GSM990552 | 77 |
| GSM990558 | 91 |
| GSM990553 | 80 |
| GSM990559 | 85 |
| GSM990554 | 79 |
| GSM990560 | 86 |
| GSM990555 | 73 |
| GSM990561 | 74 |
| GSM990556 | 82 |
| GSM990557 | 85 |
| GSM990562 | 90 |
| GSM989902 | 85 |
| GSM989897 | 73 |
| GSM989903 | 68 |
| GSM989898 | 79 |

|           |    |
|-----------|----|
| GSM989904 | 89 |
| GSM989899 | 72 |
| GSM989905 | 73 |
| GSM989900 | 89 |
| GSM989906 | 63 |
| GSM989901 | 79 |
| GSM990526 | 51 |
| GSM990528 | 19 |
| GSM990527 | 57 |
| GSM990529 | 44 |
| GSM990563 | 87 |
| GSM990569 | 85 |
| GSM990564 | 76 |
| GSM990570 | 69 |
| GSM990565 | 81 |
| GSM990571 | 85 |
| GSM990566 | 59 |
| GSM990572 | 85 |
| GSM990567 | 73 |
| GSM990573 | 84 |
| GSM990568 | 76 |
| GSM990574 | 83 |
| GSM990272 | 58 |
| GSM990278 | 46 |
| GSM990273 | 63 |
| GSM990279 | 46 |
| GSM990274 | 55 |
| GSM990280 | 66 |
| GSM990275 | 50 |
| GSM990276 | 57 |
| GSM990281 | 55 |
| GSM990277 | 33 |
| GSM990282 | 64 |
| GSM990449 | 72 |
| GSM990455 | 56 |
| GSM990450 | 48 |
| GSM990456 | 79 |
| GSM990451 | 60 |
| GSM990457 | 82 |
| GSM990452 | 61 |
| GSM990458 | 58 |
| GSM990453 | 69 |
| GSM990459 | 75 |
| GSM990454 | 81 |
| GSM990460 | 78 |
| GSM990439 | 52 |
| GSM990444 | 51 |
| GSM990440 | 65 |
| GSM990445 | 78 |
| GSM990441 | 73 |
| GSM990446 | 53 |
| GSM990442 | 65 |
| GSM990447 | 68 |
| GSM990443 | 84 |
| GSM990448 | 52 |
| GSM990011 | 56 |

|           |     |
|-----------|-----|
| GSM990015 | 74  |
| GSM990012 | 67  |
| GSM990016 | 73  |
| GSM990013 | 70  |
| GSM990017 | 77  |
| GSM990014 | 70  |
| GSM990018 | 80  |
| GSM990019 | 66  |
| GSM990020 | 85  |
| GSM990283 | 46  |
| GSM990288 | 48  |
| GSM990284 | 66  |
| GSM990289 | 45  |
| GSM990285 | 47  |
| GSM990290 | 62  |
| GSM990286 | 58  |
| GSM990291 | 50  |
| GSM990287 | 61  |
| GSM990292 | 34  |
| GSM989862 | 54  |
| GSM989867 | 87  |
| GSM989868 | 74  |
| GSM989863 | 101 |
| GSM989869 | 77  |
| GSM989864 | 79  |
| GSM989870 | 73  |
| GSM989865 | 84  |
| GSM989871 | 87  |
| GSM989866 | 85  |
| GSM989872 | 85  |
| GSM989839 | 77  |
| GSM989845 | 92  |
| GSM989840 | 54  |
| GSM989846 | 60  |
| GSM989841 | 63  |
| GSM989847 | 79  |
| GSM989842 | 71  |
| GSM989848 | 68  |
| GSM989843 | 68  |
| GSM989849 | 93  |
| GSM989844 | 80  |
| GSM990537 | 25  |
| GSM990540 | 40  |
| GSM990538 | 36  |
| GSM990541 | 22  |
| GSM990539 | 21  |
| GSM990542 | 36  |
| GSM990337 | 67  |
| GSM990343 | 50  |
| GSM990338 | 59  |
| GSM990344 | 57  |
| GSM990339 | 58  |
| GSM990345 | 66  |
| GSM990340 | 54  |
| GSM990346 | 44  |
| GSM990341 | 57  |

|           |    |
|-----------|----|
| GSM990347 | 62 |
| GSM990342 | 60 |
| GSM990348 | 76 |
| GSM990488 | 68 |
| GSM990492 | 73 |
| GSM990489 | 74 |
| GSM990493 | 79 |
| GSM990490 | 33 |
| GSM990494 | 72 |
| GSM990495 | 78 |
| GSM990496 | 68 |
| GSM990491 | 68 |
| GSM990497 | 52 |
| GSM989991 | 50 |
| GSM989995 | 47 |
| GSM989992 | 30 |
| GSM989996 | 33 |
| GSM989997 | 38 |
| GSM989998 | 35 |
| GSM989993 | 50 |
| GSM989999 | 47 |
| GSM989994 | 47 |
| GSM990000 | 80 |
| GSM990028 | 79 |
| GSM990029 | 75 |
| GSM990033 | 92 |
| GSM990030 | 68 |
| GSM990031 | 64 |
| GSM990034 | 74 |
| GSM990032 | 70 |
| GSM990035 | 69 |
| GSM990036 | 80 |
| GSM990397 | 80 |
| GSM990401 | 64 |
| GSM990398 | 83 |
| GSM990402 | 70 |
| GSM990399 | 77 |
| GSM990403 | 82 |
| GSM990400 | 76 |
| GSM990404 | 58 |
| GSM990405 | 66 |
| GSM990070 | 48 |
| GSM990075 | 46 |
| GSM990071 | 44 |
| GSM990076 | 60 |
| GSM990077 | 40 |
| GSM990072 | 48 |
| GSM990078 | 43 |
| GSM990073 | 62 |
| GSM990079 | 41 |
| GSM990074 | 54 |
| GSM990080 | 53 |
| GSM990104 | 70 |
| GSM990110 | 65 |
| GSM990105 | 44 |
| GSM990111 | 50 |

|           |    |
|-----------|----|
| GSM990106 | 62 |
| GSM990112 | 55 |
| GSM990107 | 51 |
| GSM990113 | 62 |
| GSM990108 | 41 |
| GSM990114 | 61 |
| GSM990109 | 53 |
| GSM990115 | 38 |
| GSM989928 | 84 |
| GSM989932 | 69 |
| GSM989929 | 75 |
| GSM989933 | 78 |
| GSM989934 | 78 |
| GSM989935 | 52 |
| GSM989930 | 51 |
| GSM989936 | 49 |
| GSM989931 | 63 |
| GSM989937 | 53 |
| GSM989955 | 50 |
| GSM989950 | 63 |
| GSM989956 | 86 |
| GSM989951 | 80 |
| GSM989957 | 70 |
| GSM989952 | 60 |
| GSM989958 | 54 |
| GSM989953 | 71 |
| GSM989959 | 69 |
| GSM989954 | 67 |
| GSM989960 | 76 |
| GSM990093 | 53 |
| GSM990094 | 60 |
| GSM990099 | 64 |
| GSM990095 | 51 |
| GSM990100 | 58 |
| GSM990096 | 73 |
| GSM990101 | 43 |
| GSM990097 | 38 |
| GSM990102 | 38 |
| GSM990098 | 42 |
| GSM990103 | 54 |
| GSM990509 | 56 |
| GSM990514 | 60 |
| GSM990515 | 47 |
| GSM990510 | 47 |
| GSM990516 | 55 |
| GSM990511 | 56 |
| GSM990512 | 60 |
| GSM990513 | 75 |
| GSM990517 | 32 |
| GSM990293 | 64 |
| GSM990299 | 37 |
| GSM990294 | 55 |
| GSM990300 | 60 |
| GSM990295 | 48 |
| GSM990301 | 63 |
| GSM990296 | 60 |

|            |    |
|------------|----|
| GSM990302  | 59 |
| GSM990297  | 64 |
| GSM990303  | 54 |
| GSM990298  | 58 |
| GSM990304  | 60 |
| GSM1225377 | 50 |
| GSM1225378 | 56 |
| GSM1225379 | 49 |
| GSM1225380 | 64 |
| GSM1225381 | 51 |
| GSM1225382 | 50 |
| GSM1225383 | 47 |
| GSM1225384 | 46 |
| GSM1225385 | 50 |
| GSM1225386 | 56 |
| GSM1225387 | 63 |
| GSM1225388 | 48 |
| GSM1225389 | 53 |
| GSM1225390 | 65 |
| GSM1225391 | 58 |
| GSM1225392 | 60 |
| GSM1225393 | 61 |
| GSM1225394 | 48 |
| GSM1225395 | 54 |
| GSM1225396 | 59 |
| GSM1225397 | 47 |
| GSM1225398 | 63 |
| GSM1225399 | 63 |
| GSM1225400 | 46 |
| GSM1225401 | 55 |
| GSM1225402 | 60 |
| GSM1225403 | 61 |
| GSM1225404 | 64 |
| GSM1225405 | 65 |
| GSM1225406 | 52 |
| GSM1225407 | 43 |
| GSM1225408 | 62 |
| GSM1225409 | 50 |
| GSM1225410 | 43 |
| GSM1225411 | 49 |
| GSM1225412 | 59 |
| GSM1225413 | 49 |
| GSM1225414 | 45 |
| GSM1225415 | 43 |
| GSM1225416 | 50 |
| GSM1225417 | 52 |
| GSM1225418 | 50 |
| GSM1225419 | 61 |
| GSM1225420 | 60 |
| GSM1225421 | 63 |
| GSM1225422 | 55 |
| GSM1225423 | 57 |
| GSM1225424 | 56 |
| GSM1225425 | 59 |
| GSM1225426 | 45 |
| GSM1225427 | 63 |

|            |    |
|------------|----|
| GSM1225428 | 64 |
| GSM1225429 | 53 |
| GSM1225430 | 51 |
| GSM1225431 | 51 |
| GSM1225432 | 60 |
| GSM1225433 | 52 |
| GSM1225434 | 61 |
| GSM1225435 | 60 |
| GSM1225436 | 60 |
| GSM1225437 | 58 |
| GSM1225438 | 56 |
| GSM1225439 | 51 |
| GSM1225440 | 56 |
| GSM1225441 | 61 |
| GSM1225442 | 59 |
| GSM1225443 | 55 |
| GSM1225444 | 65 |
| GSM1225445 | 40 |
| GSM1225446 | 64 |
| GSM1225447 | 61 |
| GSM1225448 | 56 |
| GSM1225449 | 47 |
| GSM1225450 | 55 |
| GSM1225451 | 57 |
| GSM1225452 | 45 |
| GSM1225453 | 61 |
| GSM1225454 | 57 |
| GSM1225455 | 54 |
| GSM1225456 | 60 |
| GSM1225457 | 58 |
| GSM1225458 | 63 |
| GSM1225459 | 50 |
| GSM1225460 | 47 |
| GSM1225461 | 61 |
| GSM1225462 | 60 |
| GSM1225463 | 54 |
| GSM1225464 | 58 |
| GSM1225465 | 59 |
| GSM1225466 | 63 |
| GSM1225467 | 62 |
| GSM1225468 | 62 |
| GSM1225469 | 60 |
| GSM1225470 | 54 |
| GSM1225471 | 64 |
| GSM1225472 | 38 |
| GSM1225473 | 57 |
| GSM1225474 | 64 |
| GSM1225475 | 59 |
| GSM1225476 | 47 |
| GSM1225477 | 62 |
| GSM1225478 | 61 |
| GSM1225479 | 47 |
| GSM1225480 | 56 |
| GSM1225481 | 61 |
| GSM1225482 | 54 |
| GSM1225483 | 53 |



|            |    |
|------------|----|
| GSM1225484 | 47 |
| GSM1225485 | 67 |
| GSM1225486 | 51 |
| GSM1225487 | 60 |
| GSM1225488 | 45 |
| GSM1225489 | 44 |
| GSM1225490 | 42 |
| GSM1225491 | 45 |
| GSM1225492 | 61 |
| GSM1225493 | 50 |
| GSM1225494 | 57 |
| GSM1225495 | 44 |
| GSM1225496 | 64 |
| GSM1225497 | 42 |
| GSM1225498 | 60 |
| GSM1225499 | 56 |
| GSM1225500 | 64 |
| GSM1225501 | 49 |
| GSM1225502 | 52 |
| GSM1225503 | 51 |
| GSM1225504 | 54 |
| GSM1225505 | 42 |
| GSM1225506 | 48 |
| GSM1225507 | 65 |
| GSM1225508 | 48 |
| GSM1225509 | 62 |
| GSM1225510 | 54 |
| GSM1225511 | 58 |
| GSM1225512 | 56 |
| GSM1225513 | 61 |
| GSM1225514 | 58 |
| GSM1225515 | 55 |
| GSM1225516 | 65 |
| GSM1225517 | 58 |
| GSM1225518 | 53 |
| GSM1225519 | 55 |
| GSM1225520 | 48 |
| GSM1225521 | 59 |
| GSM1225522 | 44 |
| GSM1225523 | 62 |
| GSM1225524 | 56 |
| GSM1225525 | 60 |
| GSM1225526 | 50 |
| GSM1225527 | 46 |
| GSM1225528 | 62 |
| GSM1225529 | 56 |
| GSM1225530 | 61 |
| GSM1225531 | 49 |
| GSM1225532 | 46 |
| GSM1225533 | 45 |
| GSM1225534 | 65 |
| GSM1225535 | 63 |
| GSM1225536 | 57 |
| GSM1225537 | 56 |
| GSM1225538 | 49 |
| GSM1225539 | 60 |

|            |    |
|------------|----|
| GSM1225540 | 65 |
| GSM1225541 | 61 |
| GSM1225542 | 52 |
| GSM1225543 | 58 |
| GSM1225544 | 49 |
| GSM1225545 | 63 |
| GSM1225546 | 54 |
| GSM1225547 | 63 |
| GSM1225548 | 54 |
| GSM1225549 | 53 |
| GSM1225550 | 64 |
| GSM1225551 | 60 |
| GSM1225552 | 60 |
| GSM1225553 | 43 |
| GSM1225554 | 53 |
| GSM1225555 | 62 |
| GSM1225556 | 54 |
| GSM1225557 | 60 |
| GSM1225558 | 58 |
| GSM1225559 | 61 |
| GSM1225560 | 63 |
| GSM1225561 | 63 |
| GSM1225562 | 51 |
| GSM1225563 | 53 |
| GSM1225564 | 47 |
| GSM1225565 | 52 |
| GSM1225566 | 51 |
| GSM1225567 | 65 |
| GSM1225568 | 52 |
| GSM1225569 | 46 |
| GSM1225570 | 44 |
| GSM1225571 | 61 |
| GSM1225572 | 56 |
| GSM1225573 | 42 |
| GSM1225574 | 59 |
| GSM1225575 | 47 |
| GSM1225576 | 59 |
| GSM1225577 | 60 |
| GSM1225578 | 55 |
| GSM1225579 | 51 |
| GSM1225580 | 61 |
| GSM1225581 | 62 |
| GSM1225582 | 59 |
| GSM1225583 | 53 |
| GSM1225584 | 45 |
| GSM1225585 | 61 |
| GSM1225586 | 42 |
| GSM1225587 | 61 |
| GSM1225588 | 42 |
| GSM1225589 | 63 |
| GSM1225590 | 57 |
| GSM1225591 | 60 |
| GSM1225592 | 44 |
| GSM1225593 | 50 |
| GSM1225594 | 64 |
| GSM1225595 | 49 |

|            |    |
|------------|----|
| GSM1225596 | 63 |
| GSM1225597 | 58 |
| GSM1225598 | 61 |
| GSM1225599 | 58 |
| GSM1225600 | 48 |
| GSM1225601 | 51 |
| GSM1225602 | 51 |
| GSM1225603 | 63 |
| GSM1225604 | 55 |
| GSM1225605 | 48 |
| GSM1225606 | 56 |
| GSM1225607 | 62 |
| GSM1225608 | 64 |
| GSM1225609 | 63 |
| GSM1225610 | 64 |
| GSM1225611 | 49 |
| GSM1225612 | 49 |
| GSM1225613 | 58 |
| GSM1225614 | 60 |
| GSM1225615 | 61 |
| GSM1225616 | 59 |
| GSM1225617 | 61 |
| GSM1225618 | 50 |
| GSM1225619 | 64 |
| GSM1225620 | 64 |
| GSM1225621 | 63 |
| GSM1225622 | 61 |
| GSM1225623 | 50 |
| GSM1225624 | 55 |
| GSM1225625 | 42 |
| GSM1225626 | 61 |
| GSM1225627 | 55 |
| GSM1225628 | 61 |
| GSM1225629 | 57 |
| GSM1225630 | 63 |
| GSM1225631 | 54 |
| GSM1225632 | 60 |
| GSM1225633 | 62 |
| GSM1225634 | 53 |
| GSM1225635 | 52 |
| GSM1225636 | 46 |
| GSM1225637 | 49 |
| GSM1225638 | 59 |
| GSM1225639 | 51 |
| GSM1225640 | 58 |
| GSM1225641 | 64 |
| GSM1225642 | 63 |
| GSM1225643 | 58 |
| GSM1225644 | 52 |
| GSM1225645 | 42 |
| GSM1225646 | 65 |
| GSM1225647 | 42 |
| GSM1225648 | 64 |
| GSM1225649 | 60 |
| GSM1225650 | 53 |
| GSM1225651 | 54 |

|            |    |
|------------|----|
| GSM1225652 | 64 |
| GSM1225653 | 41 |
| GSM1225654 | 51 |
| GSM1225655 | 54 |
| GSM1225656 | 42 |
| GSM1225657 | 45 |
| GSM1225658 | 42 |
| GSM1225659 | 48 |
| GSM1225660 | 56 |
| GSM1225661 | 56 |
| GSM1225662 | 62 |
| GSM1225663 | 51 |
| GSM1225664 | 51 |
| GSM1225665 | 61 |
| GSM1225666 | 54 |
| GSM1225667 | 60 |
| GSM1225668 | 54 |
| GSM1225669 | 43 |
| GSM1225670 | 56 |
| GSM1225671 | 63 |
| GSM1225672 | 63 |
| GSM1225673 | 58 |
| GSM1225674 | 57 |
| GSM1225675 | 64 |
| GSM1225676 | 65 |
| GSM1225677 | 52 |
| GSM1225678 | 50 |
| GSM1225679 | 58 |
| GSM1225680 | 51 |
| GSM1225681 | 56 |
| GSM1225682 | 51 |
| GSM1225683 | 54 |
| GSM1225684 | 50 |
| GSM1225685 | 60 |
| GSM1225686 | 54 |
| GSM1225687 | 60 |
| GSM1225688 | 50 |
| GSM1225689 | 58 |
| GSM1225690 | 62 |
| GSM1225691 | 63 |
| GSM1225692 | 60 |
| GSM1225693 | 63 |
| GSM1225694 | 48 |
| GSM1225695 | 45 |
| GSM1225696 | 56 |
| GSM1225697 | 62 |
| GSM1225698 | 60 |
| GSM1225699 | 56 |
| GSM1225700 | 53 |
| GSM1225701 | 63 |
| GSM1225702 | 56 |
| GSM1225703 | 59 |
| GSM1225704 | 44 |
| GSM1225705 | 60 |
| GSM1225706 | 51 |
| GSM1225707 | 62 |

|            |    |
|------------|----|
| GSM1225708 | 64 |
| GSM1225709 | 44 |
| GSM1225710 | 49 |
| GSM1225711 | 57 |
| GSM1225712 | 44 |
| GSM1225713 | 63 |
| GSM1225714 | 59 |
| GSM1225715 | 64 |
| GSM1225716 | 65 |
| GSM1225725 | 51 |
| GSM1225726 | 56 |
| GSM1225727 | 57 |
| GSM1225728 | 45 |
| GSM1225729 | 62 |
| GSM1225730 | 55 |
| GSM1225731 | 47 |
| GSM1225732 | 61 |
| GSM1225733 | 53 |
| GSM1225734 | 59 |
| GSM1225735 | 46 |
| GSM1225736 | 56 |
| GSM1225737 | 57 |
| GSM1225738 | 50 |
| GSM1225739 | 59 |
| GSM1225740 | 59 |
| GSM1225741 | 54 |
| GSM1225742 | 57 |
| GSM1225743 | 57 |
| GSM1225744 | 44 |
| GSM1225745 | 55 |
| GSM1225746 | 52 |
| GSM1225747 | 48 |
| GSM1225748 | 61 |
| GSM1225749 | 51 |
| GSM1225750 | 56 |
| GSM1225751 | 63 |
| GSM1225752 | 47 |
| GSM1225753 | 61 |
| GSM1225754 | 51 |
| GSM1225755 | 57 |
| GSM1225756 | 65 |
| GSM1225757 | 44 |
| GSM1225758 | 52 |
| GSM1225759 | 45 |
| GSM1225760 | 41 |
| GSM1225761 | 63 |
| GSM1225762 | 56 |
| GSM1225763 | 52 |
| GSM1225764 | 55 |
| GSM1225792 | 64 |
| GSM1225793 | 54 |
| GSM1225794 | 62 |
| GSM1225795 | 46 |
| GSM1225796 | 45 |
| GSM1225797 | 58 |
| GSM1225798 | 59 |

|            |    |
|------------|----|
| GSM1225799 | 62 |
| GSM1225801 | 60 |
| GSM1225802 | 58 |
| GSM1225803 | 65 |
| GSM1225805 | 55 |
| GSM1225807 | 49 |
| GSM1225809 | 43 |
| GSM1225810 | 52 |
| GSM1225811 | 62 |
| GSM1225812 | 57 |
| GSM1225813 | 65 |
| GSM1225814 | 53 |
| GSM1225815 | 51 |
| GSM1225828 | 46 |
| GSM1225829 | 46 |
| GSM1225830 | 61 |
| GSM1225831 | 59 |
| GSM1225832 | 53 |
| GSM1225833 | 63 |
| GSM1225834 | 56 |
| GSM1225835 | 63 |
| GSM1225836 | 54 |
| GSM1225837 | 46 |
| GSM1225838 | 62 |
| GSM1225839 | 64 |
| GSM1225840 | 55 |
| GSM1225841 | 49 |
| GSM1225842 | 57 |
| GSM1225843 | 47 |
| GSM1225844 | 60 |
| GSM1225845 | 58 |
| GSM1225846 | 55 |
| GSM1225847 | 42 |
| GSM1225848 | 62 |
| GSM1225849 | 54 |
| GSM1225850 | 49 |
| GSM1225851 | 46 |
| GSM1225852 | 65 |
| GSM1225853 | 59 |
| GSM1225854 | 44 |
| GSM1225855 | 62 |
| GSM1225856 | 62 |
| GSM1225857 | 64 |
| GSM1225858 | 65 |
| GSM1225859 | 46 |
| GSM1225860 | 56 |
| GSM1225861 | 59 |
| GSM1225862 | 58 |
| GSM1225863 | 55 |
| GSM1225864 | 58 |
| GSM1225865 | 63 |
| GSM1225866 | 63 |
| GSM1225867 | 50 |
| GSM1225868 | 51 |
| GSM1225869 | 65 |
| GSM1225870 | 58 |

|            |    |
|------------|----|
| GSM1225871 | 42 |
| GSM1225872 | 46 |
| GSM1225873 | 42 |
| GSM1225874 | 62 |
| GSM1225875 | 59 |
| GSM1225876 | 60 |
| GSM1225877 | 57 |
| GSM1225878 | 44 |
| GSM1225879 | 65 |
| GSM1225880 | 64 |
| GSM1225881 | 57 |
| GSM1225882 | 52 |
| GSM1225883 | 52 |
| GSM1225884 | 58 |
| GSM1225885 | 63 |
| GSM1225886 | 63 |
| GSM1225887 | 64 |
| GSM1225888 | 49 |
| GSM1225889 | 53 |
| GSM1225890 | 51 |
| GSM1225891 | 64 |
| GSM1236016 | 53 |
| GSM1236123 | 57 |
| GSM1236265 | 63 |
| GSM1235917 | 60 |
| GSM1235686 | 41 |
| GSM1236227 | 55 |
| GSM1236108 | 60 |
| GSM1235621 | 59 |
| GSM1236234 | 54 |
| GSM1235745 | 65 |
| GSM1236327 | 54 |
| GSM1235685 | 55 |
| GSM1236358 | 49 |
| GSM1235881 | 62 |
| GSM1235906 | 60 |
| GSM1235811 | 57 |
| GSM1235955 | 45 |
| GSM1235748 | 64 |
| GSM1235807 | 62 |
| GSM1235830 | 58 |
| GSM1235942 | 58 |
| GSM1235599 | 44 |
| GSM1235691 | 57 |
| GSM1235677 | 48 |
| GSM1236230 | 55 |
| GSM1235759 | 62 |
| GSM1235730 | 59 |
| GSM1235947 | 58 |
| GSM1235949 | 55 |
| GSM1236173 | 50 |
| GSM1236038 | 45 |
| GSM1235654 | 54 |
| GSM1236342 | 52 |
| GSM1235703 | 47 |
| GSM1235743 | 45 |

|            |    |
|------------|----|
| GSM1236309 | 45 |
| GSM1235556 | 61 |
| GSM1236367 | 54 |
| GSM1235535 | 45 |
| GSM1236074 | 57 |
| GSM1235791 | 62 |
| GSM1235990 | 60 |
| GSM1236053 | 60 |
| GSM1236087 | 49 |
| GSM1235545 | 39 |
| GSM1235775 | 56 |
| GSM1235648 | 57 |
| GSM1236305 | 50 |
| GSM1236360 | 58 |
| GSM1235782 | 58 |
| GSM1235699 | 43 |
| GSM1236293 | 53 |
| GSM1235632 | 65 |
| GSM1235613 | 56 |
| GSM1236329 | 54 |
| GSM1235642 | 52 |
| GSM1236214 | 44 |
| GSM1235903 | 63 |
| GSM1236326 | 44 |
| GSM1236121 | 56 |
| GSM1235560 | 57 |
| GSM1236203 | 54 |
| GSM1235754 | 60 |
| GSM1236032 | 51 |
| GSM1235580 | 54 |
| GSM1235604 | 64 |
| GSM1235894 | 55 |
| GSM1235907 | 60 |
| GSM1236278 | 49 |
| GSM1235694 | 56 |
| GSM1236275 | 47 |
| GSM1236269 | 60 |
| GSM1235670 | 49 |
| GSM1236336 | 60 |
| GSM1235609 | 45 |
| GSM1235558 | 54 |
| GSM1236063 | 59 |
| GSM1236307 | 59 |
| GSM1235999 | 53 |
| GSM1236112 | 48 |
| GSM1235876 | 37 |
| GSM1235817 | 41 |
| GSM1236292 | 40 |
| GSM1235738 | 71 |
| GSM1236343 | 51 |
| GSM1236311 | 56 |
| GSM1236155 | 52 |
| GSM1235644 | 43 |
| GSM1235643 | 49 |
| GSM1235612 | 59 |
| GSM1236288 | 63 |



|            |    |
|------------|----|
| GSM1235541 | 44 |
| GSM1236221 | 47 |
| GSM1236052 | 41 |
| GSM1235810 | 58 |
| GSM1235784 | 53 |
| GSM1236007 | 38 |
| GSM1236322 | 63 |
| GSM1235803 | 61 |
| GSM1235690 | 62 |
| GSM1235689 | 50 |
| GSM1236239 | 57 |
| GSM1235769 | 50 |
| GSM1235846 | 60 |
| GSM1236044 | 48 |
| GSM1235874 | 53 |
| GSM1235696 | 49 |
| GSM1236002 | 44 |
| GSM1236196 | 44 |
| GSM1235765 | 46 |
| GSM1235709 | 65 |
| GSM1235944 | 65 |
| GSM1235615 | 49 |
| GSM1236370 | 53 |
| GSM1235570 | 59 |
| GSM1236009 | 51 |
| GSM1236162 | 60 |
| GSM1235851 | 59 |
| GSM1235581 | 50 |
| GSM1236113 | 49 |
| GSM1236180 | 48 |
| GSM1236160 | 49 |
| GSM1236224 | 57 |
| GSM1236054 | 44 |
| GSM1235687 | 56 |
| GSM1235984 | 58 |
| GSM1236271 | 39 |
| GSM1236092 | 57 |
| GSM1236046 | 52 |
| GSM1236328 | 45 |
| GSM1235816 | 53 |
| GSM1236334 | 65 |
| GSM1236195 | 58 |
| GSM1235850 | 59 |
| GSM1236138 | 60 |
| GSM1235977 | 57 |
| GSM1235653 | 50 |
| GSM1235614 | 60 |
| GSM1235650 | 58 |
| GSM1236237 | 46 |
| GSM1235587 | 51 |
| GSM1236167 | 52 |
| GSM1235794 | 45 |
| GSM1235819 | 45 |
| GSM1235887 | 53 |
| GSM1236029 | 48 |
| GSM1236372 | 35 |

|            |    |
|------------|----|
| GSM1236280 | 58 |
| GSM1236025 | 55 |
| GSM1236282 | 59 |
| GSM1236018 | 62 |
| GSM1235924 | 62 |
| GSM1235651 | 46 |
| GSM1236324 | 55 |
| GSM1235866 | 57 |
| GSM1235795 | 59 |
| GSM1236267 | 56 |
| GSM1236031 | 58 |
| GSM1236283 | 52 |
| GSM1235854 | 35 |
| GSM1236181 | 46 |
| GSM1235812 | 44 |
| GSM1235698 | 48 |
| GSM1235635 | 52 |
| GSM1236323 | 62 |
| GSM1236186 | 57 |
| GSM1235950 | 51 |
| GSM1235571 | 43 |
| GSM1235798 | 59 |
| GSM1235981 | 37 |
| GSM1235891 | 36 |
| GSM1236026 | 58 |
| GSM1235869 | 52 |
| GSM1235818 | 42 |
| GSM1235710 | 55 |
| GSM1235852 | 62 |
| GSM1235752 | 65 |
| GSM1236060 | 64 |
| GSM1235736 | 72 |
| GSM1235740 | 45 |
| GSM1236216 | 56 |
| GSM1236115 | 61 |
| GSM1235963 | 58 |
| GSM1235713 | 59 |
| GSM1235758 | 53 |
| GSM1235877 | 53 |
| GSM1235883 | 63 |
| GSM1235753 | 46 |
| GSM1236348 | 45 |
| GSM1236368 | 66 |
| GSM1235647 | 59 |
| GSM1235956 | 56 |
| GSM1236209 | 40 |
| GSM1236086 | 45 |
| GSM1235720 | 47 |
| GSM1235962 | 53 |
| GSM1235905 | 56 |
| GSM1235547 | 50 |
| GSM1235831 | 43 |
| GSM1235997 | 46 |
| GSM1235712 | 57 |
| GSM1236366 | 47 |
| GSM1235537 | 47 |

|            |    |
|------------|----|
| GSM1236050 | 55 |
| GSM1235626 | 47 |
| GSM1235593 | 63 |
| GSM1235964 | 54 |
| GSM1235946 | 54 |
| GSM1235911 | 59 |
| GSM1235957 | 58 |
| GSM1236040 | 53 |
| GSM1236013 | 53 |
| GSM1236154 | 52 |
| GSM1235721 | 53 |
| GSM1235540 | 56 |
| GSM1235929 | 55 |
| GSM1235596 | 61 |
| GSM1235871 | 49 |
| GSM1236190 | 50 |
| GSM1235674 | 50 |
| GSM1235534 | 54 |
| GSM1236268 | 61 |
| GSM1235815 | 58 |
| GSM1236048 | 45 |
| GSM1236110 | 41 |
| GSM1235770 | 46 |
| GSM1236199 | 56 |
| GSM1235664 | 55 |
| GSM1236084 | 46 |
| GSM1235597 | 64 |
| GSM1235658 | 53 |
| GSM1235875 | 46 |
| GSM1235628 | 56 |
| GSM1235649 | 54 |
| GSM1236330 | 65 |
| GSM1236279 | 40 |
| GSM1235725 | 61 |
| GSM1235559 | 52 |
| GSM1235790 | 63 |
| GSM1235701 | 53 |
| GSM1235901 | 54 |
| GSM1235879 | 56 |
| GSM1236197 | 53 |
| GSM1235978 | 58 |
| GSM1235625 | 52 |
| GSM1236055 | 57 |
| GSM1236262 | 46 |
| GSM1236109 | 57 |
| GSM1236243 | 59 |
| GSM1236205 | 61 |
| GSM1235922 | 63 |
| GSM1235557 | 58 |
| GSM1235741 | 63 |
| GSM1236219 | 65 |
| GSM1235605 | 64 |
| GSM1235897 | 46 |
| GSM1235722 | 49 |
| GSM1236004 | 56 |
| GSM1235893 | 61 |

|            |    |
|------------|----|
| GSM1235802 | 60 |
| GSM1235941 | 58 |
| GSM1236192 | 58 |
| GSM1235724 | 57 |
| GSM1236325 | 57 |
| GSM1235945 | 58 |
| GSM1235746 | 54 |
| GSM1235988 | 63 |
| GSM1235590 | 56 |
| GSM1235979 | 45 |
| GSM1235813 | 48 |
| GSM1236065 | 54 |
| GSM1235965 | 59 |
| GSM1235804 | 43 |
| GSM1235788 | 48 |
| GSM1236375 | 57 |
| GSM1235542 | 56 |
| GSM1235693 | 47 |
| GSM1235751 | 68 |
| GSM1236061 | 63 |
| GSM1235555 | 59 |
| GSM1235633 | 45 |
| GSM1235640 | 49 |
| GSM1235661 | 57 |
| GSM1235552 | 51 |
| GSM1235731 | 43 |
| GSM1236097 | 54 |
| GSM1235554 | 53 |
| GSM1236119 | 55 |
| GSM1236043 | 46 |
| GSM1235639 | 52 |
| GSM1235577 | 39 |
| GSM1235546 | 60 |
| GSM1235940 | 55 |
| GSM1236091 | 50 |
| GSM1236142 | 46 |
| GSM1236232 | 61 |
| GSM1235645 | 53 |
| GSM1236175 | 54 |
| GSM1235774 | 59 |
| GSM1236294 | 47 |
| GSM1235576 | 41 |
| GSM1235672 | 43 |
| GSM1235656 | 46 |
| GSM1236208 | 58 |
| GSM1236147 | 63 |
| GSM1236291 | 64 |
| GSM1236107 | 61 |
| GSM1236131 | 61 |
| GSM1236373 | 54 |
| GSM1235641 | 39 |
| GSM1235595 | 60 |
| GSM1236118 | 60 |
| GSM1236363 | 53 |
| GSM1235786 | 43 |
| GSM1235829 | 57 |

|            |    |
|------------|----|
| GSM1235779 | 54 |
| GSM1236320 | 57 |
| GSM1235980 | 61 |
| GSM1235673 | 59 |
| GSM1236098 | 62 |
| GSM1235773 | 64 |
| GSM1236296 | 52 |
| GSM1235834 | 53 |
| GSM1235953 | 46 |
| GSM1236067 | 55 |
| GSM1235539 | 52 |
| GSM1236135 | 60 |
| GSM1244499 | 25 |
| GSM1244500 | 25 |
| GSM1244501 | 45 |
| GSM1244502 | 45 |
| GSM1244503 | 74 |
| GSM1244504 | 74 |
| GSM1244505 | 54 |
| GSM1244506 | 54 |
| GSM1244507 | 54 |
| GSM1244508 | 54 |
| GSM1244509 | 54 |
| GSM1244510 | 54 |
| GSM1244511 | 31 |
| GSM1244512 | 31 |
| GSM1244513 | 43 |
| GSM1244514 | 43 |
| GSM1244515 | 41 |
| GSM1244516 | 41 |
| GSM1244517 | 45 |
| GSM1244518 | 45 |
| GSM1244519 | 23 |
| GSM1244520 | 23 |
| GSM1244521 | 32 |
| GSM1244522 | 32 |
| GSM1244534 | 26 |
| GSM1244535 | 26 |
| GSM1244536 | 26 |
| GSM1244537 | 26 |
| GSM1244538 | 26 |
| GSM1244539 | 26 |
| GSM1244540 | 26 |
| GSM1244541 | 26 |
| GSM1244542 | 31 |
| GSM1244543 | 31 |
| GSM1244544 | 31 |
| GSM1244545 | 31 |
| GSM1244546 | 24 |
| GSM1244547 | 24 |
| GSM1244548 | 24 |
| GSM1244549 | 24 |
| GSM1244550 | 39 |
| GSM1244551 | 39 |
| GSM1244552 | 39 |
| GSM1244553 | 39 |

|            |    |
|------------|----|
| GSM1244554 | 37 |
| GSM1244555 | 37 |
| GSM1244556 | 37 |
| GSM1244557 | 37 |
| GSM1244558 | 24 |
| GSM1244559 | 24 |
| GSM1244560 | 24 |
| GSM1244561 | 24 |
| GSM1244562 | 24 |
| GSM1244563 | 24 |
| GSM1244564 | 24 |
| GSM1244565 | 24 |
| GSM1244566 | 24 |
| GSM1244567 | 27 |
| GSM1244568 | 27 |
| GSM1244569 | 27 |
| GSM1259870 | 60 |
| GSM1259871 | 60 |
| GSM1259872 | 60 |
| GSM1259873 | 60 |
| GSM1259874 | 21 |
| GSM1259875 | 21 |
| GSM1259876 | 59 |
| GSM1259877 | 59 |
| GSM1259878 | 21 |
| GSM1259879 | 21 |
| GSM1259880 | 22 |
| GSM1259881 | 22 |
| GSM1259882 | 22 |
| GSM1259883 | 22 |
| GSM1259884 | 21 |
| GSM1259885 | 21 |
| GSM1259886 | 66 |
| GSM1259887 | 66 |
| GSM1259888 | 58 |
| GSM1259889 | 58 |
| GSM1259890 | 21 |
| GSM1259891 | 21 |
| GSM1259892 | 60 |
| GSM1259893 | 60 |
| GSM1282779 | 55 |
| GSM1282780 | 55 |
| GSM1282781 | 47 |
| GSM1282782 | 47 |
| GSM1282783 | 65 |
| GSM1282784 | 65 |
| GSM1282785 | 69 |
| GSM1282786 | 69 |
| GSM1282787 | 55 |
| GSM1282788 | 55 |
| GSM1282789 | 63 |
| GSM1282790 | 63 |
| GSM1282791 | 59 |
| GSM1282792 | 64 |
| GSM1282793 | 64 |
| GSM1282794 | 66 |

|            |    |
|------------|----|
| GSM1282795 | 66 |
| GSM1282796 | 67 |
| GSM1282797 | 67 |
| GSM1282798 | 57 |
| GSM1282799 | 57 |
| GSM1282800 | 67 |
| GSM1282801 | 67 |
| GSM1282802 | 75 |
| GSM1282803 | 75 |
| GSM1282804 | 70 |
| GSM1282805 | 59 |
| GSM1282806 | 59 |
| GSM1282807 | 59 |
| GSM1282808 | 59 |
| GSM1282809 | 59 |
| GSM1282810 | 59 |
| GSM1282811 | 62 |
| GSM1282812 | 62 |
| GSM1282813 | 55 |
| GSM1282814 | 55 |
| GSM1282815 | 60 |
| GSM1282816 | 60 |
| GSM1282817 | 64 |
| GSM1282818 | 64 |
| GSM1282819 | 76 |
| GSM1282820 | 76 |
| GSM1282821 | 60 |
| GSM1299651 | 58 |
| GSM1299653 | 85 |
| GSM1299655 | 52 |
| GSM1299657 | 45 |
| GSM1299658 | 86 |
| GSM1299659 | 80 |
| GSM1299660 | 68 |
| GSM1299663 | 65 |
| GSM1299665 | 83 |
| GSM1299667 | 58 |
| GSM1299669 | 51 |
| GSM1299671 | 78 |
| GSM1299672 | 68 |
| GSM1299675 | 80 |
| GSM1299677 | 79 |
| GSM1299679 | 72 |
| GSM1299681 | 72 |
| GSM1299683 | 77 |
| GSM1299685 | 60 |
| GSM1299687 | 81 |
| GSM1299689 | 80 |
| GSM1299691 | 45 |
| GSM1299693 | 79 |
| GSM1299695 | 93 |
| GSM1299696 | 83 |
| GSM1299699 | 68 |
| GSM1299701 | 79 |
| GSM1299703 | 67 |
| GSM1299705 | 51 |

|            |    |
|------------|----|
| GSM1299707 | 73 |
| GSM1299708 | 82 |
| GSM1299711 | 75 |
| GSM1299713 | 63 |
| GSM1299715 | 65 |
| GSM1299717 | 48 |
| GSM1299719 | 53 |
| GSM1299720 | 79 |
| GSM1299723 | 76 |
| GSM1299725 | 67 |
| GSM1299727 | 83 |
| GSM1299729 | 58 |
| GSM1299731 | 65 |
| GSM1299733 | 87 |
| GSM1299735 | 64 |
| GSM1299737 | 70 |
| GSM1299739 | 79 |
| GSM1299741 | 75 |
| GSM1299743 | 67 |
| GSM1299745 | 71 |
| GSM1299746 | 85 |
| GSM1299748 | 76 |
| GSM1299749 | 65 |
| GSM1299753 | 61 |
| GSM1299756 | 69 |
| GSM1299757 | 53 |
| GSM1299758 | 77 |
| GSM1299762 | 73 |
| GSM1299763 | 63 |
| GSM1299764 | 71 |
| GSM1299767 | 55 |
| GSM1299772 | 74 |
| GSM1299775 | 58 |
| GSM1299778 | 70 |
| GSM1299780 | 68 |
| GSM1299785 | 65 |
| GSM1299788 | 63 |
| GSM1299789 | 71 |
| GSM1299790 | 59 |
| GSM1299794 | 50 |
| GSM1299795 | 77 |
| GSM1299796 | 66 |
| GSM1299799 | 73 |
| GSM1299801 | 71 |
| GSM1299802 | 57 |
| GSM1299803 | 70 |
| GSM1299804 | 54 |
| GSM1299806 | 37 |
| GSM1299807 | 77 |
| GSM1299809 | 75 |
| GSM1299813 | 72 |
| GSM1299816 | 56 |
| GSM1299818 | 82 |
| GSM1299820 | 68 |
| GSM1299821 | 76 |
| GSM1299822 | 65 |



|            |    |
|------------|----|
| GSM1299823 | 52 |
| GSM1299826 | 61 |
| GSM1299828 | 57 |
| GSM1299829 | 69 |
| GSM1299832 | 67 |
| GSM1299834 | 65 |
| GSM1299835 | 73 |
| GSM1299836 | 63 |
| GSM1299837 | 72 |
| GSM1299838 | 60 |
| GSM1299839 | 71 |
| GSM1299841 | 69 |
| GSM1300333 | 66 |
| GSM1300335 | 47 |
| GSM1300337 | 78 |
| GSM1300339 | 72 |
| GSM1300341 | 76 |
| GSM1300343 | 77 |
| GSM1300345 | 73 |
| GSM1300347 | 67 |
| GSM1300349 | 58 |
| GSM1300351 | 89 |
| GSM1300353 | 78 |
| GSM1300355 | 75 |
| GSM1300357 | 89 |
| GSM1300359 | 71 |
| GSM1300361 | 82 |
| GSM1300363 | 48 |
| GSM1300365 | 57 |
| GSM1300367 | 73 |
| GSM1300369 | 66 |
| GSM1300371 | 67 |
| GSM1300373 | 83 |
| GSM1300375 | 75 |
| GSM1300377 | 55 |
| GSM1300379 | 72 |
| GSM1300381 | 71 |
| GSM1300383 | 66 |
| GSM1300385 | 62 |
| GSM1300387 | 68 |
| GSM1300389 | 64 |
| GSM1300391 | 73 |
| GSM1300393 | 81 |
| GSM1300395 | 65 |
| GSM1300397 | 59 |
| GSM1300399 | 70 |
| GSM1300401 | 87 |
| GSM1300403 | 76 |
| GSM1300405 | 66 |
| GSM1300407 | 65 |
| GSM1300409 | 67 |
| GSM1300411 | 57 |
| GSM1300413 | 82 |
| GSM1300415 | 72 |
| GSM1300417 | 72 |
| GSM1300419 | 77 |

|            |    |
|------------|----|
| GSM1300421 | 69 |
| GSM1300423 | 73 |
| GSM1300425 | 75 |
| GSM1300427 | 71 |
| GSM1300489 | 46 |
| GSM1300491 | 72 |
| GSM1300495 | 68 |
| GSM1300497 | 68 |
| GSM1300501 | 79 |
| GSM1300503 | 70 |
| GSM1300505 | 70 |
| GSM1300507 | 78 |
| GSM1300509 | 78 |
| GSM1300511 | 76 |
| GSM1300515 | 53 |
| GSM1300517 | 63 |
| GSM1300519 | 70 |
| GSM1300521 | 47 |
| GSM1300523 | 63 |
| GSM1300525 | 78 |
| GSM1300527 | 67 |
| GSM1300529 | 68 |
| GSM1300531 | 81 |
| GSM1300533 | 78 |
| GSM1300535 | 49 |
| GSM1300537 | 60 |
| GSM1300539 | 70 |
| GSM1300541 | 59 |
| GSM1300543 | 73 |
| GSM1300545 | 61 |
| GSM1300547 | 57 |
| GSM1300549 | 56 |
| GSM1300551 | 86 |
| GSM1300553 | 86 |
| GSM1300555 | 68 |
| GSM1300557 | 77 |
| GSM1300559 | 69 |
| GSM1300561 | 46 |
| GSM1300563 | 68 |
| GSM1300565 | 86 |
| GSM1300567 | 83 |
| GSM1300569 | 69 |
| GSM1300570 | 71 |
| GSM1300571 | 65 |
| GSM1300573 | 58 |
| GSM1300575 | 62 |
| GSM1300577 | 69 |
| GSM1300579 | 64 |
| GSM1300580 | 82 |
| GSM1300581 | 64 |
| GSM1300582 | 69 |
| GSM1300583 | 73 |
| GSM1438514 | 28 |
| GSM1438515 | 24 |
| GSM1438516 | 27 |
| GSM1438517 | 50 |

|            |    |
|------------|----|
| GSM1438518 | 57 |
| GSM1438519 | 59 |
| GSM1438538 | 38 |
| GSM1438539 | 37 |
| GSM1438540 | 43 |
| GSM1438541 | 48 |
| GSM1438550 | 33 |
| GSM1438551 | 41 |
| GSM1498474 | 41 |
| GSM1498475 | 47 |
| GSM1498476 | 60 |
| GSM1498477 | 53 |
| GSM1498478 | 46 |
| GSM1498479 | 39 |
| GSM1498480 | 56 |
| GSM1498481 | 49 |
| GSM1498482 | 62 |
| GSM1498483 | 56 |
| GSM1498484 | 63 |
| GSM1498485 | 57 |
| GSM1498486 | 63 |
| GSM1498487 | 57 |
| GSM1498488 | 59 |
| GSM1498489 | 65 |
| GSM1498490 | 74 |
| GSM1498491 | 68 |
| GSM1498492 | 46 |
| GSM1498493 | 39 |
| GSM1498494 | 47 |
| GSM1498495 | 54 |
| GSM1498496 | 63 |
| GSM1498497 | 57 |
| GSM1498498 | 59 |
| GSM1498499 | 66 |
| GSM1498500 | 58 |
| GSM1498501 | 52 |
| GSM1498502 | 41 |
| GSM1498503 | 35 |
| GSM1498504 | 56 |
| GSM1498505 | 50 |
| GSM1498506 | 61 |
| GSM1498507 | 68 |
| GSM1498508 | 48 |
| GSM1498509 | 54 |
| GSM1498510 | 60 |
| GSM1498511 | 66 |
| GSM1498512 | 73 |
| GSM1498513 | 66 |
| GSM1498514 | 47 |
| GSM1498515 | 41 |
| GSM1498516 | 48 |
| GSM1498517 | 54 |
| GSM1498518 | 55 |
| GSM1498519 | 61 |
| GSM1498522 | 52 |
| GSM1498523 | 58 |

|            |    |
|------------|----|
| GSM1498524 | 54 |
| GSM1498525 | 48 |
| GSM1498526 | 64 |
| GSM1498527 | 58 |
| GSM1498528 | 46 |
| GSM1498529 | 52 |
| GSM1498530 | 70 |
| GSM1498531 | 64 |
| GSM1498532 | 72 |
| GSM1498533 | 66 |
| GSM1498534 | 52 |
| GSM1498535 | 58 |
| GSM1498536 | 48 |
| GSM1498537 | 42 |
| GSM1498538 | 49 |
| GSM1498539 | 55 |
| GSM1498540 | 62 |
| GSM1498541 | 56 |
| GSM1498542 | 47 |
| GSM1498543 | 53 |
| GSM1498544 | 47 |
| GSM1498545 | 53 |
| GSM1498546 | 57 |
| GSM1498547 | 51 |
| GSM1498548 | 35 |
| GSM1498549 | 42 |
| GSM1498550 | 69 |
| GSM1498551 | 63 |
| GSM1498552 | 57 |
| GSM1498553 | 51 |
| GSM1498554 | 83 |
| GSM1498555 | 77 |
| GSM1498556 | 62 |
| GSM1498557 | 57 |
| GSM1498558 | 46 |
| GSM1498559 | 52 |
| GSM1498560 | 59 |
| GSM1498561 | 65 |
| GSM1498562 | 57 |
| GSM1498563 | 52 |
| GSM1498564 | 61 |
| GSM1498565 | 67 |
| GSM1498566 | 45 |
| GSM1498567 | 39 |
| GSM1498568 | 61 |
| GSM1498569 | 67 |
| GSM1498570 | 60 |
| GSM1498571 | 66 |
| GSM1498572 | 66 |
| GSM1498573 | 60 |
| GSM1498574 | 42 |
| GSM1498575 | 48 |
| GSM1498576 | 49 |
| GSM1498577 | 54 |
| GSM1498578 | 66 |
| GSM1498579 | 60 |

|            |    |
|------------|----|
| GSM1498580 | 57 |
| GSM1498581 | 63 |
| GSM1498582 | 55 |
| GSM1498583 | 49 |
| GSM1498584 | 52 |
| GSM1498585 | 46 |
| GSM1498586 | 42 |
| GSM1498587 | 36 |
| GSM1498588 | 61 |
| GSM1498589 | 56 |
| GSM1498590 | 59 |
| GSM1498591 | 53 |
| GSM1498592 | 73 |
| GSM1498593 | 67 |
| GSM1498594 | 53 |
| GSM1498595 | 47 |
| GSM1498596 | 59 |
| GSM1498597 | 53 |
| GSM1498598 | 51 |
| GSM1498599 | 57 |
| GSM1498600 | 62 |
| GSM1498601 | 68 |
| GSM1498602 | 66 |
| GSM1498603 | 60 |
| GSM1498604 | 63 |
| GSM1498605 | 69 |
| GSM1498606 | 70 |
| GSM1498607 | 64 |
| GSM1498608 | 47 |
| GSM1498609 | 53 |
| GSM1498610 | 50 |
| GSM1498611 | 45 |
| GSM1498612 | 43 |
| GSM1498613 | 49 |
| GSM1498616 | 47 |
| GSM1498617 | 53 |
| GSM1498618 | 46 |
| GSM1498619 | 51 |
| GSM1498620 | 54 |
| GSM1498621 | 60 |
| GSM1498622 | 74 |
| GSM1498623 | 68 |
| GSM1498624 | 66 |
| GSM1498625 | 60 |
| GSM1498626 | 63 |
| GSM1498627 | 57 |
| GSM1498628 | 55 |
| GSM1498629 | 61 |
| GSM1498630 | 70 |
| GSM1498631 | 64 |
| GSM1498632 | 60 |
| GSM1498633 | 54 |
| GSM1498634 | 51 |
| GSM1498635 | 45 |
| GSM1498636 | 59 |
| GSM1498637 | 53 |

|            |    |
|------------|----|
| GSM1498638 | 51 |
| GSM1498639 | 46 |
| GSM1498640 | 40 |
| GSM1498641 | 46 |
| GSM1498642 | 64 |
| GSM1498643 | 58 |
| GSM1498644 | 53 |
| GSM1498645 | 58 |
| GSM1498646 | 52 |
| GSM1498647 | 58 |
| GSM1498648 | 76 |
| GSM1498649 | 70 |
| GSM1498650 | 56 |
| GSM1498651 | 50 |
| GSM1498652 | 72 |
| GSM1498653 | 78 |
| GSM1498654 | 55 |
| GSM1498655 | 49 |
| GSM1498656 | 57 |
| GSM1498657 | 51 |
| GSM1498658 | 48 |
| GSM1498659 | 53 |
| GSM1498660 | 62 |
| GSM1498661 | 56 |
| GSM1506276 | 74 |
| GSM1506277 | 71 |
| GSM1506278 | 71 |
| GSM1506279 | 70 |
| GSM1506280 | 70 |
| GSM1506281 | 70 |
| GSM1506282 | 73 |
| GSM1506283 | 71 |
| GSM1506284 | 71 |
| GSM1506285 | 70 |
| GSM1506286 | 70 |
| GSM1506287 | 70 |
| GSM1506288 | 70 |
| GSM1506289 | 68 |
| GSM1506290 | 68 |
| GSM1506291 | 67 |
| GSM1506292 | 66 |
| GSM1506293 | 66 |
| GSM1506294 | 70 |
| GSM1506295 | 68 |
| GSM1506296 | 68 |
| GSM1506297 | 67 |
| GSM1506298 | 66 |
| GSM1506299 | 66 |
| GSM1506300 | 66 |
| GSM1506301 | 65 |
| GSM1506302 | 65 |
| GSM1506303 | 64 |
| GSM1506304 | 63 |
| GSM1506305 | 63 |
| GSM1506306 | 66 |
| GSM1506307 | 65 |

|            |    |
|------------|----|
| GSM1506308 | 65 |
| GSM1506309 | 64 |
| GSM1506310 | 63 |
| GSM1506311 | 63 |
| GSM1506312 | 63 |
| GSM1506313 | 62 |
| GSM1506314 | 62 |
| GSM1506315 | 63 |
| GSM1506316 | 62 |
| GSM1506318 | 63 |
| GSM1506319 | 62 |
| GSM1506320 | 62 |
| GSM1506321 | 63 |
| GSM1506322 | 62 |
| GSM1506324 | 62 |
| GSM1506325 | 62 |
| GSM1506326 | 60 |
| GSM1506327 | 35 |
| GSM1506328 | 60 |
| GSM1506329 | 60 |
| GSM1506330 | 62 |
| GSM1506331 | 62 |
| GSM1506332 | 60 |
| GSM1506333 | 35 |
| GSM1506334 | 60 |
| GSM1506335 | 60 |
| GSM1506336 | 60 |
| GSM1506337 | 60 |
| GSM1506338 | 60 |
| GSM1506339 | 59 |
| GSM1506340 | 59 |
| GSM1506341 | 59 |
| GSM1506342 | 60 |
| GSM1506343 | 60 |
| GSM1506344 | 60 |
| GSM1506345 | 60 |
| GSM1506346 | 59 |
| GSM1506347 | 59 |
| GSM1506348 | 31 |
| GSM1506349 | 31 |
| GSM1506350 | 31 |
| GSM1506351 | 31 |
| GSM1506352 | 31 |
| GSM1506353 | 30 |
| GSM1506354 | 31 |
| GSM1506355 | 31 |
| GSM1506356 | 32 |
| GSM1506357 | 31 |
| GSM1506358 | 31 |
| GSM1506359 | 30 |
| GSM1506360 | 74 |
| GSM1506361 | 68 |
| GSM1506362 | 67 |
| GSM1506363 | 66 |
| GSM1506364 | 65 |
| GSM1506365 | 65 |

|            |    |
|------------|----|
| GSM1506366 | 74 |
| GSM1506367 | 68 |
| GSM1506368 | 67 |
| GSM1506369 | 66 |
| GSM1506370 | 65 |
| GSM1506371 | 65 |
| GSM1506372 | 58 |
| GSM1506373 | 57 |
| GSM1506374 | 57 |
| GSM1506375 | 57 |
| GSM1506376 | 57 |
| GSM1506377 | 36 |
| GSM1506378 | 58 |
| GSM1506379 | 57 |
| GSM1506380 | 58 |
| GSM1506381 | 57 |
| GSM1506382 | 57 |
| GSM1506383 | 36 |
| GSM1506384 | 36 |
| GSM1506385 | 36 |
| GSM1506386 | 36 |
| GSM1506387 | 35 |
| GSM1506388 | 35 |
| GSM1506389 | 35 |
| GSM1506390 | 36 |
| GSM1506391 | 36 |
| GSM1506392 | 36 |
| GSM1506393 | 35 |
| GSM1506394 | 35 |
| GSM1506395 | 35 |
| GSM1506396 | 34 |
| GSM1506397 | 34 |
| GSM1506398 | 34 |
| GSM1506399 | 34 |
| GSM1506400 | 34 |
| GSM1506401 | 34 |
| GSM1506402 | 34 |
| GSM1506403 | 34 |
| GSM1506404 | 34 |
| GSM1506405 | 34 |
| GSM1506406 | 34 |
| GSM1506407 | 34 |
| GSM1506408 | 33 |
| GSM1506409 | 33 |
| GSM1506410 | 33 |
| GSM1506411 | 33 |
| GSM1506412 | 32 |
| GSM1506413 | 32 |
| GSM1506414 | 33 |
| GSM1506415 | 33 |
| GSM1506416 | 32 |
| GSM1506417 | 33 |
| GSM1506418 | 32 |
| GSM1506419 | 32 |
| GSM1506420 | 32 |
| GSM1506421 | 32 |



|            |    |
|------------|----|
| GSM1506422 | 31 |
| GSM1506423 | 31 |
| GSM1506424 | 31 |
| GSM1506425 | 31 |
| GSM1506426 | 32 |
| GSM1506427 | 32 |
| GSM1506428 | 31 |
| GSM1506429 | 31 |
| GSM1506430 | 31 |
| GSM1506431 | 31 |
| GSM1506432 | 35 |
| GSM1506433 | 30 |
| GSM1506434 | 30 |
| GSM1506435 | 30 |
| GSM1506436 | 30 |
| GSM1506437 | 30 |
| GSM1506438 | 35 |
| GSM1506439 | 30 |
| GSM1506440 | 30 |
| GSM1506441 | 30 |
| GSM1506442 | 30 |
| GSM1506443 | 30 |
| GSM1506444 | 30 |
| GSM1506445 | 68 |
| GSM1506446 | 66 |
| GSM1506447 | 65 |
| GSM1506448 | 64 |
| GSM1506449 | 64 |
| GSM1506450 | 30 |
| GSM1506451 | 68 |
| GSM1506452 | 66 |
| GSM1506453 | 65 |
| GSM1506454 | 64 |
| GSM1506455 | 64 |
| GSM1506456 | 34 |
| GSM1506457 | 35 |
| GSM1506458 | 35 |
| GSM1506459 | 31 |
| GSM1506460 | 31 |
| GSM1506461 | 67 |
| GSM1506462 | 36 |
| GSM1506463 | 35 |
| GSM1506464 | 35 |
| GSM1506465 | 31 |
| GSM1506466 | 31 |
| GSM1506467 | 67 |
| GSM1506468 | 64 |
| GSM1506469 | 63 |
| GSM1506470 | 63 |
| GSM1506471 | 62 |
| GSM1506472 | 62 |
| GSM1506473 | 62 |
| GSM1506474 | 64 |
| GSM1506475 | 63 |
| GSM1506476 | 63 |
| GSM1506477 | 62 |

|            |    |
|------------|----|
| GSM1506478 | 62 |
| GSM1506479 | 62 |
| GSM1506480 | 61 |
| GSM1506481 | 61 |
| GSM1506482 | 61 |
| GSM1506483 | 61 |
| GSM1506484 | 61 |
| GSM1506485 | 61 |
| GSM1506486 | 61 |
| GSM1506487 | 61 |
| GSM1506488 | 61 |
| GSM1506489 | 61 |
| GSM1506490 | 61 |
| GSM1506491 | 61 |
| GSM1506492 | 60 |
| GSM1506493 | 59 |
| GSM1506494 | 35 |
| GSM1506495 | 59 |
| GSM1506496 | 58 |
| GSM1506497 | 58 |
| GSM1506498 | 60 |
| GSM1506499 | 59 |
| GSM1506500 | 35 |
| GSM1506501 | 59 |
| GSM1506502 | 58 |
| GSM1506503 | 57 |
| GSM1506504 | 37 |
| GSM1506505 | 36 |
| GSM1506506 | 36 |
| GSM1506507 | 36 |
| GSM1506508 | 36 |
| GSM1506509 | 36 |
| GSM1506510 | 37 |
| GSM1506511 | 36 |
| GSM1506512 | 36 |
| GSM1506513 | 36 |
| GSM1506514 | 36 |
| GSM1506515 | 36 |
| GSM1506516 | 34 |
| GSM1506517 | 34 |
| GSM1506518 | 33 |
| GSM1506519 | 34 |
| GSM1506520 | 33 |
| GSM1506521 | 33 |
| GSM1506522 | 34 |
| GSM1506523 | 34 |
| GSM1506524 | 33 |
| GSM1506525 | 34 |
| GSM1506526 | 33 |
| GSM1506527 | 33 |
| GSM1506528 | 33 |
| GSM1506529 | 33 |
| GSM1506530 | 32 |
| GSM1506531 | 32 |
| GSM1506532 | 31 |
| GSM1506533 | 32 |

|            |    |
|------------|----|
| GSM1506534 | 33 |
| GSM1506535 | 32 |
| GSM1506536 | 32 |
| GSM1506537 | 32 |
| GSM1506538 | 31 |
| GSM1506539 | 31 |
| GSM1506540 | 64 |
| GSM1506541 | 64 |
| GSM1506542 | 63 |
| GSM1506543 | 60 |
| GSM1506544 | 59 |
| GSM1506545 | 57 |
| GSM1506546 | 64 |
| GSM1506547 | 64 |
| GSM1506548 | 63 |
| GSM1506549 | 60 |
| GSM1506550 | 59 |
| GSM1506551 | 57 |
| GSM1506552 | 36 |
| GSM1506553 | 35 |
| GSM1506554 | 35 |
| GSM1506555 | 34 |
| GSM1506556 | 34 |
| GSM1506557 | 33 |
| GSM1506558 | 36 |
| GSM1506559 | 35 |
| GSM1506560 | 35 |
| GSM1506561 | 34 |
| GSM1506562 | 34 |
| GSM1506563 | 33 |
| GSM1506564 | 33 |
| GSM1506565 | 33 |
| GSM1506566 | 33 |
| GSM1506567 | 31 |
| GSM1506568 | 30 |
| GSM1506569 | 69 |
| GSM1506570 | 33 |
| GSM1506571 | 33 |
| GSM1506572 | 33 |
| GSM1506573 | 31 |
| GSM1506574 | 30 |
| GSM1506575 | 69 |
| GSM1506576 | 60 |
| GSM1506577 | 32 |
| GSM1506578 | 62 |
| GSM1506579 | 35 |
| GSM1506580 | 60 |
| GSM1506581 | 71 |
| GSM1506582 | 60 |
| GSM1506583 | 32 |
| GSM1506584 | 62 |
| GSM1506585 | 35 |
| GSM1506586 | 60 |
| GSM1506587 | 71 |
| GSM1572503 | 46 |
| GSM1572504 | 41 |

|            |    |
|------------|----|
| GSM1572505 | 42 |
| GSM1572506 | 48 |
| GSM1572507 | 42 |
| GSM1572508 | 43 |
| GSM1572509 | 42 |
| GSM1572510 | 51 |
| GSM1572511 | 37 |
| GSM1572512 | 43 |
| GSM1572513 | 44 |
| GSM1572514 | 35 |
| GSM1572515 | 44 |
| GSM1572516 | 44 |
| GSM1572517 | 47 |
| GSM1572518 | 53 |
| GSM1572519 | 45 |
| GSM1572520 | 46 |
| GSM1572521 | 40 |
| GSM1572522 | 45 |
| GSM1572523 | 47 |
| GSM1572524 | 54 |
| GSM1572525 | 36 |
| GSM1572526 | 40 |
| GSM1572527 | 47 |
| GSM1572528 | 36 |
| GSM1572529 | 41 |
| GSM1572530 | 47 |
| GSM1572531 | 46 |
| GSM1572532 | 47 |
| GSM1572533 | 41 |
| GSM1572534 | 43 |
| GSM1572535 | 46 |
| GSM1572536 | 47 |
| GSM1572537 | 55 |
| GSM1572538 | 53 |
| GSM1572539 | 48 |
| GSM1572540 | 53 |
| GSM1572541 | 50 |
| GSM1572542 | 60 |
| GSM1572543 | 49 |
| GSM1572544 | 51 |
| GSM1572545 | 52 |
| GSM1572546 | 55 |
| GSM1572547 | 53 |
| GSM1572548 | 56 |
| GSM1572549 | 57 |
| GSM1572550 | 61 |
| GSM1572551 | 56 |
| GSM1572552 | 53 |
| GSM1572553 | 59 |
| GSM1572554 | 51 |
| GSM1572555 | 58 |
| GSM1572556 | 51 |
| GSM1572557 | 54 |
| GSM1572558 | 60 |
| GSM1572559 | 53 |
| GSM1572560 | 55 |

|            |    |
|------------|----|
| GSM1572561 | 61 |
| GSM1572562 | 56 |
| GSM1572563 | 55 |
| GSM1572564 | 60 |
| GSM1572565 | 74 |
| GSM1572566 | 50 |
| GSM1572567 | 40 |
| GSM1572568 | 11 |
| GSM1572570 | 7  |
| GSM1572571 | 3  |
| GSM1572572 | 2  |
| GSM1572573 | 53 |
| GSM1572574 | 10 |
| GSM1572575 | 7  |
| GSM1572576 | 42 |
| GSM1572577 | 36 |
| GSM1572578 | 9  |
| GSM1572579 | 38 |
| GSM1572581 | 41 |
| GSM1572583 | 38 |
| GSM1572584 | 37 |
| GSM1572585 | 24 |
| GSM1572587 | 35 |
| GSM1572588 | 34 |
| GSM1572590 | 47 |
| GSM1572591 | 35 |
| GSM1572592 | 3  |
| GSM1572594 | 70 |
| GSM1572596 | 6  |
| GSM1572597 | 24 |
| GSM1572598 | 37 |
| GSM1572599 | 7  |
| GSM1572600 | 5  |
| GSM1572601 | 47 |
| GSM1572602 | 32 |
| GSM1572603 | 34 |
| GSM1572604 | 4  |
| GSM1572605 | 37 |
| GSM1572606 | 35 |
| GSM1572607 | 11 |
| GSM1572608 | 9  |
| GSM1572609 | 7  |
| GSM1572610 | 5  |
| GSM1572611 | 2  |
| GSM1572612 | 36 |
| GSM1572613 | 49 |
| GSM1572614 | 4  |
| GSM1572615 | 7  |
| GSM1602316 | 26 |
| GSM1602317 | 26 |
| GSM1602318 | 30 |
| GSM1602319 | 30 |
| GSM1602320 | 32 |
| GSM1602321 | 32 |
| GSM1602322 | 22 |
| GSM1602323 | 22 |

|            |    |
|------------|----|
| GSM1602324 | 21 |
| GSM1602325 | 21 |
| GSM1602326 | 32 |
| GSM1602327 | 32 |
| GSM1602328 | 25 |
| GSM1602329 | 25 |
| GSM1602330 | 22 |
| GSM1602331 | 22 |
| GSM1655185 | 46 |
| GSM1655187 | 41 |
| GSM1655188 | 48 |
| GSM1655190 | 42 |
| GSM1655192 | 43 |
| GSM1655193 | 42 |
| GSM1655194 | 51 |
| GSM1655196 | 37 |
| GSM1655197 | 43 |
| GSM1655198 | 44 |
| GSM1655200 | 35 |
| GSM1655201 | 44 |
| GSM1655203 | 44 |
| GSM1655204 | 47 |
| GSM1655205 | 53 |
| GSM1655207 | 46 |
| GSM1655209 | 40 |
| GSM1655210 | 45 |
| GSM1655211 | 47 |
| GSM1655212 | 54 |
| GSM1655214 | 36 |
| GSM1655215 | 40 |
| GSM1655216 | 47 |
| GSM1655217 | 36 |
| GSM1655218 | 41 |
| GSM1655219 | 47 |
| GSM1655220 | 47 |
| GSM1655222 | 41 |
| GSM1655223 | 43 |
| GSM1655224 | 46 |
| GSM1655225 | 47 |
| GSM1655226 | 55 |
| GSM1655227 | 62 |
| GSM1655228 | 53 |
| GSM1655229 | 48 |
| GSM1655230 | 53 |
| GSM1655232 | 64 |
| GSM1655235 | 63 |
| GSM1655238 | 62 |
| GSM1655240 | 50 |
| GSM1655243 | 60 |
| GSM1655245 | 49 |
| GSM1655248 | 51 |
| GSM1655251 | 52 |
| GSM1655254 | 55 |
| GSM1655256 | 53 |
| GSM1655259 | 64 |
| GSM1655261 | 56 |

|            |    |
|------------|----|
| GSM1655264 | 57 |
| GSM1655268 | 61 |
| GSM1655270 | 56 |
| GSM1655273 | 53 |
| GSM1655275 | 59 |
| GSM1655276 | 51 |
| GSM1655277 | 62 |
| GSM1655278 | 58 |
| GSM1655279 | 51 |
| GSM1655280 | 54 |
| GSM1655281 | 63 |
| GSM1655282 | 60 |
| GSM1655283 | 62 |
| GSM1655284 | 53 |
| GSM1655285 | 55 |
| GSM1655286 | 61 |
| GSM1655287 | 56 |
| GSM1655288 | 63 |
| GSM1655289 | 55 |
| GSM1655290 | 60 |
| GSM1655291 | 62 |
| GSM1870132 | 37 |
| GSM1870133 | 41 |
| GSM1870134 | 46 |
| GSM1870135 | 61 |
| GSM1870136 | 62 |
| GSM1870137 | 63 |
| GSM1870138 | 66 |
| GSM1870139 | 67 |
| GSM1870140 | 80 |
| GSM1870141 | 41 |
| GSM1870142 | 42 |
| GSM1870143 | 48 |
| GSM1870144 | 62 |
| GSM1870145 | 62 |
| GSM1870146 | 63 |
| GSM1870147 | 65 |
| GSM1870148 | 66 |
| GSM1870149 | 67 |
| GSM1870150 | 39 |
| GSM1870151 | 42 |
| GSM1870152 | 62 |
| GSM1870153 | 63 |
| GSM1870154 | 63 |
| GSM1870155 | 66 |
| GSM1870156 | 68 |
| GSM1870157 | 71 |
| GSM1870158 | 73 |
| GSM1870159 | 42 |
| GSM1870160 | 43 |
| GSM1870161 | 42 |
| GSM1870162 | 51 |
| GSM1870163 | 64 |
| GSM1870164 | 67 |
| GSM1870165 | 69 |
| GSM1870166 | 72 |

|            |    |
|------------|----|
| GSM1870167 | 73 |
| GSM1870168 | 37 |
| GSM1870169 | 43 |
| GSM1870170 | 44 |
| GSM1870171 | 44 |
| GSM1870172 | 65 |
| GSM1870173 | 71 |
| GSM1870174 | 72 |
| GSM1870175 | 73 |
| GSM1870176 | 73 |
| GSM1870177 | 35 |
| GSM1870178 | 44 |
| GSM1870179 | 45 |
| GSM1870180 | 66 |
| GSM1870181 | 68 |
| GSM1870182 | 73 |
| GSM1870183 | 75 |
| GSM1870184 | 76 |
| GSM1870185 | 44 |
| GSM1870186 | 47 |
| GSM1870187 | 47 |
| GSM1870188 | 52 |
| GSM1870189 | 53 |
| GSM1870190 | 72 |
| GSM1870191 | 77 |
| GSM1870192 | 77 |
| GSM1870193 | 82 |
| GSM1870194 | 86 |
| GSM1870195 | 45 |
| GSM1870196 | 46 |
| GSM1870197 | 49 |
| GSM1870198 | 63 |
| GSM1870199 | 71 |
| GSM1870200 | 74 |
| GSM1870201 | 77 |
| GSM1870202 | 86 |
| GSM1870203 | 87 |
| GSM1870204 | 88 |
| GSM1870205 | 40 |
| GSM1870206 | 45 |
| GSM1870207 | 47 |
| GSM1870208 | 50 |
| GSM1870209 | 52 |
| GSM1870210 | 54 |
| GSM1870211 | 64 |
| GSM1870212 | 72 |
| GSM1870213 | 75 |
| GSM1870214 | 78 |
| GSM1870215 | 90 |
| GSM1870216 | 36 |
| GSM1870217 | 40 |
| GSM1870218 | 47 |
| GSM1870219 | 51 |
| GSM1870220 | 78 |
| GSM1870221 | 38 |
| GSM1870222 | 36 |



|            |    |
|------------|----|
| GSM1870223 | 41 |
| GSM1870224 | 47 |
| GSM1870225 | 46 |
| GSM1870226 | 47 |
| GSM1870227 | 57 |
| GSM1870228 | 60 |
| GSM1870229 | 41 |
| GSM1870230 | 43 |
| GSM1870231 | 46 |
| GSM1870232 | 47 |
| GSM1870233 | 58 |
| GSM1870234 | 80 |
| GSM1870235 | 73 |
| GSM1870236 | 71 |
| GSM1870237 | 72 |
| GSM1870238 | 79 |
| GSM1870239 | 86 |
| GSM1870240 | 71 |
| GSM1870241 | 79 |
| GSM1870242 | 68 |
| GSM1870243 | 77 |
| GSM1870244 | 75 |
| GSM1870245 | 55 |
| GSM1870246 | 68 |
| GSM1870247 | 62 |
| GSM1870248 | 74 |
| GSM1870249 | 70 |
| GSM1870250 | 53 |
| GSM1870251 | 73 |
| GSM1870252 | 70 |
| GSM1870253 | 81 |
| GSM1870254 | 66 |
| GSM1870255 | 65 |
| GSM1870256 | 48 |
| GSM1870257 | 53 |
| GSM1870258 | 67 |
| GSM1870259 | 64 |
| GSM1870260 | 63 |
| GSM1870261 | 76 |
| GSM1870262 | 75 |
| GSM1870263 | 69 |
| GSM1870264 | 62 |
| GSM1870265 | 68 |
| GSM1870266 | 67 |
| GSM1870267 | 66 |
| GSM1870268 | 87 |
| GSM1870269 | 81 |
| GSM1870270 | 50 |
| GSM1870271 | 60 |
| GSM1870272 | 49 |
| GSM1870273 | 73 |
| GSM1870274 | 79 |
| GSM1870275 | 76 |
| GSM1870276 | 68 |
| GSM1870277 | 77 |
| GSM1870278 | 80 |

|            |    |
|------------|----|
| GSM1870279 | 51 |
| GSM1870280 | 52 |
| GSM1870281 | 77 |
| GSM1870282 | 79 |
| GSM1870283 | 55 |
| GSM1870284 | 74 |
| GSM1870285 | 69 |
| GSM1870286 | 79 |
| GSM1870287 | 65 |
| GSM1870288 | 74 |
| GSM1870289 | 53 |
| GSM1870290 | 64 |
| GSM1870291 | 76 |
| GSM1870292 | 56 |
| GSM1870293 | 57 |
| GSM1870294 | 65 |
| GSM1870295 | 70 |
| GSM1870296 | 61 |
| GSM1870297 | 56 |
| GSM1870298 | 81 |
| GSM1870299 | 74 |
| GSM1870300 | 81 |
| GSM1870301 | 53 |
| GSM1870302 | 70 |
| GSM1870303 | 59 |
| GSM1870304 | 89 |
| GSM1870305 | 76 |
| GSM1870306 | 51 |
| GSM1870307 | 87 |
| GSM1870308 | 62 |
| GSM1870309 | 73 |
| GSM1870310 | 58 |
| GSM1870311 | 51 |
| GSM1870312 | 84 |
| GSM1870313 | 85 |
| GSM1870314 | 54 |
| GSM1870315 | 71 |
| GSM1870316 | 76 |
| GSM1870317 | 76 |
| GSM1870318 | 69 |
| GSM1870319 | 81 |
| GSM1870320 | 82 |
| GSM1870321 | 71 |
| GSM1870322 | 68 |
| GSM1870323 | 68 |
| GSM1870324 | 74 |
| GSM1870325 | 78 |
| GSM1870326 | 73 |
| GSM1870327 | 71 |
| GSM1870328 | 71 |
| GSM1870329 | 67 |
| GSM1870330 | 76 |
| GSM1870331 | 75 |
| GSM1870332 | 73 |
| GSM1870333 | 77 |
| GSM1870334 | 83 |

|            |    |
|------------|----|
| GSM1870335 | 71 |
| GSM1870336 | 67 |
| GSM1870337 | 79 |
| GSM1870338 | 76 |
| GSM1870339 | 80 |
| GSM1870340 | 69 |
| GSM1870341 | 78 |
| GSM1870342 | 77 |
| GSM1870343 | 72 |
| GSM1870344 | 72 |
| GSM1870345 | 76 |
| GSM1870346 | 63 |
| GSM1870347 | 89 |
| GSM1870348 | 74 |
| GSM1870349 | 76 |
| GSM1870350 | 72 |
| GSM1870351 | 69 |
| GSM1870352 | 75 |
| GSM1870353 | 77 |
| GSM1870354 | 68 |
| GSM1870355 | 75 |
| GSM1870356 | 77 |
| GSM1870357 | 68 |
| GSM1870358 | 65 |
| GSM1870359 | 77 |
| GSM1870360 | 81 |
| GSM1870361 | 76 |
| GSM1870362 | 73 |
| GSM1870363 | 72 |
| GSM1870364 | 68 |
| GSM1870365 | 82 |
| GSM1870366 | 83 |
| GSM1870367 | 76 |
| GSM1870368 | 83 |
| GSM1870369 | 71 |
| GSM1870370 | 75 |
| GSM1870371 | 76 |
| GSM1870372 | 73 |
| GSM1870373 | 68 |
| GSM1870374 | 79 |
| GSM1870375 | 78 |
| GSM1870376 | 77 |
| GSM1870377 | 69 |
| GSM1870378 | 69 |
| GSM1870379 | 74 |
| GSM1870380 | 73 |
| GSM1870381 | 81 |
| GSM1870382 | 75 |
| GSM1870383 | 67 |
| GSM1870384 | 69 |
| GSM1870385 | 74 |
| GSM1870386 | 80 |
| GSM1870387 | 86 |
| GSM1870388 | 77 |
| GSM1870389 | 76 |
| GSM1870390 | 77 |

|            |    |
|------------|----|
| GSM1870391 | 78 |
| GSM1870392 | 80 |
| GSM1870393 | 86 |
| GSM1870394 | 73 |
| GSM1870395 | 60 |
| GSM1870396 | 81 |
| GSM1870397 | 79 |
| GSM1870398 | 77 |
| GSM1870399 | 62 |
| GSM1870400 | 53 |
| GSM1870401 | 55 |
| GSM1870402 | 61 |
| GSM1870403 | 92 |
| GSM1870404 | 56 |
| GSM1870405 | 86 |
| GSM1870406 | 78 |
| GSM1870407 | 84 |
| GSM1870408 | 71 |
| GSM1870409 | 86 |
| GSM1870410 | 82 |
| GSM1870411 | 77 |
| GSM1870412 | 72 |
| GSM1870413 | 55 |
| GSM1870414 | 81 |
| GSM1870415 | 60 |
| GSM1870416 | 73 |
| GSM1870417 | 72 |
| GSM1870418 | 69 |
| GSM1870419 | 79 |
| GSM1870420 | 71 |
| GSM1870421 | 72 |
| GSM1870422 | 62 |
| GSM1870423 | 74 |
| GSM1870424 | 50 |
| GSM1870425 | 40 |
| GSM1870426 | 53 |
| GSM1870427 | 42 |
| GSM1870428 | 36 |
| GSM1870429 | 38 |
| GSM1870430 | 41 |
| GSM1870431 | 38 |
| GSM1870432 | 37 |
| GSM1870433 | 47 |
| GSM1870434 | 70 |
| GSM1870435 | 42 |
| GSM1870436 | 38 |
| GSM1870437 | 37 |
| GSM1870438 | 35 |
| GSM1870439 | 36 |
| GSM1870440 | 49 |
| GSM1870441 | 42 |
| GSM1870950 | 37 |
| GSM1870951 | 65 |
| GSM1870952 | 72 |
| GSM1870953 | 70 |
| GSM1870954 | 75 |

|            |    |
|------------|----|
| GSM1870955 | 49 |
| GSM1870956 | 70 |
| GSM1870957 | 72 |
| GSM1870958 | 73 |
| GSM1870959 | 77 |
| GSM1870960 | 37 |
| GSM1870961 | 43 |
| GSM1870962 | 49 |
| GSM1870963 | 53 |
| GSM1870964 | 59 |
| GSM1870965 | 70 |
| GSM1870966 | 74 |
| GSM1870967 | 37 |
| GSM1870968 | 48 |
| GSM1870969 | 50 |
| GSM1870970 | 56 |
| GSM1870971 | 62 |
| GSM1870972 | 67 |
| GSM1870973 | 67 |
| GSM1870974 | 69 |
| GSM1870975 | 45 |
| GSM1870976 | 49 |
| GSM1870977 | 66 |
| GSM1870978 | 70 |
| GSM1870979 | 76 |
| GSM1870980 | 43 |
| GSM1870981 | 64 |
| GSM1870982 | 71 |
| GSM1870983 | 71 |
| GSM1870984 | 41 |
| GSM1870985 | 48 |
| GSM1870986 | 57 |
| GSM1870987 | 72 |
| GSM1870988 | 74 |
| GSM1870989 | 62 |
| GSM1870990 | 73 |
| GSM1870991 | 73 |
| GSM1870992 | 74 |
| GSM1870993 | 42 |
| GSM1870994 | 47 |
| GSM1870995 | 48 |
| GSM1870996 | 53 |
| GSM1870997 | 54 |
| GSM1870998 | 49 |
| GSM1870999 | 58 |
| GSM1871000 | 60 |
| GSM1871001 | 75 |
| GSM1871002 | 63 |
| GSM1871003 | 73 |
| GSM1871004 | 73 |
| GSM1871005 | 87 |
| GSM1871006 | 79 |
| GSM1871007 | 78 |
| GSM1871008 | 85 |
| GSM1871009 | 58 |
| GSM1871010 | 87 |

|            |    |
|------------|----|
| GSM1871011 | 74 |
| GSM1871012 | 81 |
| GSM1871013 | 53 |
| GSM1871014 | 74 |
| GSM1871015 | 82 |
| GSM1871016 | 71 |
| GSM1871017 | 73 |
| GSM1871018 | 78 |
| GSM1871019 | 66 |
| GSM1871020 | 58 |
| GSM1871021 | 68 |
| GSM1871022 | 67 |
| GSM1871023 | 76 |
| GSM1871024 | 77 |
| GSM1871025 | 70 |
| GSM1871026 | 75 |
| GSM1871027 | 80 |
| GSM1871028 | 57 |
| GSM1871029 | 73 |
| GSM1871030 | 64 |
| GSM1871031 | 83 |
| GSM1871032 | 78 |
| GSM1871033 | 64 |
| GSM1871034 | 63 |
| GSM1871035 | 79 |
| GSM1871036 | 63 |
| GSM1871037 | 63 |
| GSM1871038 | 78 |
| GSM1871039 | 77 |
| GSM1871040 | 81 |
| GSM1871041 | 70 |
| GSM1871042 | 76 |
| GSM1871043 | 78 |
| GSM1871044 | 60 |
| GSM1871045 | 88 |
| GSM1871046 | 82 |
| GSM1871047 | 73 |
| GSM1871048 | 81 |
| GSM1871049 | 72 |
| GSM1871050 | 63 |
| GSM1871051 | 86 |
| GSM1871052 | 82 |
| GSM1871053 | 65 |
| GSM1871054 | 70 |
| GSM1871055 | 84 |
| GSM1871056 | 78 |
| GSM1871057 | 50 |
| GSM1871058 | 78 |
| GSM1871059 | 50 |
| GSM1871060 | 61 |
| GSM1871061 | 69 |
| GSM1871062 | 71 |
| GSM1871063 | 72 |
| GSM1871064 | 68 |
| GSM1871065 | 69 |
| GSM1871066 | 76 |

|            |    |
|------------|----|
| GSM1871067 | 78 |
| GSM1871068 | 74 |
| GSM1871069 | 61 |
| GSM1871070 | 81 |
| GSM1871071 | 69 |
| GSM1871072 | 53 |
| GSM1871073 | 85 |
| GSM1871074 | 76 |
| GSM1871075 | 58 |
| GSM1871076 | 78 |
| GSM1871077 | 78 |
| GSM1871078 | 63 |
| GSM1871079 | 60 |
| GSM1871080 | 56 |
| GSM1871081 | 75 |
| GSM1871082 | 76 |
| GSM1871083 | 72 |
| GSM1871084 | 69 |
| GSM1871085 | 82 |
| GSM1871086 | 65 |
| GSM1871087 | 73 |
| GSM1871088 | 69 |
| GSM1871089 | 57 |
| GSM1871090 | 68 |
| GSM1871091 | 64 |
| GSM1871092 | 61 |
| GSM1871093 | 61 |
| GSM1871094 | 80 |
| GSM1871095 | 81 |
| GSM1871096 | 73 |
| GSM1871097 | 85 |
| GSM1871098 | 75 |
| GSM1871099 | 79 |
| GSM1871100 | 84 |
| GSM1871101 | 68 |
| GSM1871102 | 65 |
| GSM1871103 | 91 |
| GSM1871104 | 76 |
| GSM1871105 | 90 |
| GSM1871106 | 64 |
| GSM1871107 | 53 |
| GSM1871108 | 62 |
| GSM1871109 | 61 |
| GSM1871110 | 75 |
| GSM1871111 | 72 |
| GSM1871112 | 82 |
| GSM1871113 | 77 |
| GSM1871114 | 53 |
| GSM1871115 | 84 |
| GSM1871116 | 84 |
| GSM1871117 | 76 |
| GSM1871118 | 77 |
| GSM1871119 | 79 |
| GSM1871120 | 66 |
| GSM1871121 | 80 |
| GSM1871122 | 78 |

|            |    |
|------------|----|
| GSM1871123 | 81 |
| GSM1871124 | 66 |
| GSM1871125 | 74 |
| GSM1871126 | 80 |
| GSM1871127 | 73 |
| GSM1871128 | 63 |
| GSM1871129 | 75 |
| GSM1871130 | 75 |
| GSM1871131 | 53 |
| GSM1871132 | 84 |
| GSM1871133 | 75 |
| GSM1871134 | 68 |
| GSM1871135 | 77 |
| GSM1871136 | 63 |
| GSM1871137 | 66 |
| GSM1871138 | 61 |
| GSM1871139 | 84 |
| GSM1871140 | 77 |
| GSM1871141 | 68 |
| GSM1871142 | 73 |
| GSM1871143 | 61 |
| GSM1871144 | 73 |
| GSM1871145 | 68 |
| GSM1871146 | 81 |
| GSM1871147 | 64 |
| GSM1871148 | 67 |
| GSM1871149 | 63 |
| GSM1871150 | 77 |
| GSM1871151 | 75 |
| GSM1871152 | 52 |
| GSM1871153 | 82 |
| GSM1871154 | 86 |
| GSM1871155 | 76 |
| GSM1871156 | 77 |
| GSM1871157 | 76 |
| GSM1871158 | 53 |
| GSM1871159 | 68 |
| GSM1871160 | 80 |
| GSM1871161 | 74 |
| GSM1871162 | 78 |
| GSM1871163 | 73 |
| GSM1871164 | 75 |
| GSM1871165 | 77 |
| GSM1871166 | 69 |
| GSM1871167 | 73 |
| GSM1871168 | 76 |
| GSM1871169 | 59 |
| GSM1871170 | 79 |
| GSM1871171 | 86 |
| GSM1871172 | 64 |
| GSM1871173 | 60 |
| GSM1871174 | 85 |
| GSM1871175 | 74 |
| GSM1871176 | 54 |
| GSM1871177 | 77 |
| GSM1871178 | 79 |



|            |    |
|------------|----|
| GSM1871179 | 83 |
| GSM1871180 | 79 |
| GSM1871181 | 70 |
| GSM1871182 | 75 |
| GSM1871183 | 67 |
| GSM1871184 | 60 |
| GSM1871185 | 84 |
| GSM1871186 | 74 |
| GSM1871187 | 84 |
| GSM1871188 | 78 |
| GSM1871189 | 65 |
| GSM1871190 | 86 |
| GSM1871191 | 63 |
| GSM1871192 | 76 |
| GSM1871193 | 80 |
| GSM1871194 | 79 |
| GSM1871195 | 74 |
| GSM1871196 | 54 |
| GSM1871197 | 75 |
| GSM1871198 | 75 |
| GSM1871199 | 88 |
| GSM1871200 | 62 |
| GSM1871201 | 64 |
| GSM1871202 | 71 |
| GSM1871203 | 62 |
| GSM1871204 | 73 |
| GSM1871205 | 59 |
| GSM1871206 | 76 |
| GSM1871207 | 68 |
| GSM1871208 | 74 |
| GSM1871209 | 74 |
| GSM1871210 | 68 |
| GSM1871211 | 79 |
| GSM1871212 | 73 |
| GSM1871213 | 55 |
| GSM1871214 | 63 |
| GSM1871215 | 85 |
| GSM1871216 | 61 |
| GSM1871217 | 80 |
| GSM1871218 | 83 |
| GSM1871219 | 66 |
| GSM1871220 | 73 |
| GSM1871221 | 66 |
| GSM1871222 | 67 |
| GSM1871223 | 73 |
| GSM1871224 | 72 |
| GSM1871225 | 75 |
| GSM1871226 | 67 |
| GSM1871227 | 75 |
| GSM1871228 | 59 |
| GSM1871229 | 78 |
| GSM1871230 | 76 |
| GSM1871231 | 68 |
| GSM1871232 | 56 |
| GSM1871233 | 71 |
| GSM1871234 | 78 |

|            |    |
|------------|----|
| GSM1871235 | 74 |
| GSM1871236 | 72 |
| GSM1871237 | 73 |
| GSM1871238 | 73 |
| GSM1871239 | 63 |
| GSM1871240 | 64 |
| GSM1871241 | 62 |
| GSM1871242 | 78 |
| GSM1871243 | 71 |
| GSM1871244 | 79 |
| GSM1871245 | 70 |
| GSM1871246 | 79 |
| GSM1871247 | 69 |
| GSM1871248 | 68 |
| GSM1871249 | 71 |
| GSM1871250 | 70 |
| GSM1871251 | 76 |
| GSM1871252 | 78 |
| GSM1871253 | 72 |
| GSM1871254 | 71 |
| GSM1871255 | 80 |
| GSM1871256 | 80 |
| GSM1871257 | 77 |
| GSM1871258 | 78 |
| GSM1871259 | 76 |
| GSM1871260 | 71 |
| GSM1871261 | 72 |
| GSM1871262 | 83 |
| GSM1871263 | 77 |
| GSM1871264 | 57 |
| GSM1871265 | 65 |
| GSM1871266 | 74 |
| GSM1871267 | 62 |
| GSM1871268 | 72 |
| GSM1871269 | 81 |
| GSM1871270 | 71 |
| GSM1871271 | 85 |
| GSM1871272 | 74 |
| GSM1871273 | 61 |
| GSM1871274 | 68 |
| GSM1871275 | 71 |
| GSM1871276 | 84 |
| GSM1871277 | 75 |
| GSM1871278 | 81 |
| GSM1871279 | 83 |
| GSM1871280 | 79 |
| GSM1871281 | 68 |
| GSM1871282 | 76 |
| GSM1871283 | 59 |
| GSM1871284 | 58 |
| GSM1871369 | 14 |
| GSM1871370 | 11 |
| GSM1871371 | 7  |
| GSM1871372 | 3  |
| GSM1871373 | 2  |
| GSM1871374 | 10 |

|            |    |
|------------|----|
| GSM1871375 | 7  |
| GSM1871376 | 9  |
| GSM1871377 | 24 |
| GSM1871378 | 35 |
| GSM1871379 | 34 |
| GSM1871380 | 35 |
| GSM1871381 | 3  |
| GSM1871382 | 6  |
| GSM1871383 | 24 |
| GSM1871384 | 32 |
| GSM1871385 | 34 |
| GSM1871386 | 4  |
| GSM1871387 | 21 |
| GSM1871388 | 6  |
| GSM1871389 | 21 |
| GSM1871390 | 24 |
| GSM1871391 | 31 |
| GSM1871392 | 8  |
| GSM1871393 | 10 |
| GSM1871394 | 8  |
| GSM1871395 | 10 |
| GSM1871396 | 8  |
| GSM1871397 | 12 |
| GSM1871398 | 8  |
| GSM1871399 | 22 |
| GSM1871400 | 10 |
| GSM1871401 | 29 |
| GSM1871402 | 11 |
| GSM1871403 | 9  |
| GSM1871404 | 7  |
| GSM1871405 | 5  |
| GSM1871406 | 2  |
| GSM1871407 | 7  |
| GSM1871408 | 4  |
| GSM1871409 | 7  |
| GSM1871410 | 27 |
| GSM1871411 | 14 |
| GSM1871412 | 15 |
| GSM1871413 | 15 |
| GSM1871414 | 30 |
| GSM1886364 | 25 |
| GSM1886365 | 25 |
| GSM1886366 | 28 |
| GSM1886367 | 21 |
| GSM1886368 | 24 |
| GSM1886369 | 24 |
| GSM1886370 | 25 |
| GSM1886371 | 22 |
| GSM1886372 | 23 |
| GSM1886373 | 20 |
| GSM1886374 | 22 |
| GSM1886375 | 21 |
| GSM1886376 | 23 |
| GSM1886377 | 27 |
| GSM1886378 | 20 |
| GSM1886379 | 28 |

|            |    |
|------------|----|
| GSM1886380 | 26 |
| GSM1886381 | 24 |
| GSM1886382 | 20 |
| GSM1886383 | 23 |
| GSM1886384 | 26 |
| GSM1886385 | 19 |
| GSM1886386 | 23 |
| GSM1886387 | 22 |
| GSM1886388 | 22 |
| GSM1886389 | 20 |
| GSM1886390 | 22 |
| GSM1886391 | 34 |
| GSM1886392 | 21 |
| GSM1886393 | 19 |
| GSM1886394 | 21 |
| GSM1886395 | 23 |
| GSM1886396 | 26 |
| GSM1886397 | 22 |
| GSM1886398 | 24 |
| GSM1886399 | 21 |
| GSM1886400 | 30 |
| GSM1886401 | 25 |
| GSM1886402 | 23 |
| GSM1886403 | 28 |
| GSM1886404 | 28 |
| GSM1886405 | 26 |
| GSM1886406 | 24 |
| GSM1886407 | 20 |
| GSM1886408 | 33 |
| GSM1886409 | 25 |
| GSM1886410 | 20 |
| GSM1886411 | 23 |
| GSM1886412 | 21 |
| GSM1886413 | 22 |
| GSM1886414 | 25 |
| GSM1886415 | 25 |
| GSM1886416 | 22 |
| GSM1886417 | 24 |
| GSM1886418 | 24 |
| GSM1886419 | 25 |
| GSM1886420 | 23 |
| GSM1886421 | 24 |
| GSM1886422 | 22 |
| GSM1886423 | 28 |
| GSM1886424 | 22 |
| GSM1886425 | 25 |
| GSM1886426 | 24 |
| GSM1886427 | 19 |
| GSM1886428 | 33 |
| GSM1886429 | 19 |
| GSM1886430 | 24 |
| GSM1886431 | 25 |
| GSM1886432 | 23 |
| GSM1886433 | 22 |
| GSM1886434 | 22 |
| GSM1886435 | 28 |

|            |    |
|------------|----|
| GSM1886436 | 20 |
| GSM1886437 | 26 |
| GSM1886438 | 27 |
| GSM1886439 | 21 |
| GSM1886440 | 23 |
| GSM1886441 | 21 |
| GSM1886442 | 19 |
| GSM1886443 | 19 |
| GSM1886444 | 20 |
| GSM1886445 | 25 |
| GSM1886446 | 23 |
| GSM1886447 | 19 |
| GSM1886448 | 24 |
| GSM1886449 | 20 |
| GSM1886450 | 22 |
| GSM1886451 | 18 |
| GSM1886452 | 28 |
| GSM1886453 | 27 |
| GSM1886454 | 24 |
| GSM1886455 | 19 |
| GSM1886456 | 25 |
| GSM1886457 | 22 |
| GSM1886458 | 21 |
| GSM1886459 | 20 |
| GSM1886460 | 25 |
| GSM1886461 | 25 |
| GSM1886462 | 18 |
| GSM1886463 | 26 |
| GSM1886464 | 20 |
| GSM1886465 | 19 |
| GSM1886466 | 21 |
| GSM1886467 | 25 |
| GSM1886468 | 27 |
| GSM1886469 | 24 |
| GSM1886470 | 25 |
| GSM1886471 | 20 |
| GSM1886472 | 25 |
| GSM1886473 | 23 |
| GSM1886474 | 26 |
| GSM1886475 | 24 |
| GSM1886476 | 24 |
| GSM1886477 | 26 |
| GSM1886478 | 25 |
| GSM1886479 | 34 |
| GSM1886480 | 18 |
| GSM1886481 | 25 |
| GSM1886482 | 21 |
| GSM1886483 | 25 |
| GSM1886484 | 25 |
| GSM1886485 | 25 |
| GSM1886486 | 25 |
| GSM1886487 | 21 |
| GSM1886488 | 34 |
| GSM1886489 | 24 |
| GSM1886490 | 26 |
| GSM1886491 | 21 |

|            |    |
|------------|----|
| GSM1886492 | 19 |
| GSM1886493 | 24 |
| GSM1886494 | 23 |
| GSM1886495 | 22 |
| GSM1886496 | 21 |
| GSM1886497 | 24 |
| GSM1886498 | 23 |
| GSM1886499 | 23 |
| GSM1886500 | 27 |
| GSM1886501 | 28 |
| GSM1886502 | 26 |
| GSM1886503 | 23 |
| GSM1886504 | 25 |
| GSM1886505 | 20 |
| GSM1886506 | 26 |
| GSM1886507 | 27 |
| GSM1886508 | 19 |
| GSM1886509 | 25 |
| GSM1886510 | 20 |
| GSM1886511 | 24 |
| GSM1886512 | 25 |
| GSM1886513 | 19 |
| GSM1886514 | 30 |
| GSM1886515 | 24 |
| GSM1886516 | 22 |
| GSM1886517 | 20 |
| GSM1886518 | 31 |
| GSM1886519 | 28 |
| GSM1886520 | 24 |
| GSM1886521 | 24 |
| GSM1886522 | 32 |
| GSM1886523 | 27 |
| GSM1886524 | 26 |
| GSM1886525 | 24 |
| GSM1886526 | 19 |
| GSM1886527 | 19 |
| GSM1886528 | 24 |
| GSM1886529 | 20 |
| GSM1886530 | 20 |
| GSM1886531 | 18 |
| GSM1886532 | 20 |
| GSM1886533 | 18 |
| GSM1886534 | 19 |
| GSM1886535 | 30 |
| GSM1886536 | 25 |
| GSM1886537 | 23 |
| GSM1886538 | 22 |
| GSM1886539 | 23 |
| GSM1886540 | 23 |
| GSM1886541 | 27 |
| GSM1886542 | 22 |
| GSM1886543 | 31 |
| GSM1886544 | 21 |
| GSM1886545 | 33 |
| GSM1886546 | 25 |
| GSM1886547 | 20 |

|            |    |
|------------|----|
| GSM1886548 | 23 |
| GSM1886549 | 20 |
| GSM1886550 | 30 |
| GSM1886551 | 22 |
| GSM1886552 | 27 |
| GSM1886553 | 21 |
| GSM1886554 | 25 |
| GSM1886555 | 26 |
| GSM1886556 | 21 |
| GSM1886557 | 23 |
| GSM1886558 | 20 |
| GSM1886559 | 26 |
| GSM1886560 | 21 |
| GSM1886561 | 28 |
| GSM1886562 | 24 |
| GSM1886563 | 28 |
| GSM1886564 | 19 |
| GSM1886565 | 21 |
| GSM1886566 | 23 |
| GSM1886567 | 27 |
| GSM1886568 | 25 |
| GSM1886569 | 25 |
| GSM1886570 | 25 |
| GSM1886571 | 21 |
| GSM1886572 | 24 |
| GSM1886573 | 21 |
| GSM1886574 | 21 |
| GSM1886575 | 22 |
| GSM1886576 | 22 |
| GSM1886577 | 21 |
| GSM1886578 | 23 |
| GSM1886579 | 21 |
| GSM1886580 | 25 |
| GSM1886581 | 24 |
| GSM1886582 | 24 |
| GSM1886583 | 23 |
| GSM1886584 | 21 |
| GSM1886585 | 22 |
| GSM1886586 | 24 |
| GSM1886587 | 23 |
| GSM1886588 | 28 |
| GSM1886589 | 14 |
| GSM1886590 | 15 |
| GSM1886591 | 14 |
| GSM1886592 | 16 |
| GSM1886593 | 15 |
| GSM1886594 | 16 |
| GSM1886595 | 15 |
| GSM1886596 | 15 |
| GSM1886597 | 15 |
| GSM1886598 | 16 |
| GSM1886599 | 16 |
| GSM1886600 | 15 |
| GSM1886601 | 14 |
| GSM1886602 | 15 |
| GSM1886603 | 15 |

|            |    |
|------------|----|
| GSM1886604 | 15 |
| GSM1886605 | 15 |
| GSM1886606 | 14 |
| GSM1886607 | 15 |
| GSM1886608 | 15 |
| GSM1886619 | 16 |
| GSM1886620 | 15 |
| GSM1886621 | 15 |
| GSM1886622 | 16 |
| GSM1886623 | 15 |
| GSM1886624 | 16 |
| GSM1886625 | 15 |
| GSM1886626 | 15 |
| GSM1886627 | 15 |
| GSM1886628 | 15 |
| GSM1886629 | 14 |
| GSM1886630 | 15 |
| GSM1886631 | 15 |
| GSM1886632 | 15 |
| GSM1886633 | 15 |
| GSM1886634 | 14 |
| GSM1886635 | 15 |
| GSM1886636 | 15 |
| GSM1886637 | 15 |
| GSM1886638 | 14 |
| GSM1886639 | 14 |
| GSM1886640 | 15 |
| GSM1886641 | 15 |
| GSM1886642 | 15 |
| GSM1886643 | 15 |
| GSM1886644 | 15 |
| GSM1886645 | 15 |
| GSM1886646 | 15 |
| GSM1886647 | 15 |
| GSM1886648 | 15 |
| GSM1886649 | 16 |
| GSM1886650 | 14 |
| GSM1886651 | 15 |
| GSM1886652 | 15 |
| GSM1886653 | 15 |
| GSM1886654 | 15 |
| GSM1886655 | 15 |
| GSM1886656 | 15 |
| GSM1886657 | 15 |
| GSM1886658 | 15 |
| GSM1886659 | 15 |
| GSM1886660 | 15 |
| GSM1886661 | 14 |
| GSM1886662 | 15 |
| GSM1886663 | 14 |
| GSM1886664 | 15 |
| GSM1886665 | 15 |
| GSM1886666 | 15 |
| GSM1886667 | 15 |
| GSM1886668 | 15 |
| GSM1886669 | 14 |



|            |    |
|------------|----|
| GSM1886670 | 15 |
| GSM1886671 | 15 |
| GSM1886672 | 15 |
| GSM1886673 | 15 |
| GSM1886674 | 15 |
| GSM1886675 | 15 |
| GSM1886676 | 15 |
| GSM1886677 | 16 |
| GSM1886678 | 15 |
| GSM1886679 | 15 |
| GSM1886680 | 15 |
| GSM1886681 | 16 |
| GSM1886682 | 15 |
| GSM1886683 | 16 |
| GSM1886684 | 16 |
| GSM1886685 | 16 |
| GSM1886686 | 16 |
| GSM1886687 | 15 |
| GSM1886688 | 16 |
| GSM1886689 | 16 |
| GSM1886690 | 16 |
| GSM1886691 | 16 |
| GSM1886692 | 15 |
| GSM1886693 | 16 |
| GSM1886713 | 16 |
| GSM1886716 | 15 |
| GSM1886720 | 16 |
| GSM1886723 | 16 |
| GSM1886726 | 16 |
| GSM1886774 | 16 |
| GSM1886775 | 16 |
| GSM1886776 | 16 |
| GSM1886777 | 16 |
| GSM1886778 | 16 |
| GSM1886779 | 16 |
| GSM1886780 | 16 |
| GSM1886781 | 16 |
| GSM1886782 | 16 |
| GSM1886783 | 16 |
| GSM1886784 | 16 |
| GSM1886785 | 16 |
| GSM1886786 | 16 |
| GSM1886787 | 16 |
| GSM1886788 | 16 |
| GSM1886789 | 16 |
| GSM1886790 | 16 |
| GSM1886791 | 16 |
| GSM1886792 | 16 |
| GSM1886793 | 16 |
| GSM1886794 | 16 |
| GSM1886795 | 16 |
| GSM1886796 | 16 |
| GSM1886797 | 16 |
| GSM1886798 | 16 |
| GSM1886799 | 16 |
| GSM1886800 | 16 |

|            |    |
|------------|----|
| GSM1886801 | 16 |
| GSM1886802 | 16 |
| GSM1886803 | 16 |
| GSM2084605 | 0  |
| GSM2084606 | 0  |
| GSM2084607 | 0  |
| GSM2084608 | 0  |
| GSM2084609 | 0  |
| GSM2084610 | 0  |
| GSM2084611 | 0  |
| GSM2084612 | 0  |
| GSM2084613 | 0  |
| GSM2084614 | 0  |
| GSM2084615 | 0  |
| GSM2084616 | 0  |
| GSM2084617 | 0  |
| GSM2084618 | 0  |
| GSM2084619 | 0  |
| GSM2084620 | 0  |
| GSM2084621 | 0  |
| GSM2084622 | 0  |
| GSM2084623 | 0  |
| GSM2084624 | 0  |
| GSM2084625 | 0  |
| GSM2084626 | 0  |
| GSM2084627 | 0  |
| GSM2084628 | 0  |
| GSM2084629 | 0  |
| GSM2084630 | 0  |
| GSM2084631 | 0  |
| GSM2084632 | 0  |
| GSM2084633 | 0  |
| GSM2084634 | 0  |
| GSM2084635 | 0  |
| GSM2084636 | 0  |
| GSM2084637 | 0  |
| GSM2084638 | 0  |
| GSM2084639 | 0  |
| GSM2084640 | 0  |
| GSM2125506 | 0  |
| GSM2125507 | 0  |
| GSM2125508 | 0  |
| GSM2125509 | 0  |
| GSM2125510 | 0  |
| GSM2125511 | 0  |
| GSM2125512 | 0  |
| GSM2125513 | 0  |
| GSM2125514 | 0  |
| GSM2125515 | 0  |
| GSM2125516 | 0  |
| GSM2125517 | 0  |
| GSM2125518 | 0  |
| GSM2125519 | 0  |
| GSM2125520 | 0  |
| GSM2125521 | 0  |
| GSM2125522 | 0  |

|            |   |
|------------|---|
| GSM2125523 | 0 |
| GSM2125524 | 0 |
| GSM2125525 | 0 |
| GSM2125526 | 0 |
| GSM2125527 | 0 |
| GSM2125528 | 0 |
| GSM2125529 | 0 |
| GSM2125530 | 0 |
| GSM2125531 | 0 |
| GSM2125532 | 0 |
| GSM2125533 | 0 |
| GSM2125534 | 0 |
| GSM2125535 | 0 |
| GSM2125536 | 0 |
| GSM2125537 | 0 |
| GSM2125538 | 0 |
| GSM2125539 | 0 |
| GSM2125540 | 0 |
| GSM2125541 | 0 |
| GSM2125542 | 0 |
| GSM2125543 | 0 |
| GSM2125544 | 0 |
| GSM2125545 | 0 |
| GSM2125546 | 0 |
| GSM2125547 | 0 |
| GSM2125548 | 0 |
| GSM2125549 | 0 |
| GSM2125550 | 0 |
| GSM2125551 | 0 |
| GSM2125552 | 0 |
| GSM2125553 | 0 |
| GSM2125554 | 0 |
| GSM2125555 | 0 |
| GSM2125556 | 0 |
| GSM2125557 | 0 |
| GSM2125558 | 0 |
| GSM2125559 | 0 |
| GSM2125560 | 0 |
| GSM2125561 | 0 |
| GSM2125562 | 0 |
| GSM2125563 | 0 |
| GSM2125564 | 0 |
| GSM2125565 | 0 |
| GSM2125566 | 0 |
| GSM2125567 | 0 |
| GSM2125568 | 0 |
| GSM2125569 | 0 |
| GSM2125570 | 0 |
| GSM2125571 | 0 |
| GSM2125572 | 0 |
| GSM2125573 | 0 |
| GSM2125574 | 0 |
| GSM2125575 | 0 |
| GSM2125576 | 0 |
| GSM2125577 | 0 |
| GSM2125578 | 0 |

|            |   |
|------------|---|
| GSM2125579 | 0 |
| GSM2125580 | 0 |
| GSM2125581 | 0 |
| GSM2125582 | 0 |
| GSM2125583 | 0 |
| GSM2125584 | 0 |
| GSM2125585 | 0 |
| GSM2125586 | 0 |
| GSM2125587 | 0 |
| GSM2125588 | 0 |
| GSM2125589 | 0 |
| GSM2125590 | 0 |
| GSM2125591 | 0 |
| GSM2125592 | 0 |
| GSM2125593 | 0 |
| GSM2125594 | 0 |
| GSM2125595 | 0 |
| GSM2125596 | 0 |
| GSM2125597 | 0 |
| GSM2125598 | 0 |
| GSM2125599 | 0 |
| GSM2125600 | 0 |
| GSM2125601 | 0 |
| GSM2125602 | 0 |
| GSM2125603 | 0 |
| GSM2125604 | 0 |
| GSM2125605 | 0 |
| GSM2125606 | 0 |
| GSM2125607 | 0 |
| GSM2125608 | 0 |
| GSM2125609 | 0 |
| GSM2125610 | 0 |
| GSM2125611 | 0 |
| GSM2125612 | 0 |
| GSM2125613 | 0 |
| GSM2125614 | 0 |
| GSM2125615 | 0 |
| GSM2125616 | 0 |
| GSM2125617 | 0 |
| GSM2125618 | 0 |
| GSM2125619 | 0 |
| GSM2125620 | 0 |
| GSM2125621 | 0 |
| GSM2125622 | 0 |
| GSM2125623 | 0 |
| GSM2125624 | 0 |
| GSM2125625 | 0 |
| GSM2125626 | 0 |
| GSM2125627 | 0 |
| GSM2125628 | 0 |
| GSM2125629 | 0 |
| GSM2125630 | 0 |
| GSM2125631 | 0 |
| GSM2125632 | 0 |
| GSM2125633 | 0 |
| GSM2125634 | 0 |

|            |   |
|------------|---|
| GSM2125635 | 0 |
| GSM2125636 | 0 |
| GSM2125637 | 0 |
| GSM2125638 | 0 |
| GSM2125639 | 0 |
| GSM2125640 | 0 |
| GSM2125641 | 0 |
| GSM2125642 | 0 |
| GSM2125643 | 0 |
| GSM2125644 | 0 |
| GSM2125645 | 0 |
| GSM2125646 | 0 |
| GSM2125647 | 0 |
| GSM2125648 | 0 |
| GSM2125649 | 0 |
| GSM2125650 | 0 |
| GSM2125651 | 0 |
| GSM2125652 | 0 |
| GSM2125653 | 0 |
| GSM2125654 | 0 |
| GSM2125655 | 0 |
| GSM2125656 | 0 |
| GSM2125657 | 0 |
| GSM2125658 | 0 |
| GSM2125659 | 0 |
| GSM2125660 | 0 |
| GSM2125661 | 0 |
| GSM2125662 | 0 |
| GSM2125663 | 0 |
| GSM2125664 | 0 |
| GSM2125665 | 0 |
| GSM2125666 | 0 |
| GSM2125667 | 0 |
| GSM2125668 | 0 |
| GSM2125669 | 0 |
| GSM2125670 | 0 |
| GSM2125671 | 0 |
| GSM2125672 | 0 |
| GSM2125673 | 0 |
| GSM2125674 | 0 |
| GSM2125675 | 0 |
| GSM2125676 | 0 |
| GSM2125677 | 0 |
| GSM2125678 | 0 |
| GSM2125679 | 0 |
| GSM2125680 | 0 |
| GSM2125681 | 0 |
| GSM2125682 | 0 |
| GSM2125683 | 0 |
| GSM2125684 | 0 |
| GSM2125685 | 0 |
| GSM2125686 | 0 |
| GSM2125687 | 0 |
| GSM2125688 | 0 |
| GSM2124069 | 0 |
| GSM2124070 | 0 |

|            |    |
|------------|----|
| GSM2124071 | 0  |
| GSM2124072 | 0  |
| GSM2124073 | 0  |
| GSM2124074 | 0  |
| GSM2124075 | 0  |
| GSM2124076 | 0  |
| GSM2124077 | 0  |
| GSM2124078 | 0  |
| GSM2124079 | 0  |
| GSM2124080 | 0  |
| GSM2124081 | 0  |
| GSM2124082 | 0  |
| GSM2124083 | 0  |
| GSM2124084 | 0  |
| GSM2124085 | 0  |
| GSM2124086 | 0  |
| GSM2124087 | 0  |
| GSM2124088 | 0  |
| GSM2124089 | 0  |
| GSM2124090 | 0  |
| GSM2124091 | 0  |
| GSM2124092 | 0  |
| GSM2199619 | 5  |
| GSM2199620 | 5  |
| GSM2199621 | 5  |
| GSM2199622 | 5  |
| GSM2199623 | 5  |
| GSM2199624 | 5  |
| GSM2199625 | 5  |
| GSM2199626 | 5  |
| GSM2199627 | 5  |
| GSM2199628 | 5  |
| GSM2199629 | 5  |
| GSM2199630 | 5  |
| GSM2199631 | 5  |
| GSM2199632 | 5  |
| GSM2199633 | 5  |
| GSM2199634 | 0  |
| GSM2199635 | 0  |
| GSM2199636 | 0  |
| GSM2199637 | 0  |
| GSM2199638 | 0  |
| GSM2199639 | 0  |
| GSM2199640 | 0  |
| GSM2199641 | 0  |
| GSM2199642 | 0  |
| GSM2199643 | 0  |
| GSM2199644 | 0  |
| GSM2199645 | 0  |
| GSM2199646 | 0  |
| GSM2199647 | 0  |
| GSM2199648 | 0  |
| GSM2333901 | 72 |
| GSM2333902 | 55 |
| GSM2333903 | 23 |
| GSM2333904 | 86 |

|            |    |
|------------|----|
| GSM2333905 | 74 |
| GSM2333906 | 76 |
| GSM2333907 | 18 |
| GSM2333908 | 38 |
| GSM2333909 | 33 |
| GSM2333910 | 34 |
| GSM2333911 | 86 |
| GSM2333912 | 18 |
| GSM2333913 | 65 |
| GSM2333914 | 55 |
| GSM2333915 | 65 |
| GSM2333916 | 59 |
| GSM2333917 | 80 |
| GSM2333918 | 60 |
| GSM2333919 | 55 |
| GSM2333920 | 63 |
| GSM2333921 | 29 |
| GSM2333922 | 68 |
| GSM2333923 | 22 |
| GSM2333924 | 16 |
| GSM2333925 | 75 |
| GSM2333926 | 16 |
| GSM2333927 | 74 |
| GSM2333928 | 63 |
| GSM2333929 | 38 |
| GSM2333930 | 64 |
| GSM2333931 | 68 |
| GSM2333932 | 45 |
| GSM2333933 | 80 |
| GSM2333934 | 46 |
| GSM2333935 | 82 |
| GSM2333936 | 58 |
| GSM2333937 | 69 |
| GSM2333938 | 23 |
| GSM2333939 | 59 |
| GSM2333940 | 79 |
| GSM2333941 | 66 |
| GSM2333942 | 71 |
| GSM2333943 | 55 |
| GSM2333944 | 62 |
| GSM2333945 | 57 |
| GSM2333946 | 50 |
| GSM2333947 | 48 |
| GSM2333948 | 39 |
| GSM2333949 | 81 |
| GSM2333950 | 81 |
| GSM2333951 | 91 |
| GSM2333952 | 15 |
| GSM2333953 | 57 |
| GSM2333954 | 45 |
| GSM2333955 | 45 |
| GSM2333956 | 28 |
| GSM2333957 | 37 |
| GSM2333958 | 69 |
| GSM2333959 | 25 |
| GSM2333960 | 66 |

|            |    |
|------------|----|
| GSM2333961 | 22 |
| GSM2333962 | 23 |
| GSM2333963 | 17 |
| GSM2333964 | 17 |
| GSM2333965 | 21 |
| GSM2333966 | 82 |
| GSM2333967 | 62 |
| GSM2333968 | 68 |
| GSM2333969 | 45 |
| GSM2333970 | 42 |
| GSM2333971 | 68 |
| GSM2333972 | 40 |
| GSM2333973 | 44 |
| GSM2333974 | 22 |
| GSM2333975 | 23 |
| GSM2333976 | 25 |
| GSM2333977 | 45 |
| GSM2333978 | 40 |
| GSM2333979 | 81 |
| GSM2333980 | 32 |
| GSM2333981 | 28 |
| GSM2333982 | 19 |
| GSM2333983 | 16 |
| GSM2333984 | 18 |
| GSM2333985 | 19 |
| GSM2333986 | 18 |
| GSM2333987 | 18 |
| GSM2333988 | 18 |
| GSM2333989 | 18 |
| GSM2333990 | 17 |
| GSM2333991 | 82 |
| GSM2333992 | 35 |
| GSM2333993 | 39 |
| GSM2333994 | 49 |
| GSM2333995 | 45 |
| GSM2333996 | 42 |
| GSM2333997 | 18 |
| GSM2333998 | 32 |
| GSM2333999 | 18 |
| GSM2334000 | 40 |
| GSM2334001 | 43 |
| GSM2334002 | 44 |
| GSM2334003 | 46 |
| GSM2334004 | 79 |
| GSM2334005 | 71 |
| GSM2334006 | 70 |
| GSM2334007 | 68 |
| GSM2334008 | 41 |
| GSM2334009 | 62 |
| GSM2334010 | 47 |
| GSM2334011 | 44 |
| GSM2334012 | 51 |
| GSM2334013 | 53 |
| GSM2334014 | 79 |
| GSM2334016 | 68 |
| GSM2334017 | 50 |



|            |    |
|------------|----|
| GSM2334018 | 20 |
| GSM2334019 | 73 |
| GSM2334020 | 52 |
| GSM2334021 | 55 |
| GSM2334022 | 22 |
| GSM2334023 | 27 |
| GSM2334024 | 15 |
| GSM2334025 | 26 |
| GSM2334026 | 47 |
| GSM2334027 | 43 |
| GSM2334028 | 49 |
| GSM2334029 | 61 |
| GSM2334030 | 80 |
| GSM2334031 | 48 |
| GSM2334032 | 74 |
| GSM2334033 | 64 |
| GSM2334034 | 31 |
| GSM2334035 | 17 |
| GSM2334036 | 33 |
| GSM2334037 | 76 |
| GSM2334038 | 48 |
| GSM2334039 | 20 |
| GSM2334040 | 67 |
| GSM2334041 | 55 |
| GSM2334042 | 43 |
| GSM2334043 | 56 |
| GSM2334044 | 63 |
| GSM2334045 | 20 |
| GSM2334046 | 75 |
| GSM2334047 | 65 |
| GSM2334048 | 77 |
| GSM2334049 | 26 |
| GSM2334050 | 69 |
| GSM2334051 | 64 |
| GSM2334052 | 43 |
| GSM2334053 | 39 |
| GSM2334054 | 74 |
| GSM2334055 | 44 |
| GSM2334056 | 47 |
| GSM2334057 | 17 |
| GSM2334058 | 19 |
| GSM2334059 | 15 |
| GSM2334060 | 26 |
| GSM2334061 | 18 |
| GSM2334062 | 17 |
| GSM2334063 | 80 |
| GSM2334064 | 79 |
| GSM2334065 | 71 |
| GSM2334066 | 42 |
| GSM2334067 | 14 |
| GSM2334068 | 53 |
| GSM2334069 | 76 |
| GSM2334070 | 46 |
| GSM2334071 | 27 |
| GSM2334072 | 22 |
| GSM2334073 | 44 |

|            |    |
|------------|----|
| GSM2334074 | 40 |
| GSM2334075 | 50 |
| GSM2334076 | 67 |
| GSM2334077 | 49 |
| GSM2334078 | 67 |
| GSM2334079 | 48 |
| GSM2334080 | 39 |
| GSM2334081 | 37 |
| GSM2334082 | 30 |
| GSM2334083 | 39 |
| GSM2334084 | 72 |
| GSM2334085 | 86 |
| GSM2334086 | 59 |
| GSM2334087 | 76 |
| GSM2334088 | 73 |
| GSM2334089 | 65 |
| GSM2334090 | 83 |
| GSM2334091 | 72 |
| GSM2334092 | 66 |
| GSM2334093 | 83 |
| GSM2334094 | 22 |
| GSM2334095 | 84 |
| GSM2334096 | 56 |
| GSM2334097 | 69 |
| GSM2334098 | 31 |
| GSM2334099 | 43 |
| GSM2334100 | 60 |
| GSM2334101 | 81 |
| GSM2334102 | 29 |
| GSM2334103 | 32 |
| GSM2334104 | 29 |
| GSM2334105 | 27 |
| GSM2334106 | 35 |
| GSM2334107 | 17 |
| GSM2334108 | 53 |
| GSM2334109 | 16 |
| GSM2334110 | 34 |
| GSM2334111 | 65 |
| GSM2334112 | 36 |
| GSM2334113 | 34 |
| GSM2334114 | 77 |
| GSM2334115 | 58 |
| GSM2334116 | 41 |
| GSM2334117 | 25 |
| GSM2334118 | 40 |
| GSM2334119 | 50 |
| GSM2334120 | 18 |
| GSM2334121 | 32 |
| GSM2334122 | 69 |
| GSM2334123 | 68 |
| GSM2334124 | 48 |
| GSM2334125 | 80 |
| GSM2334126 | 35 |
| GSM2334127 | 57 |
| GSM2334128 | 59 |
| GSM2334129 | 70 |

|            |    |
|------------|----|
| GSM2334130 | 49 |
| GSM2334131 | 22 |
| GSM2334132 | 72 |
| GSM2334133 | 47 |
| GSM2334134 | 32 |
| GSM2334135 | 15 |
| GSM2334136 | 31 |
| GSM2334137 | 27 |
| GSM2334138 | 19 |
| GSM2334139 | 76 |
| GSM2334140 | 59 |
| GSM2334141 | 48 |
| GSM2334142 | 71 |
| GSM2334143 | 18 |
| GSM2334144 | 48 |
| GSM2334145 | 17 |
| GSM2334146 | 53 |
| GSM2334147 | 17 |
| GSM2334148 | 17 |
| GSM2334149 | 15 |
| GSM2334150 | 17 |
| GSM2334151 | 19 |
| GSM2334152 | 15 |
| GSM2334153 | 15 |
| GSM2334154 | 43 |
| GSM2334155 | 38 |
| GSM2334156 | 17 |
| GSM2334157 | 23 |
| GSM2334158 | 22 |
| GSM2334159 | 46 |
| GSM2334160 | 24 |
| GSM2334161 | 71 |
| GSM2334162 | 66 |
| GSM2334163 | 77 |
| GSM2334164 | 70 |
| GSM2334165 | 45 |
| GSM2334166 | 65 |
| GSM2334167 | 19 |
| GSM2334168 | 45 |
| GSM2334169 | 41 |
| GSM2334170 | 67 |
| GSM2334171 | 48 |
| GSM2334172 | 49 |
| GSM2334173 | 24 |
| GSM2334174 | 43 |
| GSM2334175 | 21 |
| GSM2334176 | 17 |
| GSM2334177 | 50 |
| GSM2334178 | 15 |
| GSM2334179 | 62 |
| GSM2334180 | 28 |
| GSM2334181 | 16 |
| GSM2334182 | 35 |
| GSM2334183 | 50 |
| GSM2334184 | 63 |
| GSM2334185 | 49 |

|            |    |
|------------|----|
| GSM2334186 | 34 |
| GSM2334187 | 47 |
| GSM2334188 | 58 |
| GSM2334189 | 71 |
| GSM2334190 | 23 |
| GSM2334191 | 21 |
| GSM2334192 | 17 |
| GSM2334193 | 71 |
| GSM2334194 | 24 |
| GSM2334195 | 29 |
| GSM2334196 | 39 |
| GSM2334197 | 16 |
| GSM2334198 | 52 |
| GSM2334199 | 27 |
| GSM2334200 | 19 |
| GSM2334201 | 33 |
| GSM2334202 | 61 |
| GSM2334203 | 47 |
| GSM2334204 | 19 |
| GSM2334205 | 51 |
| GSM2334206 | 31 |
| GSM2334207 | 21 |
| GSM2334208 | 20 |
| GSM2334209 | 19 |
| GSM2334210 | 20 |
| GSM2334211 | 44 |
| GSM2334212 | 16 |
| GSM2334214 | 61 |
| GSM2334215 | 41 |
| GSM2334216 | 19 |
| GSM2334218 | 48 |
| GSM2334220 | 40 |
| GSM2334221 | 51 |
| GSM2334222 | 15 |
| GSM2334223 | 78 |
| GSM2334224 | 72 |
| GSM2334225 | 61 |
| GSM2334226 | 33 |
| GSM2334227 | 46 |
| GSM2334228 | 81 |
| GSM2334229 | 69 |
| GSM2334230 | 71 |
| GSM2334231 | 77 |
| GSM2334232 | 54 |
| GSM2334233 | 64 |
| GSM2334234 | 25 |
| GSM2334235 | 41 |
| GSM2334236 | 37 |
| GSM2334237 | 26 |
| GSM2334238 | 61 |
| GSM2334239 | 67 |
| GSM2334240 | 37 |
| GSM2334241 | 36 |
| GSM2334242 | 49 |
| GSM2334243 | 59 |
| GSM2334244 | 50 |

|            |    |
|------------|----|
| GSM2334245 | 34 |
| GSM2334246 | 51 |
| GSM2334247 | 25 |
| GSM2334248 | 79 |
| GSM2334249 | 31 |
| GSM2334250 | 40 |
| GSM2334251 | 29 |
| GSM2334252 | 63 |
| GSM2334253 | 45 |
| GSM2334254 | 49 |
| GSM2334255 | 42 |
| GSM2334256 | 47 |
| GSM2334257 | 45 |
| GSM2334258 | 74 |
| GSM2334259 | 72 |
| GSM2334260 | 39 |
| GSM2334261 | 70 |
| GSM2334262 | 15 |
| GSM2334263 | 62 |
| GSM2334264 | 53 |
| GSM2334265 | 31 |
| GSM2334266 | 81 |
| GSM2334267 | 44 |
| GSM2334268 | 69 |
| GSM2334269 | 36 |
| GSM2334270 | 53 |
| GSM2334271 | 15 |
| GSM2334272 | 55 |
| GSM2334273 | 55 |
| GSM2334274 | 15 |
| GSM2334275 | 41 |
| GSM2334276 | 79 |
| GSM2334277 | 50 |
| GSM2334278 | 75 |
| GSM2334279 | 45 |
| GSM2334280 | 73 |
| GSM2334281 | 75 |
| GSM2334282 | 18 |
| GSM2334283 | 74 |
| GSM2334284 | 65 |
| GSM2334285 | 39 |
| GSM2334286 | 47 |
| GSM2334287 | 57 |
| GSM2334288 | 62 |
| GSM2334289 | 69 |
| GSM2334290 | 70 |
| GSM2334291 | 21 |
| GSM2334292 | 63 |
| GSM2334293 | 17 |
| GSM2334294 | 39 |
| GSM2334295 | 56 |
| GSM2334296 | 75 |
| GSM2334297 | 68 |
| GSM2334298 | 38 |
| GSM2334299 | 53 |
| GSM2334300 | 36 |

|            |    |
|------------|----|
| GSM2334301 | 70 |
| GSM2334302 | 67 |
| GSM2334303 | 63 |
| GSM2334304 | 47 |
| GSM2334305 | 44 |
| GSM2334306 | 16 |
| GSM2334307 | 80 |
| GSM2334308 | 69 |
| GSM2334309 | 22 |
| GSM2334310 | 19 |
| GSM2334311 | 76 |
| GSM2334312 | 38 |
| GSM2334313 | 54 |
| GSM2334314 | 70 |
| GSM2334315 | 44 |
| GSM2334316 | 16 |
| GSM2334317 | 40 |
| GSM2334318 | 71 |
| GSM2334319 | 67 |
| GSM2334320 | 48 |
| GSM2334321 | 19 |
| GSM2334322 | 18 |
| GSM2334323 | 83 |
| GSM2334324 | 36 |
| GSM2334325 | 16 |
| GSM2334326 | 17 |
| GSM2334327 | 28 |
| GSM2334328 | 23 |
| GSM2334329 | 33 |
| GSM2334330 | 44 |
| GSM2334331 | 40 |
| GSM2334332 | 17 |
| GSM2334333 | 68 |
| GSM2334334 | 82 |
| GSM2334335 | 69 |
| GSM2334336 | 66 |
| GSM2334337 | 42 |
| GSM2334338 | 32 |
| GSM2334339 | 34 |
| GSM2334340 | 46 |
| GSM2334341 | 57 |
| GSM2334343 | 56 |
| GSM2334344 | 51 |
| GSM2334345 | 69 |
| GSM2334346 | 51 |
| GSM2334347 | 61 |
| GSM2334348 | 53 |
| GSM2334349 | 15 |
| GSM2334350 | 36 |
| GSM2334351 | 50 |
| GSM2334352 | 67 |
| GSM2334353 | 50 |
| GSM2334354 | 16 |
| GSM2334355 | 59 |
| GSM2334356 | 21 |
| GSM2334357 | 25 |

|            |    |
|------------|----|
| GSM2334358 | 19 |
| GSM2334359 | 60 |
| GSM2334360 | 48 |
| GSM2334361 | 60 |
| GSM2334362 | 15 |
| GSM2334363 | 33 |
| GSM2334364 | 22 |
| GSM2334365 | 54 |
| GSM2334366 | 94 |
| GSM2334367 | 54 |
| GSM2334368 | 25 |
| GSM2334369 | 48 |
| GSM2334370 | 21 |
| GSM2334371 | 62 |
| GSM2334372 | 21 |
| GSM2334373 | 72 |
| GSM2334374 | 48 |
| GSM2334375 | 46 |
| GSM2334376 | 21 |
| GSM2334377 | 81 |
| GSM2334378 | 69 |
| GSM2334379 | 47 |
| GSM2334380 | 85 |
| GSM2334381 | 48 |
| GSM2334382 | 42 |
| GSM2334383 | 34 |
| GSM2334384 | 50 |
| GSM2334385 | 53 |
| GSM2334386 | 41 |
| GSM2334387 | 38 |
| GSM2334388 | 15 |
| GSM2334389 | 77 |
| GSM2334390 | 44 |
| GSM2334391 | 65 |
| GSM2334392 | 33 |
| GSM2334393 | 71 |
| GSM2334394 | 32 |
| GSM2334395 | 58 |
| GSM2334396 | 56 |
| GSM2334397 | 19 |
| GSM2334398 | 23 |
| GSM2334399 | 29 |
| GSM2334400 | 65 |
| GSM2334401 | 36 |
| GSM2334402 | 60 |
| GSM2334403 | 42 |
| GSM2334404 | 70 |
| GSM2334405 | 69 |
| GSM2334406 | 81 |
| GSM2334407 | 48 |
| GSM2334408 | 31 |
| GSM2334409 | 80 |
| GSM2334410 | 56 |
| GSM2334411 | 47 |
| GSM2334412 | 32 |
| GSM2334413 | 16 |

|            |    |
|------------|----|
| GSM2334414 | 23 |
| GSM2334415 | 52 |
| GSM2334416 | 74 |
| GSM2334417 | 51 |
| GSM2334418 | 46 |
| GSM2334419 | 35 |
| GSM2334420 | 42 |
| GSM2334421 | 20 |
| GSM2334422 | 35 |
| GSM2334423 | 33 |
| GSM2334424 | 51 |
| GSM2334425 | 49 |
| GSM2334426 | 38 |
| GSM2334427 | 27 |
| GSM2334428 | 17 |
| GSM2334429 | 23 |
| GSM2334430 | 81 |
| GSM2334431 | 29 |
| GSM2334432 | 49 |
| GSM2334433 | 40 |
| GSM2334434 | 39 |
| GSM2334435 | 57 |
| GSM2334436 | 17 |
| GSM2334437 | 39 |
| GSM2334438 | 66 |
| GSM2334439 | 56 |
| GSM2334440 | 72 |
| GSM2334441 | 46 |
| GSM2334442 | 71 |
| GSM2334443 | 53 |
| GSM2334444 | 25 |
| GSM2334445 | 16 |
| GSM2334446 | 20 |
| GSM2334447 | 21 |
| GSM2334448 | 74 |
| GSM2334449 | 56 |
| GSM2334450 | 23 |
| GSM2334451 | 36 |
| GSM2334452 | 23 |
| GSM2334453 | 75 |
| GSM2334454 | 45 |
| GSM2334455 | 80 |
| GSM2334456 | 17 |
| GSM2334457 | 71 |
| GSM2334458 | 49 |
| GSM2334459 | 42 |
| GSM2334460 | 17 |
| GSM2334461 | 73 |
| GSM2334462 | 40 |
| GSM2334463 | 22 |
| GSM2334464 | 57 |
| GSM2334465 | 19 |
| GSM2334466 | 62 |
| GSM2334467 | 32 |
| GSM2334468 | 16 |
| GSM2334469 | 40 |



|            |    |
|------------|----|
| GSM2334470 | 59 |
| GSM2334471 | 47 |
| GSM2334472 | 39 |
| GSM2334473 | 46 |
| GSM2334474 | 68 |
| GSM2334475 | 16 |
| GSM2334476 | 21 |
| GSM2334477 | 40 |
| GSM2334478 | 70 |
| GSM2334479 | 55 |
| GSM2334480 | 67 |
| GSM2334481 | 45 |
| GSM2334482 | 54 |
| GSM2334483 | 64 |
| GSM2334484 | 16 |
| GSM2334485 | 51 |
| GSM2334486 | 35 |
| GSM2334487 | 23 |
| GSM2334488 | 78 |
| GSM2334489 | 37 |
| GSM2334490 | 16 |
| GSM2334491 | 44 |
| GSM2334492 | 61 |
| GSM2334493 | 37 |
| GSM2334494 | 19 |
| GSM2334495 | 38 |
| GSM2334496 | 71 |
| GSM2334497 | 15 |
| GSM2334498 | 41 |
| GSM2334499 | 70 |
| GSM2334500 | 18 |
| GSM2334501 | 78 |
| GSM2334502 | 61 |
| GSM2334503 | 80 |
| GSM2334504 | 38 |
| GSM2334505 | 43 |
| GSM2334506 | 66 |
| GSM2334507 | 74 |
| GSM2334508 | 80 |
| GSM2334509 | 18 |
| GSM2334510 | 84 |
| GSM2334511 | 58 |
| GSM2334512 | 50 |
| GSM2334513 | 20 |
| GSM2334514 | 76 |
| GSM2334515 | 74 |
| GSM2334516 | 83 |
| GSM2334517 | 72 |
| GSM2334518 | 24 |
| GSM2334519 | 87 |
| GSM2334520 | 81 |
| GSM2334521 | 40 |
| GSM2334522 | 34 |
| GSM2334523 | 61 |
| GSM2334524 | 18 |
| GSM2334525 | 58 |

|            |    |
|------------|----|
| GSM2334526 | 23 |
| GSM2334527 | 33 |
| GSM2334528 | 30 |
| GSM2334529 | 63 |
| GSM2334530 | 88 |
| GSM2334531 | 22 |
| GSM2334532 | 15 |
| GSM2334533 | 53 |
| GSM2334534 | 45 |
| GSM2334535 | 54 |
| GSM2334536 | 63 |
| GSM2334537 | 54 |
| GSM2334538 | 70 |
| GSM2334539 | 33 |
| GSM2334540 | 79 |
| GSM2334541 | 54 |
| GSM2334542 | 57 |
| GSM2334543 | 83 |
| GSM2334544 | 73 |
| GSM2334545 | 58 |
| GSM2334546 | 80 |
| GSM2334547 | 85 |
| GSM2334548 | 45 |
| GSM2334549 | 15 |
| GSM2334550 | 43 |
| GSM2334551 | 45 |
| GSM2334552 | 45 |
| GSM2334553 | 26 |
| GSM2334554 | 48 |
| GSM2334555 | 49 |
| GSM2334556 | 22 |
| GSM2334557 | 18 |
| GSM2334558 | 33 |
| GSM2334559 | 49 |
| GSM2334560 | 31 |
| GSM2334561 | 55 |
| GSM2334562 | 75 |
| GSM2334563 | 42 |
| GSM2334564 | 49 |
| GSM2334565 | 65 |
| GSM2334566 | 53 |
| GSM2334567 | 60 |
| GSM2334568 | 70 |
| GSM2334569 | 16 |
| GSM2334570 | 71 |
| GSM2334571 | 66 |
| GSM2334572 | 20 |
| GSM2334573 | 59 |
| GSM2334574 | 91 |
| GSM2334575 | 80 |
| GSM2334576 | 18 |
| GSM2334577 | 21 |
| GSM2334578 | 16 |
| GSM2334579 | 45 |
| GSM2334580 | 44 |
| GSM2334581 | 82 |

|            |    |
|------------|----|
| GSM2334582 | 75 |
| GSM2334583 | 27 |
| GSM2334584 | 21 |
| GSM2334585 | 31 |
| GSM2334586 | 70 |
| GSM2334587 | 48 |
| GSM2334588 | 87 |
| GSM2334589 | 21 |
| GSM2334590 | 77 |
| GSM2334591 | 15 |
| GSM2334592 | 77 |
| GSM2334593 | 81 |
| GSM2334594 | 74 |
| GSM2334595 | 68 |
| GSM2334596 | 73 |
| GSM2334597 | 16 |
| GSM2334598 | 70 |
| GSM2334599 | 42 |
| GSM2334600 | 72 |
| GSM2334601 | 75 |
| GSM2334602 | 38 |
| GSM2334603 | 44 |
| GSM2334604 | 17 |
| GSM2334605 | 65 |
| GSM2334606 | 64 |
| GSM2334607 | 56 |
| GSM2334608 | 44 |
| GSM2334609 | 63 |
| GSM2334610 | 53 |
| GSM2334611 | 15 |
| GSM2334612 | 77 |
| GSM2334613 | 84 |
| GSM2334614 | 73 |
| GSM2334615 | 38 |
| GSM2334616 | 51 |
| GSM2334617 | 45 |
| GSM2334618 | 59 |
| GSM2334620 | 86 |
| GSM2334621 | 62 |
| GSM2334622 | 80 |
| GSM2334623 | 56 |
| GSM2334624 | 25 |
| GSM2334625 | 16 |
| GSM2334626 | 16 |
| GSM2334627 | 53 |
| GSM2334628 | 74 |
| GSM2334629 | 52 |
| GSM2334630 | 70 |
| GSM2334631 | 72 |
| GSM2334632 | 54 |
| GSM2334633 | 52 |
| GSM2334634 | 45 |
| GSM2334635 | 68 |
| GSM2358635 | 73 |
| GSM2358637 | 65 |
| GSM2358638 | 76 |

|            |    |
|------------|----|
| GSM2358640 | 49 |
| GSM2358644 | 63 |
| GSM2358646 | 68 |
| GSM2358647 | 43 |
| GSM2358648 | 49 |
| GSM2358652 | 60 |
| GSM2358653 | 50 |
| GSM2358656 | 57 |
| GSM2358657 | 68 |
| GSM2358659 | 72 |
| GSM2358660 | 63 |
| GSM2358663 | 79 |
| GSM2358665 | 59 |
| GSM2358666 | 53 |
| GSM2358668 | 38 |
| GSM2358673 | 45 |
| GSM2358675 | 78 |
| GSM2358678 | 56 |
| GSM2358680 | 58 |
| GSM2358681 | 71 |
| GSM2358683 | 68 |
| GSM2358685 | 52 |
| GSM2358687 | 61 |
| GSM2358689 | 60 |
| GSM2358690 | 61 |
| GSM2358692 | 62 |
| GSM2358694 | 70 |
| GSM2358697 | 59 |
| GSM2358698 | 64 |
| GSM2358699 | 42 |
| GSM2358703 | 71 |
| GSM2358705 | 63 |
| GSM2358707 | 70 |
| GSM2358709 | 59 |
| GSM2358711 | 68 |
| GSM2358712 | 73 |
| GSM2358715 | 44 |
| GSM2358716 | 57 |
| GSM2358719 | 60 |
| GSM2358721 | 65 |
| GSM2358722 | 73 |
| GSM2358723 | 59 |
| GSM2358724 | 51 |

---

**Supplementary Table S2. Comparison between Age Predictor and two popular approaches.**

|                                                                             | Age Predictor     | Horvath's (1) | Hannum's (2) |
|-----------------------------------------------------------------------------|-------------------|---------------|--------------|
| Tissue                                                                      | blood             | all           | blood        |
| Number of probes used                                                       | 52                | 353           | 71           |
| Pearson correlation coefficient between predicted age and chronological age | 0.92              | 0.88          | 0.9          |
| Root Mean Square Error (RMSE)                                               | 3.94              | 5.07          | 9.13         |
| Mean Absolute Error (MAE)                                                   | 3.03              | 4.03          | 8.17         |
| GEO sample ID<br>( <i>n</i> = 2711)                                         | Chronological age | Predicted age |              |
| GSM1343050                                                                  | 37.0              | 41.6          | 40.6         |
| GSM1343051                                                                  | 43.8              | 47.9          | 52.2         |
| GSM1343052                                                                  | 47.4              | 49.1          | 53.2         |
| GSM1343053                                                                  | 38.6              | 38.7          | 39.6         |
| GSM1343054                                                                  | 44.3              | 44.3          | 46.4         |
| GSM1343055                                                                  | 50.4              | 51.9          | 58.8         |
| GSM1343056                                                                  | 56.5              | 63.4          | 61.8         |
| GSM1343057                                                                  | 66.5              | 70.3          | 73.8         |
| GSM1343058                                                                  | 35.7              | 36.0          | 39.9         |
| GSM1343059                                                                  | 44.0              | 49.7          | 47.6         |
| GSM1343060                                                                  | 51.1              | 52.4          | 51.5         |
| GSM1343061                                                                  | 43.3              | 47.1          | 45.0         |
| GSM1343062                                                                  | 55.5              | 59.0          | 58.2         |
| GSM1343063                                                                  | 68.5              | 64.5          | 68.5         |
| GSM1343064                                                                  | 37.0              | 35.8          | 38.2         |
| GSM1343065                                                                  | 49.7              | 52.2          | 48.7         |
| GSM1343066                                                                  | 50.2              | 48.8          | 57.8         |
| GSM1343067                                                                  | 68.8              | 65.0          | 65.7         |
| GSM1343068                                                                  | 52.3              | 49.7          | 49.0         |
| GSM1343069                                                                  | 54.6              | 54.8          | 56.0         |
| GSM1343070                                                                  | 47.8              | 48.0          | 45.5         |
| GSM1343071                                                                  | 66.6              | 55.4          | 54.1         |
| GSM1343072                                                                  | 57.2              | 60.1          | 52.9         |
| GSM1343073                                                                  | 57.2              | 60.1          | 61.6         |
| GSM1343074                                                                  | 58.5              | 59.4          | 57.8         |
| GSM1343075                                                                  | 44.5              | 47.3          | 48.2         |
| GSM1343076                                                                  | 49.5              | 54.2          | 56.4         |
| GSM1343077                                                                  | 61.0              | 67.3          | 56.4         |
| GSM1343078                                                                  | 53.1              | 54.4          | 52.2         |
| GSM1343079                                                                  | 59.5              | 57.7          | 57.2         |
| GSM1343080                                                                  | 43.2              | 41.7          | 41.5         |
| GSM1343081                                                                  | 24.5              | 28.0          | 22.6         |
| GSM1343082                                                                  | 47.7              | 49.2          | 44.3         |
| GSM1343083                                                                  | 60.5              | 62.6          | 62.2         |
| GSM1343084                                                                  | 35.3              | 37.6          | 36.7         |
| GSM1343085                                                                  | 61.8              | 62.3          | 63.2         |
| GSM1343086                                                                  | 41.2              | 44.9          | 44.5         |
| GSM1343087                                                                  | 49.4              | 52.0          | 53.5         |
| GSM1343088                                                                  | 43.0              | 45.4          | 46.4         |

|            |      |      |      |      |
|------------|------|------|------|------|
| GSM1343089 | 52.6 | 59.4 | 59.8 | 65.3 |
| GSM1343090 | 43.2 | 49.8 | 50.2 | 55.0 |
| GSM1343091 | 55.4 | 58.2 | 59.5 | 58.9 |
| GSM1343092 | 46.6 | 51.1 | 51.6 | 52.0 |
| GSM1343093 | 67.9 | 65.0 | 65.5 | 73.3 |
| GSM1343094 | 41.9 | 46.7 | 45.4 | 56.7 |
| GSM1343095 | 74.5 | 68.0 | 74.0 | 78.3 |
| GSM1343096 | 60.6 | 55.8 | 55.7 | 65.7 |
| GSM1343097 | 71.6 | 65.7 | 63.5 | 73.4 |
| GSM1343098 | 69.2 | 73.9 | 69.5 | 78.5 |
| GSM1343099 | 65.7 | 66.7 | 65.8 | 73.6 |
| GSM1343100 | 54.2 | 51.8 | 59.8 | 61.8 |
| GSM1343101 | 39.6 | 41.6 | 40.2 | 48.1 |
| GSM1343102 | 60.0 | 65.2 | 61.8 | 71.8 |
| GSM1343103 | 40.6 | 37.9 | 46.2 | 52.3 |
| GSM1343104 | 44.6 | 48.7 | 47.1 | 56.6 |
| GSM1343105 | 65.3 | 67.4 | 63.9 | 68.8 |
| GSM1343106 | 35.3 | 37.4 | 38.1 | 47.7 |
| GSM1343107 | 58.6 | 56.1 | 56.5 | 62.2 |
| GSM1343108 | 66.6 | 65.8 | 69.2 | 81.0 |
| GSM1343109 | 35.2 | 36.7 | 41.2 | 48.7 |
| GSM1343110 | 73.7 | 73.7 | 70.1 | 76.0 |
| GSM1343111 | 45.5 | 43.3 | 49.2 | 54.4 |
| GSM1343112 | 54.0 | 53.7 | 50.1 | 64.8 |
| GSM1343113 | 64.3 | 66.5 | 68.5 | 74.6 |
| GSM1343114 | 43.8 | 42.9 | 41.5 | 46.5 |
| GSM1343115 | 73.1 | 80.1 | 70.9 | 89.7 |
| GSM1343116 | 44.7 | 48.3 | 51.0 | 56.1 |
| GSM1343117 | 43.5 | 37.7 | 44.1 | 43.2 |
| GSM1343118 | 67.4 | 67.5 | 61.1 | 66.7 |
| GSM1343119 | 51.3 | 56.4 | 55.9 | 59.5 |
| GSM1343120 | 61.0 | 56.7 | 60.2 | 64.6 |
| GSM1343121 | 55.1 | 49.9 | 50.3 | 55.0 |
| GSM1343122 | 35.9 | 35.6 | 40.4 | 44.9 |
| GSM1343123 | 41.7 | 44.0 | 45.2 | 53.5 |
| GSM1343124 | 42.5 | 44.5 | 48.8 | 51.1 |
| GSM1343125 | 37.5 | 40.8 | 42.1 | 51.9 |
| GSM1343126 | 54.2 | 56.4 | 56.3 | 64.6 |
| GSM1343127 | 40.6 | 33.9 | 47.2 | 49.9 |
| GSM1343128 | 50.4 | 51.4 | 50.9 | 59.2 |
| GSM1343129 | 39.6 | 35.5 | 43.3 | 39.3 |
| GSM1343130 | 55.5 | 52.0 | 56.6 | 58.0 |
| GSM1343131 | 48.8 | 46.6 | 52.5 | 57.1 |
| GSM1343132 | 69.1 | 74.2 | 69.2 | 75.9 |
| GSM1343133 | 41.0 | 37.0 | 42.8 | 45.8 |
| GSM1343134 | 51.5 | 49.2 | 56.8 | 57.0 |
| GSM1343135 | 66.1 | 64.5 | 65.5 | 75.6 |
| GSM1343136 | 35.1 | 39.2 | 33.3 | 46.2 |
| GSM1343137 | 64.0 | 64.5 | 63.6 | 69.3 |
| GSM1343138 | 51.7 | 53.3 | 56.3 | 56.9 |
| GSM1343139 | 60.3 | 63.1 | 60.9 | 65.8 |
| GSM1343140 | 58.6 | 59.0 | 62.5 | 67.4 |
| GSM1343141 | 60.5 | 66.0 | 64.1 | 71.7 |
| GSM1343142 | 58.1 | 63.9 | 64.9 | 63.9 |
| GSM1343143 | 51.3 | 59.0 | 60.0 | 62.7 |
| GSM1343144 | 51.5 | 58.0 | 56.5 | 64.5 |

|            |      |      |      |      |
|------------|------|------|------|------|
| GSM1343145 | 54.7 | 46.6 | 46.0 | 53.2 |
| GSM1343146 | 43.4 | 43.6 | 44.9 | 48.4 |
| GSM1343147 | 59.2 | 63.0 | 65.6 | 64.4 |
| GSM1343148 | 49.9 | 47.2 | 47.8 | 54.0 |
| GSM1343149 | 37.6 | 45.9 | 44.5 | 52.3 |
| GSM1343150 | 61.1 | 67.2 | 65.2 | 77.3 |
| GSM1343151 | 46.9 | 42.8 | 50.2 | 54.8 |
| GSM1343152 | 42.3 | 40.0 | 45.5 | 51.6 |
| GSM1343153 | 44.9 | 46.1 | 48.8 | 58.5 |
| GSM1343154 | 61.3 | 59.3 | 59.7 | 69.6 |
| GSM1343155 | 42.1 | 44.6 | 44.3 | 52.7 |
| GSM1343156 | 36.1 | 41.6 | 43.2 | 46.9 |
| GSM1343157 | 45.4 | 43.3 | 45.1 | 47.2 |
| GSM1343158 | 52.2 | 58.7 | 56.0 | 57.3 |
| GSM1343159 | 49.0 | 48.8 | 52.3 | 56.2 |
| GSM1343160 | 64.5 | 64.5 | 67.1 | 77.7 |
| GSM1343161 | 57.0 | 61.7 | 58.0 | 74.0 |
| GSM1343162 | 55.8 | 54.3 | 59.7 | 60.3 |
| GSM1343163 | 54.6 | 54.1 | 53.5 | 66.3 |
| GSM1343164 | 68.9 | 64.3 | 65.1 | 69.6 |
| GSM1343165 | 67.2 | 61.6 | 77.2 | 75.3 |
| GSM1343166 | 53.1 | 54.0 | 51.9 | 62.4 |
| GSM1343167 | 49.8 | 50.0 | 53.2 | 60.1 |
| GSM1343168 | 51.9 | 49.2 | 52.6 | 59.1 |
| GSM1343169 | 53.7 | 52.8 | 48.7 | 60.8 |
| GSM1343170 | 50.4 | 59.7 | 55.0 | 64.0 |
| GSM1343171 | 55.5 | 64.8 | 64.1 | 73.5 |
| GSM1343172 | 66.1 | 61.6 | 62.4 | 72.1 |
| GSM1343173 | 51.0 | 51.8 | 58.2 | 60.8 |
| GSM1343174 | 53.4 | 50.4 | 54.2 | 62.5 |
| GSM1343175 | 55.6 | 63.1 | 61.6 | 65.7 |
| GSM1343176 | 53.1 | 48.2 | 49.8 | 59.1 |
| GSM1343177 | 64.3 | 67.5 | 62.6 | 74.3 |
| GSM1343178 | 74.1 | 69.6 | 71.6 | 70.4 |
| GSM1343179 | 46.2 | 42.9 | 48.4 | 53.0 |
| GSM1343180 | 37.5 | 40.3 | 41.2 | 51.0 |
| GSM1343181 | 67.8 | 69.9 | 63.7 | 79.4 |
| GSM1343182 | 61.2 | 63.8 | 67.7 | 77.5 |
| GSM1343183 | 55.0 | 52.3 | 53.4 | 65.2 |
| GSM1343184 | 70.0 | 68.4 | 63.9 | 74.2 |
| GSM1343185 | 65.7 | 61.3 | 60.5 | 66.2 |
| GSM1343186 | 60.0 | 60.1 | 62.4 | 66.8 |
| GSM1343187 | 44.5 | 46.5 | 51.0 | 52.8 |
| GSM1343188 | 70.3 | 69.6 | 64.0 | 79.8 |
| GSM1343189 | 46.6 | 43.3 | 48.8 | 47.5 |
| GSM1343190 | 45.4 | 43.2 | 49.6 | 53.7 |
| GSM1343191 | 40.2 | 40.0 | 38.6 | 47.6 |
| GSM1343192 | 50.6 | 48.8 | 55.6 | 56.9 |
| GSM1343193 | 49.6 | 46.4 | 51.3 | 58.2 |
| GSM1343194 | 41.4 | 42.0 | 47.5 | 51.2 |
| GSM1343195 | 59.0 | 60.1 | 59.2 | 68.9 |
| GSM1343196 | 63.1 | 58.1 | 66.8 | 71.9 |
| GSM1343197 | 45.2 | 51.2 | 45.4 | 56.0 |
| GSM1343198 | 51.1 | 54.1 | 54.1 | 60.5 |
| GSM1343199 | 35.1 | 36.9 | 39.1 | 42.5 |
| GSM1343200 | 43.7 | 44.5 | 49.4 | 51.8 |

|            |      |      |      |      |
|------------|------|------|------|------|
| GSM1343201 | 42.9 | 47.0 | 51.5 | 51.6 |
| GSM1343202 | 59.7 | 60.1 | 54.7 | 65.6 |
| GSM1343203 | 45.2 | 48.1 | 41.2 | 55.6 |
| GSM1343204 | 52.9 | 50.9 | 51.7 | 59.7 |
| GSM1343205 | 55.6 | 55.4 | 58.4 | 67.9 |
| GSM1343206 | 50.6 | 49.2 | 52.8 | 68.5 |
| GSM1343207 | 50.9 | 51.9 | 50.1 | 57.4 |
| GSM1343208 | 47.4 | 47.5 | 48.9 | 55.3 |
| GSM1343209 | 53.4 | 54.2 | 60.4 | 61.0 |
| GSM1343210 | 62.8 | 66.4 | 71.5 | 75.8 |
| GSM1343211 | 38.2 | 41.3 | 43.2 | 41.8 |
| GSM1343212 | 41.1 | 41.6 | 47.6 | 51.8 |
| GSM1343213 | 56.1 | 59.1 | 61.4 | 64.5 |
| GSM1343214 | 47.7 | 48.3 | 47.8 | 53.1 |
| GSM1343215 | 48.7 | 50.8 | 55.3 | 59.3 |
| GSM1343216 | 39.9 | 38.3 | 44.1 | 51.4 |
| GSM1343217 | 43.5 | 42.3 | 43.7 | 49.2 |
| GSM1343218 | 38.5 | 40.1 | 41.0 | 44.9 |
| GSM1343219 | 43.7 | 49.7 | 51.4 | 50.7 |
| GSM1343220 | 42.1 | 48.0 | 44.8 | 61.1 |
| GSM1343221 | 43.8 | 47.4 | 50.3 | 52.7 |
| GSM1343222 | 59.8 | 58.9 | 59.9 | 64.7 |
| GSM1343223 | 45.9 | 44.2 | 51.1 | 53.8 |
| GSM1343224 | 61.0 | 58.1 | 59.1 | 59.4 |
| GSM1343225 | 42.9 | 42.7 | 47.0 | 51.2 |
| GSM1343226 | 53.9 | 54.5 | 49.6 | 60.8 |
| GSM1343227 | 45.3 | 51.8 | 51.9 | 57.1 |
| GSM1343228 | 53.4 | 53.4 | 52.8 | 56.8 |
| GSM1343229 | 42.4 | 43.5 | 47.2 | 48.2 |
| GSM1343230 | 47.9 | 48.8 | 56.4 | 60.1 |
| GSM1343231 | 55.5 | 60.5 | 59.0 | 62.3 |
| GSM1343232 | 35.6 | 39.5 | 40.4 | 49.4 |
| GSM1343233 | 37.4 | 40.1 | 40.8 | 48.7 |
| GSM1343234 | 54.3 | 48.3 | 50.3 | 56.3 |
| GSM1343235 | 46.6 | 45.4 | 42.6 | 50.1 |
| GSM1343236 | 69.4 | 66.0 | 62.8 | 73.2 |
| GSM1343237 | 41.0 | 47.8 | 41.2 | 51.3 |
| GSM1343238 | 54.8 | 53.7 | 56.7 | 60.2 |
| GSM1343239 | 47.9 | 53.7 | 54.6 | 58.9 |
| GSM1343240 | 45.8 | 49.6 | 50.1 | 61.8 |
| GSM1343241 | 66.5 | 71.4 | 68.2 | 75.7 |
| GSM1343242 | 38.1 | 40.7 | 40.5 | 45.4 |
| GSM1343243 | 70.4 | 69.1 | 65.3 | 75.1 |
| GSM1343244 | 52.6 | 54.4 | 58.7 | 55.1 |
| GSM1343245 | 54.5 | 48.4 | 44.2 | 60.5 |
| GSM1343246 | 41.1 | 43.4 | 48.2 | 50.6 |
| GSM1343247 | 50.9 | 48.8 | 50.2 | 54.0 |
| GSM1343248 | 51.3 | 48.8 | 51.3 | 56.8 |
| GSM1343249 | 52.1 | 55.7 | 57.6 | 61.5 |
| GSM1343250 | 68.3 | 79.2 | 66.3 | 79.7 |
| GSM1343251 | 53.2 | 52.8 | 55.9 | 57.3 |
| GSM1343252 | 41.6 | 44.2 | 46.6 | 53.9 |
| GSM1343253 | 49.0 | 47.6 | 49.8 | 52.0 |
| GSM1343254 | 53.4 | 51.6 | 46.1 | 53.6 |
| GSM1343255 | 36.3 | 36.2 | 35.8 | 44.1 |
| GSM1343256 | 49.7 | 54.8 | 57.7 | 63.6 |



|            |      |      |      |      |
|------------|------|------|------|------|
| GSM1343257 | 62.3 | 61.7 | 66.7 | 67.8 |
| GSM1343258 | 45.4 | 39.6 | 42.4 | 49.7 |
| GSM1343259 | 45.1 | 46.3 | 47.4 | 52.6 |
| GSM1343260 | 69.8 | 70.8 | 66.2 | 79.0 |
| GSM1343261 | 49.2 | 48.1 | 52.3 | 54.3 |
| GSM1343262 | 43.6 | 42.6 | 42.8 | 52.5 |
| GSM1343263 | 42.3 | 46.6 | 46.6 | 59.9 |
| GSM1343264 | 56.6 | 60.6 | 58.3 | 67.3 |
| GSM1343265 | 49.0 | 46.8 | 50.6 | 52.4 |
| GSM1343266 | 40.5 | 43.6 | 47.3 | 54.9 |
| GSM1343267 | 47.7 | 47.0 | 45.5 | 53.5 |
| GSM1343268 | 36.3 | 34.1 | 39.9 | 44.3 |
| GSM1343269 | 65.8 | 71.5 | 70.4 | 71.5 |
| GSM1343270 | 54.9 | 55.7 | 61.1 | 68.0 |
| GSM1343271 | 58.5 | 54.8 | 53.9 | 61.3 |
| GSM1343272 | 69.3 | 71.8 | 65.0 | 70.1 |
| GSM1343273 | 64.2 | 70.1 | 76.2 | 75.2 |
| GSM1343274 | 38.9 | 45.7 | 50.5 | 49.4 |
| GSM1343275 | 55.4 | 53.2 | 60.3 | 59.3 |
| GSM1343276 | 35.2 | 35.3 | 35.6 | 47.4 |
| GSM1343277 | 44.0 | 44.0 | 47.1 | 49.2 |
| GSM1343278 | 37.9 | 42.0 | 42.1 | 49.3 |
| GSM1343279 | 48.3 | 53.6 | 49.5 | 62.7 |
| GSM1343280 | 43.1 | 48.3 | 47.1 | 56.3 |
| GSM1343281 | 49.3 | 45.7 | 46.7 | 50.7 |
| GSM1343282 | 51.0 | 56.2 | 57.3 | 58.4 |
| GSM1343283 | 41.8 | 46.0 | 42.3 | 56.9 |
| GSM1343284 | 35.1 | 40.8 | 36.6 | 41.9 |
| GSM1343285 | 35.3 | 39.8 | 39.6 | 52.1 |
| GSM1343286 | 35.3 | 35.5 | 32.1 | 43.4 |
| GSM1343287 | 46.7 | 48.6 | 49.1 | 60.2 |
| GSM1343288 | 55.4 | 52.3 | 59.0 | 61.2 |
| GSM1343289 | 57.4 | 58.5 | 54.3 | 63.9 |
| GSM1343290 | 60.5 | 65.4 | 62.1 | 70.8 |
| GSM1343291 | 61.6 | 63.7 | 65.7 | 69.1 |
| GSM1343292 | 44.5 | 43.2 | 45.4 | 53.1 |
| GSM1343293 | 32.6 | 40.1 | 42.2 | 46.1 |
| GSM1343294 | 65.0 | 66.2 | 64.7 | 71.6 |
| GSM1343295 | 49.7 | 50.3 | 47.3 | 55.5 |
| GSM1343296 | 35.3 | 35.4 | 45.5 | 49.5 |
| GSM1343297 | 66.6 | 63.3 | 61.7 | 71.2 |
| GSM1343298 | 42.7 | 36.9 | 40.5 | 50.3 |
| GSM1343299 | 62.7 | 57.8 | 59.9 | 67.2 |
| GSM1343300 | 39.5 | 40.8 | 45.2 | 47.2 |
| GSM1343301 | 54.8 | 52.8 | 53.5 | 62.6 |
| GSM1343302 | 36.1 | 38.0 | 30.6 | 42.5 |
| GSM1343303 | 45.9 | 46.2 | 44.2 | 53.4 |
| GSM1343304 | 44.2 | 44.6 | 44.3 | 55.6 |
| GSM1343305 | 52.5 | 45.6 | 52.0 | 54.6 |
| GSM1343306 | 60.9 | 65.6 | 64.0 | 70.2 |
| GSM1343307 | 73.3 | 67.0 | 67.6 | 84.6 |
| GSM1343308 | 49.4 | 52.0 | 49.2 | 59.8 |
| GSM1343309 | 48.6 | 47.6 | 46.1 | 50.5 |
| GSM1343310 | 47.8 | 39.6 | 44.0 | 52.9 |
| GSM1343311 | 54.3 | 55.0 | 57.7 | 58.5 |
| GSM1343312 | 37.9 | 40.2 | 49.0 | 55.5 |

|            |      |      |      |      |
|------------|------|------|------|------|
| GSM1343313 | 41.6 | 37.0 | 40.6 | 48.5 |
| GSM1343314 | 47.2 | 44.3 | 49.6 | 53.1 |
| GSM1343315 | 43.2 | 39.8 | 49.9 | 52.0 |
| GSM1343316 | 46.4 | 49.2 | 52.4 | 48.2 |
| GSM1343317 | 70.4 | 62.0 | 65.6 | 71.0 |
| GSM1343318 | 38.0 | 38.3 | 43.9 | 44.4 |
| GSM1343319 | 68.7 | 67.0 | 66.5 | 75.1 |
| GSM1343320 | 64.3 | 66.1 | 74.2 | 71.1 |
| GSM1343321 | 57.6 | 52.5 | 51.4 | 54.9 |
| GSM1343322 | 52.0 | 56.2 | 55.7 | 64.1 |
| GSM1343323 | 62.1 | 71.9 | 70.3 | 79.1 |
| GSM1343324 | 42.7 | 40.8 | 45.9 | 53.9 |
| GSM1343325 | 55.9 | 50.9 | 50.5 | 56.2 |
| GSM1343326 | 35.1 | 41.5 | 41.5 | 49.7 |
| GSM1343327 | 64.3 | 64.9 | 67.4 | 66.9 |
| GSM1343328 | 42.9 | 42.5 | 47.3 | 51.1 |
| GSM1343329 | 45.1 | 52.7 | 50.5 | 59.3 |
| GSM1343330 | 53.3 | 48.6 | 55.4 | 49.8 |
| GSM1343331 | 36.1 | 37.5 | 38.6 | 45.3 |
| GSM1343332 | 59.2 | 59.3 | 55.9 | 65.4 |
| GSM1343333 | 38.3 | 41.1 | 43.4 | 50.1 |
| GSM1343334 | 36.0 | 43.5 | 42.1 | 48.5 |
| GSM1343335 | 45.5 | 46.2 | 48.2 | 56.7 |
| GSM1343336 | 42.4 | 41.7 | 44.4 | 52.4 |
| GSM1343337 | 60.6 | 65.5 | 64.7 | 71.3 |
| GSM1343338 | 63.1 | 60.7 | 65.1 | 69.5 |
| GSM1343339 | 62.9 | 59.9 | 60.9 | 66.2 |
| GSM1343340 | 47.7 | 51.9 | 51.3 | 58.3 |
| GSM1343341 | 51.7 | 53.3 | 52.1 | 54.8 |
| GSM1343342 | 40.6 | 39.8 | 44.0 | 49.2 |
| GSM1343343 | 35.2 | 38.0 | 41.4 | 43.1 |
| GSM1343344 | 70.5 | 74.0 | 75.8 | 82.0 |
| GSM1343345 | 64.1 | 60.0 | 54.7 | 66.7 |
| GSM1343346 | 51.2 | 57.5 | 58.4 | 57.0 |
| GSM1343347 | 67.0 | 53.8 | 56.6 | 65.5 |
| GSM1343348 | 50.9 | 57.0 | 62.2 | 67.2 |
| GSM1343349 | 39.9 | 40.5 | 49.4 | 55.1 |
| GSM1343350 | 44.3 | 41.8 | 40.5 | 51.5 |
| GSM1343351 | 53.4 | 51.2 | 51.8 | 59.3 |
| GSM1343352 | 57.9 | 62.8 | 61.1 | 73.3 |
| GSM1343353 | 47.0 | 55.0 | 48.8 | 58.6 |
| GSM1343354 | 40.9 | 37.0 | 48.9 | 48.2 |
| GSM1343355 | 65.8 | 54.7 | 60.5 | 67.2 |
| GSM1343356 | 55.7 | 58.9 | 52.0 | 65.1 |
| GSM1343357 | 50.6 | 45.1 | 41.9 | 47.1 |
| GSM1343358 | 65.2 | 66.9 | 66.0 | 75.0 |
| GSM1343359 | 46.0 | 55.2 | 48.8 | 57.4 |
| GSM1343360 | 57.4 | 53.3 | 51.9 | 54.2 |
| GSM1343361 | 59.4 | 59.9 | 59.9 | 70.6 |
| GSM1343362 | 49.1 | 51.5 | 49.2 | 55.4 |
| GSM1343363 | 55.4 | 61.5 | 56.2 | 75.6 |
| GSM1343364 | 49.7 | 51.5 | 49.3 | 62.1 |
| GSM1343365 | 56.6 | 57.0 | 53.8 | 66.6 |
| GSM1343366 | 56.0 | 61.3 | 56.4 | 65.3 |
| GSM1343367 | 56.5 | 56.4 | 53.8 | 64.6 |
| GSM1343368 | 37.6 | 40.5 | 39.5 | 52.1 |

|            |      |      |      |      |
|------------|------|------|------|------|
| GSM1343369 | 40.5 | 38.8 | 45.0 | 41.7 |
| GSM1343370 | 54.1 | 50.7 | 54.7 | 58.5 |
| GSM1343371 | 57.1 | 63.2 | 56.9 | 66.4 |
| GSM1343372 | 45.2 | 50.2 | 42.2 | 58.3 |
| GSM1343373 | 49.7 | 48.6 | 49.0 | 61.7 |
| GSM1343374 | 61.7 | 62.3 | 60.0 | 66.8 |
| GSM1343375 | 49.6 | 47.6 | 53.4 | 51.7 |
| GSM1343376 | 45.8 | 49.8 | 53.7 | 55.8 |
| GSM1343377 | 52.3 | 50.9 | 55.1 | 56.6 |
| GSM1343378 | 47.1 | 40.7 | 40.0 | 53.3 |
| GSM1343379 | 49.2 | 49.6 | 47.5 | 59.0 |
| GSM1343380 | 66.5 | 70.6 | 70.4 | 69.3 |
| GSM1343381 | 60.5 | 53.5 | 55.3 | 62.8 |
| GSM1343382 | 46.5 | 44.5 | 50.5 | 53.0 |
| GSM1343383 | 41.8 | 38.2 | 46.7 | 47.9 |
| GSM1343384 | 23.7 | 27.6 | 25.3 | 34.2 |
| GSM1343385 | 45.6 | 51.9 | 50.4 | 56.5 |
| GSM1343386 | 35.2 | 41.2 | 43.1 | 51.3 |
| GSM1343387 | 36.5 | 40.6 | 41.1 | 54.8 |
| GSM1343388 | 66.1 | 73.3 | 66.7 | 78.8 |
| GSM1343389 | 37.2 | 38.4 | 43.0 | 41.6 |
| GSM1343390 | 58.4 | 66.4 | 68.5 | 70.5 |
| GSM1343391 | 44.9 | 46.2 | 46.8 | 58.0 |
| GSM1343392 | 47.1 | 45.8 | 52.6 | 55.9 |
| GSM1343393 | 35.6 | 31.2 | 33.5 | 40.7 |
| GSM1343394 | 46.2 | 44.6 | 50.6 | 52.5 |
| GSM1343395 | 42.3 | 46.3 | 40.9 | 51.9 |
| GSM1343396 | 43.0 | 42.4 | 44.4 | 52.2 |
| GSM1343397 | 48.7 | 47.1 | 46.2 | 53.8 |
| GSM1343398 | 62.2 | 59.0 | 61.3 | 66.1 |
| GSM1343399 | 45.4 | 43.5 | 45.9 | 58.5 |
| GSM1343400 | 57.5 | 47.1 | 54.0 | 68.5 |
| GSM1343401 | 47.9 | 50.7 | 50.6 | 51.9 |
| GSM1343402 | 46.3 | 47.7 | 49.6 | 53.7 |
| GSM1343403 | 40.9 | 45.2 | 48.3 | 59.2 |
| GSM1343404 | 61.4 | 65.0 | 67.0 | 70.9 |
| GSM1343405 | 58.1 | 53.9 | 57.6 | 64.4 |
| GSM1343406 | 42.9 | 43.9 | 42.3 | 45.9 |
| GSM1343407 | 61.6 | 60.8 | 67.5 | 76.1 |
| GSM1343408 | 44.2 | 47.0 | 46.1 | 56.8 |
| GSM1343409 | 46.4 | 42.2 | 46.9 | 47.8 |
| GSM1343410 | 46.4 | 47.2 | 46.9 | 56.8 |
| GSM1343411 | 41.5 | 40.4 | 39.8 | 49.2 |
| GSM1343412 | 41.5 | 43.6 | 45.4 | 51.7 |
| GSM1343413 | 71.1 | 69.5 | 64.1 | 72.2 |
| GSM1343414 | 39.6 | 41.6 | 45.4 | 50.6 |
| GSM1343415 | 35.1 | 37.2 | 42.1 | 44.3 |
| GSM1343416 | 63.8 | 60.7 | 59.8 | 61.7 |
| GSM1343417 | 43.6 | 43.7 | 37.5 | 48.1 |
| GSM1343418 | 44.3 | 47.7 | 49.6 | 56.2 |
| GSM1343419 | 57.0 | 63.4 | 57.9 | 71.9 |
| GSM1343420 | 60.5 | 56.8 | 52.9 | 61.2 |
| GSM1343421 | 46.2 | 47.3 | 46.3 | 52.1 |
| GSM1343422 | 52.9 | 53.1 | 61.7 | 64.2 |
| GSM1343423 | 41.0 | 47.7 | 46.0 | 51.8 |
| GSM1343424 | 41.5 | 42.2 | 43.1 | 48.6 |

|            |      |      |      |      |
|------------|------|------|------|------|
| GSM1343425 | 44.9 | 49.4 | 54.0 | 58.9 |
| GSM1343426 | 40.3 | 41.5 | 44.4 | 52.2 |
| GSM1343427 | 44.7 | 40.2 | 43.1 | 54.5 |
| GSM1343428 | 47.9 | 48.1 | 46.9 | 50.8 |
| GSM1343429 | 44.3 | 43.9 | 47.2 | 47.6 |
| GSM1343430 | 53.0 | 57.6 | 55.8 | 67.7 |
| GSM1343431 | 56.0 | 62.9 | 61.7 | 61.5 |
| GSM1343432 | 39.2 | 43.9 | 46.6 | 53.8 |
| GSM1343433 | 56.8 | 56.4 | 56.4 | 68.6 |
| GSM1343434 | 59.2 | 54.0 | 53.2 | 66.9 |
| GSM1343435 | 42.2 | 42.0 | 42.0 | 51.4 |
| GSM1343436 | 48.3 | 45.7 | 42.9 | 54.3 |
| GSM1343437 | 59.9 | 63.3 | 63.8 | 66.2 |
| GSM1343438 | 37.5 | 38.3 | 38.4 | 46.1 |
| GSM1343439 | 31.1 | 28.2 | 32.4 | 38.0 |
| GSM1343440 | 43.1 | 42.9 | 43.5 | 46.6 |
| GSM1343441 | 51.2 | 49.6 | 52.1 | 57.0 |
| GSM1343442 | 52.9 | 49.8 | 53.2 | 63.7 |
| GSM1343443 | 60.4 | 62.2 | 56.2 | 67.3 |
| GSM1343444 | 51.4 | 54.0 | 49.6 | 62.1 |
| GSM1343445 | 68.2 | 67.2 | 66.9 | 75.0 |
| GSM1343446 | 74.3 | 73.5 | 69.0 | 80.4 |
| GSM1343447 | 55.2 | 54.3 | 56.6 | 62.8 |
| GSM1343448 | 38.2 | 41.4 | 45.1 | 49.6 |
| GSM1343449 | 41.8 | 42.5 | 45.1 | 47.7 |
| GSM1343450 | 53.3 | 57.1 | 55.2 | 61.2 |
| GSM1343451 | 35.1 | 38.5 | 39.6 | 44.5 |
| GSM1343452 | 46.0 | 50.0 | 51.5 | 58.7 |
| GSM1343453 | 47.0 | 45.1 | 49.3 | 50.6 |
| GSM1343454 | 42.1 | 40.7 | 46.6 | 46.8 |
| GSM1343455 | 65.8 | 66.8 | 61.4 | 71.0 |
| GSM1343456 | 56.2 | 57.5 | 52.8 | 65.1 |
| GSM1343457 | 66.3 | 69.4 | 70.0 | 69.9 |
| GSM1343458 | 52.2 | 52.5 | 54.8 | 57.3 |
| GSM1343459 | 54.0 | 50.1 | 53.3 | 61.2 |
| GSM1343460 | 43.5 | 44.4 | 45.5 | 52.9 |
| GSM1343461 | 48.4 | 43.9 | 48.5 | 55.9 |
| GSM1343462 | 46.0 | 50.3 | 54.0 | 57.9 |
| GSM1343463 | 46.5 | 44.8 | 50.4 | 54.7 |
| GSM1343464 | 38.4 | 47.0 | 49.1 | 57.5 |
| GSM1343465 | 49.7 | 49.5 | 51.2 | 54.7 |
| GSM1343466 | 54.1 | 59.4 | 59.6 | 66.2 |
| GSM1343467 | 50.8 | 52.5 | 56.7 | 54.9 |
| GSM1343468 | 52.3 | 54.7 | 61.2 | 69.8 |
| GSM1343469 | 43.6 | 45.7 | 47.6 | 53.8 |
| GSM1343470 | 43.2 | 45.4 | 48.1 | 47.6 |
| GSM1343471 | 59.8 | 61.7 | 65.3 | 69.0 |
| GSM1343472 | 41.3 | 43.7 | 42.0 | 48.7 |
| GSM1343473 | 53.9 | 54.8 | 55.6 | 59.8 |
| GSM1343474 | 49.6 | 54.1 | 56.7 | 65.3 |
| GSM1343475 | 64.1 | 61.8 | 61.9 | 70.5 |
| GSM1343476 | 52.2 | 55.0 | 53.3 | 59.2 |
| GSM1343477 | 55.2 | 53.2 | 55.1 | 63.3 |
| GSM1343478 | 39.7 | 40.2 | 43.4 | 50.1 |
| GSM1343479 | 52.3 | 52.2 | 58.9 | 62.5 |
| GSM1343480 | 54.8 | 53.0 | 56.5 | 67.8 |

|            |      |      |      |      |
|------------|------|------|------|------|
| GSM1343481 | 53.9 | 56.2 | 58.2 | 68.7 |
| GSM1343482 | 66.0 | 67.4 | 64.3 | 71.8 |
| GSM1343483 | 49.6 | 50.6 | 57.0 | 67.3 |
| GSM1343484 | 38.4 | 44.6 | 42.2 | 56.4 |
| GSM1343485 | 51.9 | 47.5 | 54.2 | 63.0 |
| GSM1343486 | 72.2 | 68.1 | 70.4 | 80.8 |
| GSM1343487 | 43.7 | 47.6 | 50.9 | 56.7 |
| GSM1343488 | 35.1 | 34.4 | 41.9 | 43.5 |
| GSM1343489 | 52.1 | 57.6 | 61.2 | 62.2 |
| GSM1343490 | 37.0 | 39.2 | 46.1 | 50.3 |
| GSM1343491 | 56.9 | 60.6 | 62.4 | 67.7 |
| GSM1343492 | 52.5 | 56.4 | 55.2 | 63.2 |
| GSM1343493 | 39.7 | 39.0 | 42.2 | 52.2 |
| GSM1343494 | 50.7 | 50.8 | 54.4 | 60.5 |
| GSM1343495 | 75.0 | 73.5 | 73.3 | 79.8 |
| GSM1343496 | 50.5 | 48.5 | 55.8 | 55.2 |
| GSM1343497 | 47.3 | 45.8 | 46.2 | 55.5 |
| GSM1343498 | 60.0 | 57.2 | 61.0 | 65.7 |
| GSM1343499 | 60.6 | 61.9 | 62.9 | 68.7 |
| GSM1343500 | 50.4 | 52.6 | 52.0 | 60.0 |
| GSM1343501 | 69.2 | 70.1 | 71.2 | 77.5 |
| GSM1343502 | 55.4 | 60.0 | 58.7 | 63.3 |
| GSM1343503 | 38.2 | 39.1 | 43.5 | 49.2 |
| GSM1343504 | 47.4 | 46.1 | 50.3 | 55.8 |
| GSM1343505 | 65.5 | 66.1 | 70.5 | 70.6 |
| GSM1343506 | 42.6 | 41.3 | 43.5 | 51.0 |
| GSM1343507 | 55.0 | 59.4 | 59.7 | 61.2 |
| GSM1343508 | 58.1 | 58.2 | 54.8 | 63.1 |
| GSM1343509 | 35.8 | 32.8 | 30.6 | 33.1 |
| GSM1343510 | 52.4 | 51.6 | 45.5 | 60.8 |
| GSM1343511 | 54.0 | 48.2 | 50.1 | 56.5 |
| GSM1343512 | 52.5 | 57.5 | 58.8 | 67.3 |
| GSM1343513 | 35.1 | 41.7 | 44.7 | 53.9 |
| GSM1343514 | 68.0 | 69.2 | 65.5 | 75.3 |
| GSM1343515 | 54.5 | 54.1 | 58.2 | 63.0 |
| GSM1343516 | 46.0 | 43.6 | 45.7 | 49.7 |
| GSM1343517 | 47.0 | 44.7 | 48.5 | 51.9 |
| GSM1343518 | 35.2 | 37.6 | 42.3 | 40.8 |
| GSM1343519 | 69.5 | 69.2 | 68.9 | 73.9 |
| GSM1343520 | 72.1 | 71.7 | 68.6 | 82.3 |
| GSM1343521 | 42.2 | 40.7 | 37.3 | 48.2 |
| GSM1343522 | 69.9 | 72.5 | 71.8 | 77.9 |
| GSM1343523 | 72.5 | 75.6 | 69.5 | 78.9 |
| GSM1343524 | 63.0 | 63.7 | 61.8 | 69.5 |
| GSM1343525 | 63.8 | 58.6 | 59.9 | 70.9 |
| GSM1343526 | 39.0 | 41.4 | 38.3 | 48.9 |
| GSM1343527 | 54.6 | 52.5 | 54.5 | 62.9 |
| GSM1343528 | 56.1 | 63.8 | 66.5 | 63.0 |
| GSM1343529 | 53.0 | 57.0 | 53.2 | 64.4 |
| GSM1343530 | 73.1 | 73.3 | 73.7 | 80.6 |
| GSM1343531 | 50.6 | 53.5 | 54.0 | 58.5 |
| GSM1343532 | 69.9 | 70.1 | 70.4 | 80.5 |
| GSM1343533 | 65.1 | 61.6 | 53.3 | 72.1 |
| GSM1343534 | 50.8 | 45.2 | 52.1 | 50.1 |
| GSM1343535 | 49.1 | 42.2 | 47.4 | 45.5 |
| GSM1343536 | 63.7 | 65.3 | 65.8 | 72.8 |

|            |      |      |      |      |
|------------|------|------|------|------|
| GSM1343537 | 35.9 | 30.1 | 33.3 | 43.1 |
| GSM1343538 | 66.2 | 60.1 | 67.2 | 71.9 |
| GSM1343539 | 45.5 | 43.8 | 50.8 | 45.6 |
| GSM1343540 | 48.6 | 52.3 | 48.4 | 61.7 |
| GSM1343541 | 50.6 | 52.5 | 49.4 | 62.0 |
| GSM1343542 | 71.3 | 63.6 | 62.6 | 72.2 |
| GSM1343543 | 56.0 | 53.0 | 57.6 | 58.2 |
| GSM1343544 | 64.6 | 70.9 | 65.9 | 79.1 |
| GSM1343545 | 47.4 | 44.0 | 53.5 | 55.7 |
| GSM1343546 | 67.8 | 65.0 | 61.8 | 74.2 |
| GSM1343547 | 36.2 | 36.0 | 47.5 | 50.3 |
| GSM1343548 | 41.7 | 45.4 | 53.3 | 53.3 |
| GSM1343549 | 59.8 | 55.6 | 52.3 | 66.9 |
| GSM1343550 | 59.5 | 69.9 | 54.9 | 77.8 |
| GSM1343551 | 48.5 | 42.8 | 50.3 | 53.4 |
| GSM1343552 | 43.8 | 45.7 | 45.7 | 51.6 |
| GSM1343553 | 62.2 | 59.2 | 62.1 | 68.7 |
| GSM1343554 | 51.0 | 59.5 | 63.5 | 62.6 |
| GSM1343555 | 46.1 | 42.4 | 47.0 | 51.1 |
| GSM1343556 | 53.0 | 51.6 | 55.4 | 56.3 |
| GSM1343557 | 46.5 | 47.7 | 43.2 | 52.7 |
| GSM1343558 | 66.9 | 66.5 | 68.2 | 71.5 |
| GSM1343559 | 70.3 | 64.4 | 69.2 | 70.7 |
| GSM1343560 | 71.3 | 63.7 | 62.4 | 67.1 |
| GSM1343561 | 66.6 | 64.7 | 62.0 | 72.0 |
| GSM1343562 | 55.5 | 58.4 | 55.5 | 63.8 |
| GSM1343563 | 67.5 | 72.4 | 71.9 | 80.6 |
| GSM1343564 | 60.1 | 52.7 | 52.3 | 59.3 |
| GSM1343565 | 66.4 | 70.5 | 72.6 | 72.0 |
| GSM1343566 | 45.6 | 47.6 | 51.9 | 54.8 |
| GSM1343567 | 46.0 | 46.8 | 52.4 | 50.5 |
| GSM1343568 | 42.5 | 40.7 | 41.5 | 47.9 |
| GSM1343569 | 63.3 | 64.5 | 62.2 | 72.2 |
| GSM1343570 | 62.4 | 65.1 | 64.3 | 70.9 |
| GSM1343571 | 56.4 | 52.2 | 49.0 | 57.9 |
| GSM1343572 | 38.6 | 45.5 | 46.0 | 52.5 |
| GSM1343573 | 36.8 | 32.6 | 38.7 | 40.8 |
| GSM1343574 | 71.9 | 63.9 | 66.5 | 76.6 |
| GSM1343575 | 55.3 | 61.4 | 63.8 | 73.9 |
| GSM1343576 | 58.9 | 58.3 | 62.7 | 64.1 |
| GSM1343577 | 35.7 | 41.1 | 39.3 | 42.2 |
| GSM1343578 | 58.4 | 63.0 | 61.5 | 70.1 |
| GSM1343579 | 65.6 | 65.4 | 62.2 | 73.6 |
| GSM1343580 | 43.7 | 45.4 | 42.6 | 52.8 |
| GSM1343581 | 40.6 | 43.2 | 49.6 | 54.6 |
| GSM1343582 | 36.1 | 32.7 | 37.1 | 44.5 |
| GSM1343583 | 48.1 | 45.0 | 50.3 | 56.7 |
| GSM1343584 | 35.1 | 38.7 | 42.3 | 45.8 |
| GSM1343585 | 58.3 | 57.3 | 59.4 | 59.5 |
| GSM1343586 | 53.8 | 51.2 | 53.9 | 52.1 |
| GSM1343587 | 38.1 | 36.8 | 40.2 | 47.1 |
| GSM1343588 | 37.2 | 32.6 | 35.4 | 43.2 |
| GSM1343589 | 51.6 | 49.0 | 50.0 | 62.7 |
| GSM1343590 | 49.4 | 44.7 | 36.8 | 55.1 |
| GSM1343591 | 71.6 | 66.4 | 73.2 | 69.8 |
| GSM1343592 | 45.2 | 42.2 | 49.2 | 52.0 |

|            |      |      |      |      |
|------------|------|------|------|------|
| GSM1343593 | 43.0 | 45.0 | 45.0 | 55.4 |
| GSM1343594 | 44.2 | 51.0 | 47.6 | 58.2 |
| GSM1343595 | 53.1 | 49.7 | 51.0 | 52.9 |
| GSM1343596 | 46.5 | 48.2 | 48.6 | 62.4 |
| GSM1343597 | 39.5 | 39.2 | 45.5 | 52.4 |
| GSM1343598 | 45.5 | 45.3 | 43.8 | 54.5 |
| GSM1343599 | 55.6 | 67.5 | 61.6 | 68.4 |
| GSM1343600 | 50.3 | 47.7 | 44.1 | 52.0 |
| GSM1343601 | 70.5 | 73.5 | 76.5 | 80.2 |
| GSM1343602 | 50.4 | 58.8 | 54.8 | 62.5 |
| GSM1343603 | 63.6 | 67.0 | 71.0 | 76.0 |
| GSM1343604 | 35.3 | 32.6 | 40.9 | 43.4 |
| GSM1343605 | 39.0 | 37.8 | 42.7 | 48.7 |
| GSM1343606 | 48.0 | 49.5 | 50.8 | 54.5 |
| GSM1343607 | 73.5 | 70.0 | 66.1 | 78.1 |
| GSM1343608 | 58.0 | 60.2 | 58.3 | 65.2 |
| GSM1343609 | 51.4 | 46.1 | 48.5 | 55.0 |
| GSM1343610 | 46.8 | 45.6 | 48.9 | 56.8 |
| GSM1343611 | 46.5 | 47.6 | 54.3 | 56.6 |
| GSM1343612 | 53.3 | 59.3 | 59.5 | 64.0 |
| GSM1343613 | 37.5 | 43.1 | 46.9 | 48.8 |
| GSM1343614 | 50.9 | 55.0 | 53.6 | 58.9 |
| GSM1343615 | 49.1 | 49.0 | 55.0 | 59.5 |
| GSM1343616 | 35.1 | 36.7 | 45.5 | 43.5 |
| GSM1343617 | 71.7 | 71.6 | 67.6 | 71.9 |
| GSM1343618 | 69.2 | 71.4 | 66.5 | 71.6 |
| GSM1343619 | 51.0 | 47.0 | 52.5 | 51.6 |
| GSM1343620 | 43.2 | 43.7 | 49.1 | 51.3 |
| GSM1343621 | 66.5 | 66.0 | 68.9 | 73.6 |
| GSM1343622 | 44.8 | 48.2 | 48.4 | 57.7 |
| GSM1343623 | 35.2 | 39.2 | 42.8 | 45.7 |
| GSM1343624 | 41.2 | 42.0 | 48.1 | 47.4 |
| GSM1343625 | 48.4 | 47.7 | 46.5 | 51.9 |
| GSM1343626 | 38.2 | 36.6 | 30.0 | 36.4 |
| GSM1343627 | 60.3 | 58.1 | 66.6 | 67.5 |
| GSM1343628 | 55.3 | 60.9 | 63.4 | 63.9 |
| GSM1343629 | 45.1 | 50.4 | 52.3 | 58.9 |
| GSM1343630 | 51.8 | 51.0 | 47.2 | 56.8 |
| GSM1343631 | 35.2 | 40.9 | 42.5 | 44.4 |
| GSM1343632 | 54.1 | 54.9 | 53.5 | 59.6 |
| GSM1343633 | 43.0 | 42.1 | 48.7 | 51.6 |
| GSM1343634 | 49.6 | 52.4 | 55.5 | 60.3 |
| GSM1343635 | 44.4 | 43.5 | 44.2 | 49.2 |
| GSM1343636 | 37.1 | 41.2 | 39.1 | 46.1 |
| GSM1343637 | 44.4 | 44.5 | 48.5 | 55.8 |
| GSM1343638 | 38.7 | 40.3 | 40.6 | 44.4 |
| GSM1343639 | 65.0 | 62.1 | 58.9 | 65.1 |
| GSM1343640 | 62.6 | 61.4 | 67.7 | 71.4 |
| GSM1343641 | 45.3 | 49.5 | 44.9 | 53.4 |
| GSM1343642 | 37.5 | 39.9 | 45.6 | 49.1 |
| GSM1343643 | 48.3 | 53.8 | 48.0 | 50.9 |
| GSM1343644 | 35.7 | 37.6 | 38.9 | 43.8 |
| GSM1343645 | 57.2 | 57.9 | 59.6 | 65.5 |
| GSM1343646 | 46.2 | 46.8 | 51.6 | 54.0 |
| GSM1343647 | 43.7 | 41.4 | 47.4 | 51.7 |
| GSM1343648 | 40.0 | 43.5 | 42.6 | 48.6 |

|            |      |      |      |      |
|------------|------|------|------|------|
| GSM1343649 | 55.0 | 53.5 | 53.7 | 65.3 |
| GSM1343650 | 37.4 | 40.9 | 34.8 | 44.7 |
| GSM1343651 | 48.6 | 45.9 | 47.5 | 53.1 |
| GSM1343652 | 52.1 | 49.4 | 50.0 | 59.8 |
| GSM1343653 | 41.8 | 41.5 | 44.7 | 52.7 |
| GSM1343654 | 38.2 | 40.4 | 42.3 | 44.4 |
| GSM1343655 | 57.4 | 52.7 | 54.6 | 59.6 |
| GSM1343656 | 49.4 | 48.3 | 43.2 | 50.8 |
| GSM1343657 | 51.6 | 50.5 | 53.2 | 58.6 |
| GSM1343658 | 48.8 | 50.7 | 56.8 | 59.3 |
| GSM1343659 | 35.9 | 38.9 | 42.8 | 51.1 |
| GSM1343660 | 36.2 | 37.4 | 38.0 | 46.6 |
| GSM1343661 | 56.6 | 62.0 | 65.5 | 64.5 |
| GSM1343662 | 41.3 | 49.6 | 48.3 | 52.6 |
| GSM1343663 | 57.6 | 56.8 | 54.2 | 63.6 |
| GSM1343664 | 49.8 | 47.8 | 45.4 | 54.7 |
| GSM1343665 | 70.4 | 65.1 | 59.8 | 69.9 |
| GSM1343666 | 50.0 | 50.3 | 51.7 | 58.0 |
| GSM1343667 | 55.8 | 59.9 | 58.7 | 58.8 |
| GSM1343668 | 40.8 | 46.9 | 41.3 | 54.0 |
| GSM1343669 | 45.5 | 52.7 | 48.7 | 59.1 |
| GSM1343670 | 54.5 | 59.0 | 55.7 | 61.3 |
| GSM1343671 | 48.8 | 45.3 | 51.3 | 55.7 |
| GSM1343672 | 66.4 | 69.3 | 62.0 | 76.2 |
| GSM1343673 | 44.5 | 50.9 | 48.5 | 50.9 |
| GSM1343674 | 68.4 | 66.1 | 67.2 | 72.1 |
| GSM1343675 | 49.6 | 58.4 | 60.4 | 70.1 |
| GSM1343676 | 40.9 | 36.0 | 39.9 | 42.4 |
| GSM1343677 | 60.0 | 57.0 | 58.3 | 67.9 |
| GSM1343678 | 41.1 | 42.3 | 48.9 | 47.9 |
| GSM1343679 | 67.5 | 60.0 | 60.8 | 68.5 |
| GSM1343680 | 66.8 | 62.2 | 61.7 | 70.6 |
| GSM1343681 | 50.2 | 49.3 | 48.7 | 58.2 |
| GSM1343682 | 56.5 | 56.3 | 55.0 | 55.8 |
| GSM1343683 | 49.0 | 41.2 | 50.2 | 50.4 |
| GSM1343684 | 48.0 | 50.2 | 47.9 | 55.8 |
| GSM1343685 | 42.4 | 44.3 | 46.3 | 54.3 |
| GSM1343686 | 64.2 | 61.2 | 60.5 | 65.6 |
| GSM1343687 | 55.1 | 50.4 | 48.5 | 54.9 |
| GSM1343688 | 62.0 | 62.5 | 58.1 | 72.3 |
| GSM1343689 | 44.1 | 43.6 | 48.2 | 52.7 |
| GSM1343690 | 65.9 | 60.0 | 74.6 | 78.8 |
| GSM1343691 | 60.6 | 65.0 | 64.5 | 70.3 |
| GSM1343692 | 65.2 | 64.5 | 66.7 | 73.4 |
| GSM1343693 | 50.1 | 54.6 | 53.5 | 59.7 |
| GSM1343694 | 68.6 | 66.8 | 66.2 | 75.2 |
| GSM1343695 | 67.8 | 69.2 | 59.4 | 79.0 |
| GSM1343696 | 44.3 | 44.7 | 46.9 | 55.0 |
| GSM1343697 | 38.5 | 40.9 | 44.0 | 50.5 |
| GSM1343698 | 61.9 | 63.7 | 63.8 | 69.3 |
| GSM1343699 | 52.5 | 50.6 | 54.3 | 52.3 |
| GSM1343700 | 63.6 | 59.9 | 62.1 | 72.3 |
| GSM1343701 | 37.5 | 41.5 | 42.8 | 47.5 |
| GSM1343702 | 46.9 | 44.8 | 50.8 | 55.5 |
| GSM1343703 | 55.1 | 60.3 | 58.1 | 63.5 |
| GSM1343704 | 62.1 | 67.2 | 70.7 | 71.9 |



|            |      |      |      |      |
|------------|------|------|------|------|
| GSM1343705 | 54.7 | 50.9 | 54.6 | 60.0 |
| GSM1343706 | 36.1 | 35.1 | 41.5 | 44.2 |
| GSM1343707 | 35.1 | 37.9 | 40.2 | 46.9 |
| GSM1343708 | 65.5 | 58.7 | 58.7 | 63.1 |
| GSM1343709 | 54.4 | 51.0 | 56.0 | 61.2 |
| GSM1343710 | 56.9 | 54.0 | 57.0 | 63.0 |
| GSM1343711 | 45.8 | 49.0 | 55.2 | 58.0 |
| GSM1343712 | 73.5 | 67.3 | 74.8 | 74.7 |
| GSM1343713 | 48.8 | 51.1 | 58.7 | 59.3 |
| GSM1343714 | 65.3 | 55.1 | 72.5 | 68.6 |
| GSM1343715 | 54.4 | 56.2 | 54.3 | 65.8 |
| GSM1343716 | 68.7 | 69.5 | 71.9 | 72.7 |
| GSM1343717 | 40.5 | 37.3 | 44.3 | 41.8 |
| GSM1343718 | 52.0 | 46.3 | 50.9 | 55.6 |
| GSM1343719 | 44.3 | 47.6 | 53.6 | 62.4 |
| GSM1343720 | 47.8 | 49.0 | 50.7 | 54.2 |
| GSM1343721 | 52.2 | 61.2 | 54.3 | 63.7 |
| GSM1343722 | 54.3 | 55.8 | 53.5 | 67.9 |
| GSM1343723 | 49.3 | 46.5 | 51.3 | 61.2 |
| GSM1343724 | 60.5 | 55.2 | 53.7 | 68.9 |
| GSM1343725 | 37.6 | 35.5 | 41.0 | 51.6 |
| GSM1343726 | 64.0 | 49.8 | 56.6 | 61.2 |
| GSM1343727 | 51.9 | 56.1 | 59.9 | 63.2 |
| GSM1343728 | 57.2 | 58.0 | 59.4 | 70.7 |
| GSM1343729 | 35.8 | 37.6 | 35.8 | 46.6 |
| GSM1343730 | 55.6 | 52.0 | 52.4 | 62.1 |
| GSM1343731 | 40.4 | 42.8 | 43.7 | 48.8 |
| GSM1343732 | 70.2 | 64.3 | 66.5 | 72.4 |
| GSM1343733 | 62.2 | 61.1 | 57.4 | 60.9 |
| GSM1343734 | 58.4 | 57.9 | 54.9 | 56.3 |
| GSM1343735 | 51.7 | 50.8 | 54.9 | 56.4 |
| GSM1343736 | 47.0 | 48.9 | 51.7 | 54.1 |
| GSM1343737 | 55.1 | 51.5 | 49.2 | 54.1 |
| GSM1343738 | 35.6 | 37.9 | 44.5 | 47.2 |
| GSM1343739 | 36.1 | 36.9 | 42.9 | 47.0 |
| GSM1343740 | 45.0 | 54.5 | 52.4 | 56.1 |
| GSM1343741 | 47.9 | 43.3 | 47.6 | 52.6 |
| GSM1343742 | 53.9 | 61.7 | 63.0 | 66.2 |
| GSM1343743 | 36.3 | 35.9 | 42.8 | 46.7 |
| GSM1343744 | 35.2 | 35.5 | 37.7 | 41.4 |
| GSM1343745 | 50.9 | 49.5 | 53.7 | 56.4 |
| GSM1343746 | 50.6 | 48.4 | 49.8 | 56.7 |
| GSM1343747 | 48.1 | 47.1 | 47.9 | 53.5 |
| GSM1343748 | 54.6 | 56.3 | 54.6 | 58.1 |
| GSM1343749 | 38.7 | 46.2 | 45.3 | 53.6 |
| GSM1343750 | 50.5 | 51.4 | 51.8 | 58.5 |
| GSM1343751 | 42.5 | 43.8 | 44.1 | 50.5 |
| GSM1343752 | 50.9 | 52.3 | 52.5 | 55.0 |
| GSM1343753 | 55.4 | 52.2 | 49.4 | 56.4 |
| GSM1343754 | 51.0 | 51.2 | 46.1 | 58.1 |
| GSM1343755 | 40.2 | 36.0 | 41.1 | 43.0 |
| GSM1343756 | 41.2 | 42.3 | 49.3 | 52.8 |
| GSM1343757 | 59.8 | 66.4 | 70.6 | 74.5 |
| GSM1343758 | 45.8 | 48.6 | 52.4 | 61.3 |
| GSM1343759 | 66.1 | 59.3 | 61.9 | 63.3 |
| GSM1343760 | 60.2 | 61.3 | 57.9 | 68.1 |

|            |      |      |      |      |
|------------|------|------|------|------|
| GSM1343761 | 71.3 | 69.3 | 62.9 | 76.6 |
| GSM1343762 | 52.2 | 54.9 | 59.4 | 60.2 |
| GSM1343763 | 35.7 | 38.5 | 43.6 | 48.4 |
| GSM1343764 | 53.2 | 51.7 | 54.8 | 61.1 |
| GSM1343765 | 62.5 | 56.3 | 53.9 | 66.1 |
| GSM1343766 | 61.2 | 58.2 | 52.2 | 61.7 |
| GSM1343767 | 57.7 | 55.1 | 57.2 | 60.5 |
| GSM1343768 | 35.2 | 36.8 | 39.6 | 46.8 |
| GSM1343769 | 51.5 | 52.5 | 50.7 | 57.6 |
| GSM1343770 | 59.2 | 56.8 | 60.9 | 70.3 |
| GSM1343771 | 53.6 | 50.1 | 52.9 | 56.1 |
| GSM1343772 | 54.2 | 54.8 | 56.0 | 60.2 |
| GSM1343773 | 60.5 | 57.5 | 54.0 | 65.8 |
| GSM1343774 | 51.6 | 49.9 | 48.8 | 52.8 |
| GSM1343775 | 61.7 | 65.8 | 63.3 | 72.9 |
| GSM1343776 | 45.9 | 42.9 | 47.1 | 54.5 |
| GSM1343777 | 46.9 | 48.5 | 52.5 | 63.1 |
| GSM1343778 | 52.7 | 57.4 | 54.7 | 65.5 |
| GSM1343779 | 55.9 | 54.9 | 53.5 | 61.7 |
| GSM1343780 | 50.3 | 55.6 | 55.1 | 61.3 |
| GSM1343781 | 61.3 | 61.3 | 62.0 | 67.8 |
| GSM1343782 | 47.4 | 50.9 | 45.6 | 52.6 |
| GSM1343783 | 44.1 | 46.0 | 45.5 | 54.4 |
| GSM1343784 | 47.9 | 51.4 | 54.1 | 58.3 |
| GSM1343785 | 50.7 | 48.2 | 44.8 | 58.6 |
| GSM1343786 | 73.1 | 70.2 | 63.0 | 76.8 |
| GSM1343787 | 61.3 | 63.1 | 58.7 | 69.3 |
| GSM1343788 | 37.8 | 39.3 | 49.4 | 43.2 |
| GSM1343789 | 37.2 | 39.0 | 43.6 | 46.0 |
| GSM1343790 | 54.7 | 63.0 | 67.7 | 67.7 |
| GSM1343791 | 66.3 | 58.5 | 59.0 | 59.8 |
| GSM1343792 | 45.2 | 53.6 | 49.7 | 62.6 |
| GSM1343793 | 49.3 | 50.8 | 49.4 | 55.8 |
| GSM1343794 | 54.3 | 61.6 | 61.6 | 57.2 |
| GSM1343795 | 68.9 | 68.2 | 62.4 | 69.0 |
| GSM1343796 | 50.1 | 49.7 | 57.4 | 57.7 |
| GSM1343797 | 43.9 | 42.8 | 42.1 | 53.4 |
| GSM1343798 | 45.3 | 42.8 | 41.4 | 54.5 |
| GSM1343799 | 49.3 | 46.8 | 46.2 | 54.9 |
| GSM1343800 | 37.6 | 34.0 | 36.3 | 46.1 |
| GSM1343801 | 51.0 | 55.5 | 56.1 | 65.2 |
| GSM1343802 | 35.7 | 33.1 | 44.0 | 46.6 |
| GSM1343803 | 50.0 | 48.4 | 44.8 | 56.3 |
| GSM1343804 | 70.1 | 67.0 | 71.0 | 81.5 |
| GSM1343805 | 48.0 | 45.5 | 50.0 | 50.6 |
| GSM1343806 | 42.6 | 48.0 | 49.0 | 55.2 |
| GSM1343807 | 49.9 | 53.5 | 51.8 | 60.4 |
| GSM1343808 | 49.8 | 44.5 | 45.9 | 52.7 |
| GSM1343809 | 53.0 | 60.6 | 63.6 | 62.3 |
| GSM1343810 | 67.8 | 56.5 | 64.2 | 78.2 |
| GSM1343811 | 43.6 | 42.8 | 47.9 | 52.2 |
| GSM1343812 | 42.3 | 41.6 | 42.9 | 50.9 |
| GSM1343813 | 53.2 | 51.4 | 60.2 | 59.6 |
| GSM1343814 | 42.2 | 43.8 | 49.3 | 50.9 |
| GSM1343815 | 37.5 | 39.7 | 42.0 | 48.5 |
| GSM1343816 | 59.4 | 63.8 | 64.4 | 67.3 |

|            |      |      |      |      |
|------------|------|------|------|------|
| GSM1343817 | 43.2 | 62.6 | 65.3 | 65.8 |
| GSM1343818 | 40.4 | 40.1 | 44.0 | 45.7 |
| GSM1343819 | 43.0 | 42.1 | 41.7 | 46.1 |
| GSM1343820 | 52.7 | 52.8 | 50.2 | 61.0 |
| GSM1343821 | 60.9 | 55.8 | 57.0 | 61.9 |
| GSM1343822 | 35.3 | 41.4 | 39.9 | 49.2 |
| GSM1343823 | 57.6 | 57.8 | 57.4 | 59.3 |
| GSM1343824 | 49.6 | 50.4 | 51.2 | 61.3 |
| GSM1343825 | 55.5 | 48.6 | 61.3 | 61.8 |
| GSM1343826 | 46.6 | 49.0 | 47.2 | 54.5 |
| GSM1343827 | 47.4 | 51.4 | 53.2 | 57.6 |
| GSM1343828 | 47.7 | 45.1 | 45.1 | 53.8 |
| GSM1343829 | 37.8 | 35.8 | 37.8 | 47.4 |
| GSM1343830 | 54.8 | 56.5 | 59.1 | 63.9 |
| GSM1343831 | 46.6 | 43.0 | 48.3 | 48.7 |
| GSM1343832 | 35.6 | 35.6 | 36.9 | 44.6 |
| GSM1343833 | 42.3 | 44.3 | 45.1 | 51.1 |
| GSM1343834 | 57.6 | 56.3 | 58.1 | 67.1 |
| GSM1343835 | 44.3 | 43.8 | 40.7 | 50.8 |
| GSM1343836 | 46.6 | 46.1 | 52.8 | 57.1 |
| GSM1343837 | 56.5 | 54.0 | 57.0 | 62.2 |
| GSM1343838 | 37.1 | 39.3 | 43.1 | 44.7 |
| GSM1343839 | 62.5 | 60.9 | 58.2 | 62.2 |
| GSM1343840 | 44.5 | 43.5 | 47.2 | 53.1 |
| GSM1343841 | 46.7 | 50.2 | 52.2 | 54.6 |
| GSM1343842 | 65.1 | 47.3 | 53.5 | 51.6 |
| GSM1343843 | 36.1 | 33.8 | 37.5 | 44.8 |
| GSM1343844 | 51.5 | 52.9 | 56.0 | 60.3 |
| GSM1343845 | 44.8 | 46.5 | 50.4 | 45.3 |
| GSM1343846 | 54.8 | 53.8 | 49.1 | 61.3 |
| GSM1343847 | 47.0 | 45.5 | 53.7 | 55.6 |
| GSM1343848 | 51.5 | 49.9 | 48.8 | 61.3 |
| GSM1343849 | 50.6 | 48.3 | 48.8 | 55.4 |
| GSM1343850 | 53.4 | 54.6 | 63.1 | 63.1 |
| GSM1343851 | 35.1 | 32.9 | 36.1 | 45.1 |
| GSM1343852 | 52.9 | 55.8 | 53.2 | 60.4 |
| GSM1343853 | 35.9 | 37.3 | 39.8 | 46.4 |
| GSM1343854 | 61.4 | 59.7 | 61.9 | 71.3 |
| GSM1343855 | 65.1 | 67.5 | 63.0 | 71.1 |
| GSM1343856 | 49.4 | 48.9 | 54.0 | 60.2 |
| GSM1343857 | 43.5 | 48.2 | 49.7 | 58.0 |
| GSM1343858 | 45.8 | 45.8 | 50.3 | 57.8 |
| GSM1343859 | 41.7 | 40.2 | 41.5 | 46.1 |
| GSM1343860 | 60.0 | 57.8 | 56.3 | 65.9 |
| GSM1343861 | 45.4 | 44.7 | 55.6 | 55.9 |
| GSM1343862 | 47.9 | 45.7 | 46.8 | 51.5 |
| GSM1343863 | 55.8 | 58.4 | 58.0 | 68.7 |
| GSM1343864 | 36.1 | 41.2 | 42.6 | 46.9 |
| GSM1343865 | 37.6 | 34.5 | 35.6 | 42.1 |
| GSM1343866 | 68.8 | 61.2 | 70.0 | 75.0 |
| GSM1343867 | 68.4 | 73.0 | 72.0 | 80.0 |
| GSM1343868 | 41.5 | 42.1 | 43.7 | 48.7 |
| GSM1343869 | 37.4 | 40.8 | 40.6 | 46.7 |
| GSM1343870 | 51.8 | 53.2 | 60.8 | 60.9 |
| GSM1343871 | 57.6 | 64.2 | 67.1 | 70.2 |
| GSM1343872 | 57.3 | 62.4 | 64.0 | 68.1 |

|            |      |      |      |      |
|------------|------|------|------|------|
| GSM1343873 | 38.5 | 43.6 | 44.6 | 50.1 |
| GSM1343874 | 43.6 | 45.7 | 47.4 | 58.1 |
| GSM1343875 | 40.5 | 48.5 | 46.0 | 54.9 |
| GSM1343876 | 45.0 | 44.5 | 47.4 | 49.0 |
| GSM1343877 | 66.4 | 68.8 | 68.4 | 82.6 |
| GSM1343878 | 48.5 | 53.9 | 54.2 | 57.1 |
| GSM1343879 | 62.4 | 60.0 | 61.4 | 63.9 |
| GSM1343880 | 50.8 | 56.2 | 52.8 | 61.8 |
| GSM1343881 | 68.6 | 69.2 | 65.0 | 71.2 |
| GSM1343882 | 47.5 | 47.2 | 54.3 | 57.6 |
| GSM1343883 | 48.7 | 47.7 | 46.4 | 59.7 |
| GSM1343884 | 55.3 | 55.6 | 50.0 | 64.3 |
| GSM1343885 | 66.1 | 63.0 | 62.8 | 72.3 |
| GSM1343886 | 49.8 | 49.7 | 48.5 | 54.8 |
| GSM1343887 | 36.2 | 49.6 | 53.2 | 50.8 |
| GSM1343888 | 60.4 | 58.0 | 63.9 | 68.6 |
| GSM1343889 | 54.4 | 54.6 | 54.1 | 61.7 |
| GSM1343890 | 57.6 | 67.5 | 67.9 | 72.3 |
| GSM1343891 | 65.2 | 64.3 | 59.2 | 70.5 |
| GSM1343892 | 55.6 | 55.5 | 56.0 | 66.0 |
| GSM1343893 | 41.7 | 43.8 | 44.3 | 52.2 |
| GSM1343894 | 52.3 | 54.1 | 54.9 | 64.6 |
| GSM1343895 | 53.0 | 51.2 | 55.3 | 60.1 |
| GSM1343896 | 56.8 | 58.8 | 57.2 | 67.7 |
| GSM1343897 | 66.4 | 64.8 | 59.7 | 70.4 |
| GSM1343898 | 42.4 | 43.1 | 50.4 | 53.1 |
| GSM1343899 | 53.6 | 54.1 | 58.7 | 65.2 |
| GSM1343900 | 55.5 | 56.9 | 54.2 | 63.8 |
| GSM1343901 | 49.2 | 50.5 | 56.4 | 56.7 |
| GSM1343902 | 56.4 | 55.0 | 58.0 | 62.0 |
| GSM1343903 | 50.9 | 57.3 | 59.1 | 66.0 |
| GSM1343904 | 51.5 | 55.6 | 57.7 | 60.3 |
| GSM1343905 | 48.3 | 46.6 | 52.3 | 52.2 |
| GSM1343906 | 53.8 | 52.8 | 55.6 | 57.7 |
| GSM1343907 | 54.1 | 52.3 | 54.1 | 61.2 |
| GSM1343908 | 67.8 | 56.9 | 58.3 | 63.7 |
| GSM1343909 | 47.6 | 55.6 | 54.7 | 60.4 |
| GSM1343910 | 73.6 | 69.1 | 84.8 | 78.9 |
| GSM1343911 | 48.7 | 49.1 | 51.8 | 54.3 |
| GSM1343912 | 56.7 | 54.0 | 51.8 | 64.3 |
| GSM1343913 | 57.2 | 58.6 | 56.9 | 65.9 |
| GSM1343914 | 56.4 | 51.7 | 49.9 | 62.8 |
| GSM1343915 | 37.6 | 45.4 | 47.4 | 55.7 |
| GSM1343916 | 47.6 | 49.6 | 53.7 | 59.7 |
| GSM1343917 | 39.6 | 43.1 | 43.7 | 54.8 |
| GSM1343918 | 35.4 | 39.2 | 37.0 | 42.9 |
| GSM1343919 | 67.4 | 65.6 | 73.7 | 75.7 |
| GSM1343920 | 67.1 | 66.2 | 60.3 | 69.6 |
| GSM1343921 | 69.4 | 65.6 | 73.9 | 77.9 |
| GSM1343922 | 47.1 | 47.2 | 47.8 | 52.0 |
| GSM1343923 | 55.1 | 58.3 | 55.4 | 58.7 |
| GSM1343924 | 35.2 | 34.4 | 38.0 | 43.6 |
| GSM1343925 | 54.9 | 52.7 | 54.9 | 59.8 |
| GSM1343926 | 35.5 | 35.8 | 39.9 | 47.0 |
| GSM1343927 | 59.6 | 58.3 | 60.7 | 69.9 |
| GSM1343928 | 51.3 | 52.9 | 52.1 | 59.1 |

|            |      |      |      |      |
|------------|------|------|------|------|
| GSM1343929 | 55.2 | 61.0 | 59.2 | 66.4 |
| GSM1343930 | 48.5 | 56.5 | 50.8 | 57.8 |
| GSM1343931 | 68.4 | 67.0 | 69.1 | 70.8 |
| GSM1343932 | 67.5 | 65.9 | 66.6 | 71.7 |
| GSM1343933 | 67.8 | 68.4 | 66.7 | 79.2 |
| GSM1343934 | 54.6 | 55.7 | 50.7 | 66.1 |
| GSM1343935 | 62.5 | 61.7 | 61.9 | 73.2 |
| GSM1343936 | 59.0 | 62.6 | 63.1 | 73.6 |
| GSM1343937 | 59.7 | 64.9 | 61.5 | 68.7 |
| GSM1343938 | 65.2 | 63.2 | 62.7 | 70.3 |
| GSM1343939 | 67.1 | 60.9 | 61.9 | 67.2 |
| GSM1343940 | 35.2 | 36.2 | 42.2 | 42.1 |
| GSM1343941 | 49.8 | 48.9 | 52.7 | 58.4 |
| GSM1343942 | 54.9 | 54.3 | 56.0 | 66.2 |
| GSM1343943 | 38.9 | 38.6 | 43.3 | 47.4 |
| GSM1343944 | 46.8 | 44.7 | 48.5 | 56.3 |
| GSM1343945 | 45.1 | 45.4 | 46.7 | 53.8 |
| GSM1343946 | 42.0 | 40.8 | 51.0 | 54.0 |
| GSM1343947 | 38.7 | 45.1 | 41.3 | 51.1 |
| GSM1343948 | 59.9 | 64.2 | 63.9 | 69.3 |
| GSM1343949 | 48.8 | 49.0 | 51.3 | 55.4 |
| GSM1343950 | 46.8 | 52.9 | 47.1 | 61.8 |
| GSM1343951 | 37.5 | 44.9 | 46.5 | 51.3 |
| GSM1343952 | 44.1 | 45.7 | 50.7 | 55.0 |
| GSM1343953 | 57.2 | 51.7 | 57.2 | 58.6 |
| GSM1343954 | 36.5 | 35.9 | 46.4 | 40.5 |
| GSM1343955 | 54.0 | 50.9 | 51.4 | 61.2 |
| GSM1343956 | 35.1 | 39.4 | 41.9 | 50.0 |
| GSM1343957 | 55.9 | 56.9 | 56.8 | 63.0 |
| GSM1343958 | 58.3 | 71.9 | 63.6 | 73.9 |
| GSM1343959 | 36.2 | 37.3 | 40.9 | 46.7 |
| GSM1343960 | 35.1 | 37.8 | 39.0 | 47.2 |
| GSM1343961 | 42.2 | 43.1 | 42.5 | 53.1 |
| GSM1343962 | 73.2 | 75.5 | 71.7 | 75.0 |
| GSM1343963 | 53.5 | 56.2 | 56.3 | 61.1 |
| GSM1343964 | 35.6 | 35.1 | 39.4 | 48.9 |
| GSM1343965 | 67.3 | 66.5 | 65.7 | 74.1 |
| GSM1343966 | 50.5 | 50.4 | 55.2 | 61.9 |
| GSM1343967 | 65.6 | 60.9 | 58.5 | 67.1 |
| GSM1343968 | 41.7 | 38.3 | 40.4 | 50.3 |
| GSM1343969 | 37.4 | 35.6 | 40.4 | 42.3 |
| GSM1343970 | 46.4 | 49.9 | 54.3 | 55.3 |
| GSM1343971 | 71.0 | 64.2 | 61.6 | 71.9 |
| GSM1343972 | 45.6 | 47.5 | 48.4 | 50.6 |
| GSM1343973 | 60.6 | 60.1 | 57.3 | 67.6 |
| GSM1343974 | 71.0 | 71.7 | 62.8 | 73.5 |
| GSM1343975 | 46.8 | 49.6 | 46.2 | 59.8 |
| GSM1343976 | 41.4 | 41.4 | 49.1 | 50.6 |
| GSM1343977 | 35.4 | 34.7 | 40.4 | 49.7 |
| GSM1343978 | 51.2 | 52.9 | 54.4 | 62.9 |
| GSM1343979 | 47.2 | 42.4 | 49.4 | 51.4 |
| GSM1343980 | 64.0 | 60.2 | 63.5 | 71.5 |
| GSM1343981 | 51.7 | 49.2 | 49.1 | 59.0 |
| GSM1343982 | 52.8 | 47.8 | 54.1 | 60.3 |
| GSM1343983 | 42.0 | 48.3 | 45.1 | 52.9 |
| GSM1343984 | 47.4 | 51.2 | 46.6 | 55.7 |

|            |      |      |      |      |
|------------|------|------|------|------|
| GSM1343985 | 57.3 | 60.8 | 60.6 | 69.7 |
| GSM1343986 | 41.5 | 47.7 | 47.3 | 52.4 |
| GSM1343987 | 48.5 | 52.8 | 53.0 | 58.5 |
| GSM1343988 | 54.9 | 55.0 | 56.0 | 60.4 |
| GSM1343989 | 48.6 | 45.2 | 51.0 | 56.1 |
| GSM1343990 | 46.8 | 56.4 | 56.1 | 62.3 |
| GSM1343991 | 64.3 | 61.9 | 59.0 | 66.0 |
| GSM1343992 | 58.2 | 59.5 | 64.1 | 70.0 |
| GSM1343993 | 67.4 | 62.3 | 61.5 | 69.8 |
| GSM1343994 | 41.4 | 39.5 | 39.5 | 47.5 |
| GSM1343995 | 43.5 | 42.4 | 38.7 | 51.5 |
| GSM1343996 | 40.7 | 43.8 | 41.4 | 53.3 |
| GSM1343997 | 47.0 | 45.2 | 52.0 | 54.3 |
| GSM1343998 | 53.0 | 53.5 | 55.0 | 66.5 |
| GSM1343999 | 65.9 | 62.7 | 63.7 | 71.3 |
| GSM1344000 | 65.0 | 55.7 | 58.3 | 61.1 |
| GSM1344001 | 63.1 | 60.9 | 64.8 | 68.3 |
| GSM1344002 | 58.3 | 58.9 | 63.7 | 69.2 |
| GSM1344003 | 50.2 | 46.4 | 46.6 | 56.2 |
| GSM1344004 | 49.2 | 44.3 | 48.9 | 54.7 |
| GSM1344005 | 45.5 | 44.9 | 49.9 | 54.5 |
| GSM1344006 | 47.0 | 46.7 | 47.1 | 53.9 |
| GSM1344007 | 52.3 | 47.3 | 50.0 | 54.4 |
| GSM1344008 | 46.7 | 46.9 | 47.6 | 54.5 |
| GSM1344009 | 58.3 | 56.7 | 60.6 | 65.2 |
| GSM1344010 | 62.2 | 53.0 | 61.6 | 60.0 |
| GSM1344011 | 51.8 | 57.5 | 58.5 | 61.8 |
| GSM1344012 | 58.5 | 57.6 | 62.0 | 65.6 |
| GSM1344013 | 59.1 | 52.9 | 56.5 | 61.0 |
| GSM1344014 | 64.2 | 62.1 | 68.0 | 73.3 |
| GSM1344015 | 70.4 | 65.2 | 70.4 | 75.8 |
| GSM1344016 | 66.0 | 63.1 | 62.1 | 69.3 |
| GSM1344017 | 44.2 | 47.3 | 49.7 | 55.4 |
| GSM1344018 | 50.1 | 52.9 | 58.8 | 63.8 |
| GSM1344019 | 53.4 | 55.3 | 59.9 | 65.9 |
| GSM1344020 | 39.2 | 39.8 | 40.1 | 52.3 |
| GSM1344021 | 52.5 | 52.3 | 58.8 | 64.1 |
| GSM1344022 | 48.2 | 52.0 | 58.7 | 63.5 |
| GSM1344023 | 63.0 | 64.9 | 69.4 | 71.6 |
| GSM1344024 | 41.7 | 43.6 | 44.4 | 56.0 |
| GSM1344025 | 44.2 | 41.1 | 45.5 | 50.0 |
| GSM1344026 | 55.1 | 59.3 | 59.7 | 64.5 |
| GSM1344027 | 54.2 | 55.9 | 56.0 | 64.7 |
| GSM1344028 | 55.4 | 52.0 | 54.3 | 59.8 |
| GSM1344029 | 71.2 | 68.7 | 59.5 | 71.3 |
| GSM1344030 | 56.3 | 55.4 | 57.6 | 65.0 |
| GSM1344031 | 35.3 | 37.5 | 43.7 | 50.9 |
| GSM1344032 | 37.0 | 35.9 | 43.3 | 46.0 |
| GSM1344033 | 46.2 | 47.3 | 49.9 | 56.4 |
| GSM1344034 | 60.8 | 58.6 | 58.2 | 68.1 |
| GSM1344035 | 67.5 | 62.7 | 62.4 | 72.5 |
| GSM1344036 | 68.1 | 70.9 | 64.5 | 71.6 |
| GSM1344037 | 38.1 | 40.4 | 36.6 | 51.9 |
| GSM1344038 | 44.0 | 50.5 | 43.0 | 54.4 |
| GSM1344039 | 39.6 | 36.7 | 37.8 | 39.1 |
| GSM1344040 | 54.5 | 55.0 | 57.1 | 62.3 |

|            |      |      |      |      |
|------------|------|------|------|------|
| GSM1344041 | 58.3 | 55.5 | 64.3 | 67.6 |
| GSM1344042 | 37.0 | 40.8 | 45.3 | 49.2 |
| GSM1344043 | 55.9 | 50.8 | 52.4 | 63.6 |
| GSM1344044 | 38.9 | 39.8 | 45.1 | 50.5 |
| GSM1344045 | 56.9 | 61.5 | 59.4 | 65.8 |
| GSM1344046 | 49.9 | 44.1 | 47.9 | 57.1 |
| GSM1344047 | 44.3 | 52.8 | 52.9 | 60.2 |
| GSM1344048 | 50.3 | 43.7 | 46.2 | 54.6 |
| GSM1344049 | 41.4 | 38.6 | 42.7 | 46.2 |
| GSM1344050 | 68.7 | 63.9 | 70.4 | 74.8 |
| GSM1344051 | 50.4 | 54.8 | 55.8 | 62.6 |
| GSM1344052 | 51.2 | 50.8 | 53.5 | 62.3 |
| GSM1344053 | 50.4 | 55.8 | 54.6 | 62.0 |
| GSM1344054 | 74.8 | 67.9 | 76.1 | 78.5 |
| GSM1344055 | 44.1 | 48.7 | 44.8 | 55.6 |
| GSM1344056 | 50.2 | 55.5 | 55.3 | 63.3 |
| GSM1344057 | 67.4 | 68.7 | 66.5 | 76.2 |
| GSM1344058 | 71.1 | 64.9 | 69.8 | 75.0 |
| GSM1344059 | 73.6 | 62.9 | 64.6 | 74.8 |
| GSM1344060 | 41.7 | 41.9 | 50.6 | 50.5 |
| GSM1344061 | 49.6 | 55.2 | 54.3 | 60.3 |
| GSM1344062 | 69.2 | 62.3 | 61.6 | 68.3 |
| GSM1344063 | 66.4 | 59.4 | 58.5 | 68.8 |
| GSM1344064 | 54.9 | 53.0 | 50.0 | 61.4 |
| GSM1344065 | 61.8 | 60.4 | 51.0 | 63.1 |
| GSM1344066 | 60.6 | 67.2 | 63.4 | 71.3 |
| GSM1344067 | 44.5 | 49.8 | 48.8 | 54.8 |
| GSM1344068 | 51.9 | 60.6 | 51.7 | 68.2 |
| GSM1344069 | 44.2 | 48.3 | 44.5 | 55.8 |
| GSM1344070 | 61.5 | 56.5 | 62.0 | 67.2 |
| GSM1344071 | 50.5 | 53.2 | 55.3 | 58.9 |
| GSM1344072 | 37.1 | 34.7 | 32.6 | 39.1 |
| GSM1344073 | 57.2 | 53.2 | 53.8 | 61.0 |
| GSM1344074 | 43.3 | 47.5 | 48.7 | 58.7 |
| GSM1344075 | 63.3 | 58.1 | 62.0 | 73.8 |
| GSM1344076 | 46.9 | 51.3 | 53.1 | 58.5 |
| GSM1344077 | 39.8 | 39.7 | 42.4 | 50.7 |
| GSM1344078 | 45.8 | 46.6 | 52.6 | 59.0 |
| GSM1344079 | 52.2 | 53.7 | 56.7 | 59.7 |
| GSM1344080 | 59.8 | 63.1 | 62.1 | 69.6 |
| GSM1344081 | 49.9 | 48.5 | 50.0 | 57.4 |
| GSM1344082 | 67.3 | 67.6 | 62.4 | 68.7 |
| GSM1344083 | 66.8 | 63.6 | 63.8 | 75.3 |
| GSM1344084 | 54.6 | 64.7 | 63.7 | 65.0 |
| GSM1344085 | 47.8 | 49.4 | 58.1 | 63.7 |
| GSM1344086 | 57.1 | 64.3 | 60.6 | 72.6 |
| GSM1344087 | 42.6 | 44.1 | 47.1 | 49.0 |
| GSM1344088 | 62.6 | 58.4 | 61.3 | 64.7 |
| GSM1344089 | 45.1 | 48.2 | 49.1 | 54.9 |
| GSM1344090 | 71.2 | 72.8 | 73.9 | 77.9 |
| GSM1344091 | 65.8 | 64.1 | 60.4 | 71.1 |
| GSM1344092 | 43.1 | 41.4 | 42.5 | 50.3 |
| GSM1344093 | 42.1 | 43.9 | 47.6 | 51.1 |
| GSM1344094 | 47.3 | 50.3 | 49.3 | 59.8 |
| GSM1344095 | 35.3 | 43.8 | 45.9 | 49.7 |
| GSM1344096 | 53.8 | 57.3 | 56.5 | 61.5 |

|            |      |      |      |      |
|------------|------|------|------|------|
| GSM1344097 | 56.4 | 59.0 | 56.2 | 65.4 |
| GSM1344098 | 67.9 | 67.4 | 65.6 | 72.8 |
| GSM1344099 | 61.3 | 63.5 | 70.0 | 75.0 |
| GSM1344100 | 41.0 | 35.7 | 39.2 | 46.3 |
| GSM1344101 | 52.4 | 46.5 | 42.3 | 51.6 |
| GSM1344102 | 45.3 | 45.7 | 42.8 | 52.9 |
| GSM1344103 | 71.1 | 62.3 | 75.0 | 64.2 |
| GSM1344104 | 44.7 | 46.9 | 45.4 | 53.8 |
| GSM1344105 | 56.8 | 53.6 | 55.1 | 61.0 |
| GSM1344106 | 56.5 | 58.9 | 54.6 | 60.7 |
| GSM1344107 | 49.3 | 49.1 | 56.7 | 60.4 |
| GSM1344108 | 50.2 | 48.8 | 49.9 | 55.0 |
| GSM1344109 | 68.0 | 69.3 | 62.4 | 75.2 |
| GSM1344110 | 69.9 | 68.1 | 69.3 | 76.8 |
| GSM1344111 | 51.1 | 53.6 | 52.9 | 64.9 |
| GSM1344112 | 39.3 | 42.2 | 45.2 | 50.9 |
| GSM1344113 | 57.1 | 59.8 | 53.6 | 66.4 |
| GSM1344114 | 55.2 | 49.8 | 47.1 | 63.7 |
| GSM1344115 | 42.2 | 44.3 | 50.9 | 55.0 |
| GSM1344116 | 71.3 | 76.3 | 68.9 | 82.1 |
| GSM1344117 | 49.9 | 53.2 | 57.4 | 67.5 |
| GSM1344118 | 54.0 | 48.1 | 54.7 | 60.8 |
| GSM1344119 | 46.2 | 45.5 | 51.1 | 55.1 |
| GSM1344120 | 49.3 | 55.5 | 55.7 | 61.7 |
| GSM1344121 | 40.4 | 37.9 | 45.9 | 48.8 |
| GSM1344122 | 46.6 | 49.2 | 49.8 | 61.4 |
| GSM1344123 | 52.4 | 52.9 | 58.5 | 66.4 |
| GSM1344124 | 63.6 | 60.5 | 56.4 | 73.0 |
| GSM1344125 | 40.8 | 44.7 | 48.5 | 56.4 |
| GSM1344126 | 53.3 | 47.8 | 50.9 | 60.0 |
| GSM1344127 | 42.7 | 44.8 | 53.9 | 54.3 |
| GSM1344128 | 49.5 | 55.3 | 55.2 | 63.7 |
| GSM1344129 | 36.5 | 29.3 | 32.8 | 36.6 |
| GSM1344130 | 51.1 | 41.6 | 45.5 | 51.2 |
| GSM1344131 | 49.3 | 49.1 | 48.6 | 61.9 |
| GSM1344132 | 35.4 | 35.2 | 39.9 | 39.4 |
| GSM1344133 | 48.7 | 47.1 | 49.3 | 56.5 |
| GSM1344134 | 42.0 | 40.6 | 41.4 | 47.9 |
| GSM1344135 | 42.5 | 46.4 | 53.6 | 50.9 |
| GSM1344136 | 37.1 | 41.2 | 43.3 | 50.2 |
| GSM1344137 | 57.9 | 57.1 | 59.4 | 59.4 |
| GSM1344138 | 73.9 | 72.9 | 69.3 | 73.5 |
| GSM1344139 | 56.6 | 53.5 | 51.9 | 66.1 |
| GSM1344140 | 57.7 | 60.4 | 56.3 | 65.5 |
| GSM1344141 | 53.2 | 46.8 | 47.6 | 54.7 |
| GSM1344142 | 39.9 | 40.7 | 48.4 | 48.0 |
| GSM1344143 | 43.9 | 43.5 | 49.7 | 51.8 |
| GSM1344144 | 51.3 | 55.4 | 57.0 | 61.6 |
| GSM1344145 | 45.5 | 46.2 | 49.5 | 51.8 |
| GSM1344146 | 55.2 | 59.9 | 49.4 | 63.9 |
| GSM1344147 | 42.7 | 44.9 | 47.7 | 55.0 |
| GSM1344148 | 37.5 | 39.9 | 43.4 | 46.1 |
| GSM1344149 | 46.4 | 45.6 | 53.7 | 56.8 |
| GSM1344150 | 62.2 | 58.9 | 57.2 | 66.2 |
| GSM1344151 | 48.6 | 47.2 | 48.7 | 57.3 |
| GSM1344152 | 45.4 | 49.2 | 50.3 | 53.6 |



|            |      |      |      |      |
|------------|------|------|------|------|
| GSM1344153 | 53.5 | 47.0 | 50.7 | 58.2 |
| GSM1344154 | 37.8 | 37.9 | 45.6 | 46.9 |
| GSM1344155 | 54.6 | 57.3 | 53.3 | 66.0 |
| GSM1344156 | 40.3 | 40.0 | 47.5 | 46.2 |
| GSM1344157 | 39.3 | 38.0 | 43.5 | 49.5 |
| GSM1344158 | 36.4 | 34.7 | 40.1 | 44.1 |
| GSM1344159 | 35.2 | 37.5 | 34.9 | 44.7 |
| GSM1344160 | 59.1 | 64.1 | 65.9 | 70.8 |
| GSM1344161 | 41.7 | 44.0 | 45.5 | 51.7 |
| GSM1344162 | 39.1 | 39.6 | 48.2 | 47.3 |
| GSM1344163 | 72.6 | 75.1 | 78.6 | 80.7 |
| GSM1344164 | 42.9 | 44.8 | 46.6 | 51.7 |
| GSM1344165 | 43.3 | 44.0 | 46.9 | 48.9 |
| GSM1344166 | 59.0 | 74.7 | 66.0 | 71.8 |
| GSM1344167 | 48.6 | 47.5 | 55.0 | 57.8 |
| GSM1344168 | 38.1 | 35.7 | 40.0 | 42.3 |
| GSM1344169 | 55.2 | 49.2 | 55.1 | 61.9 |
| GSM1344170 | 74.1 | 67.2 | 70.0 | 80.4 |
| GSM1344171 | 51.8 | 48.7 | 47.6 | 54.6 |
| GSM1344172 | 45.2 | 41.9 | 45.1 | 52.8 |
| GSM1344173 | 60.8 | 61.9 | 61.4 | 66.2 |
| GSM1344174 | 71.0 | 63.1 | 72.4 | 73.0 |
| GSM1344175 | 64.6 | 59.3 | 59.2 | 68.9 |
| GSM1344176 | 65.7 | 63.2 | 68.6 | 69.4 |
| GSM1344177 | 45.4 | 41.6 | 51.3 | 52.7 |
| GSM1344178 | 35.2 | 36.4 | 41.7 | 45.7 |
| GSM1344179 | 50.7 | 50.5 | 52.0 | 60.3 |
| GSM1344180 | 62.4 | 57.5 | 60.4 | 62.2 |
| GSM1344181 | 51.4 | 55.3 | 51.1 | 63.7 |
| GSM1344182 | 46.1 | 48.1 | 47.4 | 54.1 |
| GSM1344183 | 37.4 | 38.0 | 40.5 | 46.7 |
| GSM1344184 | 40.2 | 45.8 | 45.3 | 51.9 |
| GSM1344185 | 47.8 | 48.4 | 49.7 | 58.9 |
| GSM1344186 | 65.2 | 63.2 | 59.8 | 69.7 |
| GSM1344187 | 55.5 | 55.5 | 52.3 | 60.5 |
| GSM1344188 | 70.3 | 62.8 | 58.1 | 68.8 |
| GSM1344189 | 61.1 | 60.7 | 63.6 | 65.1 |
| GSM1344190 | 35.5 | 35.9 | 38.0 | 44.2 |
| GSM1344191 | 50.9 | 52.3 | 50.5 | 59.8 |
| GSM1344192 | 67.8 | 64.3 | 59.6 | 66.7 |
| GSM1344193 | 71.6 | 71.2 | 72.7 | 80.3 |
| GSM1344194 | 42.5 | 40.9 | 46.3 | 51.9 |
| GSM1344195 | 53.7 | 55.2 | 56.8 | 69.5 |
| GSM1344196 | 48.4 | 44.8 | 39.3 | 51.0 |
| GSM1344197 | 39.3 | 38.7 | 42.8 | 47.2 |
| GSM1344198 | 35.1 | 37.8 | 39.4 | 47.5 |
| GSM1344199 | 41.9 | 45.5 | 45.2 | 54.1 |
| GSM1344200 | 47.9 | 42.8 | 43.1 | 53.7 |
| GSM1344201 | 43.4 | 37.5 | 45.6 | 46.3 |
| GSM1344202 | 54.2 | 54.1 | 59.4 | 60.6 |
| GSM1344203 | 46.5 | 51.6 | 45.6 | 56.8 |
| GSM1344204 | 62.3 | 60.7 | 55.8 | 66.5 |
| GSM1344205 | 37.9 | 40.7 | 49.7 | 50.0 |
| GSM1344206 | 40.9 | 41.4 | 43.8 | 51.3 |
| GSM1344207 | 45.6 | 45.3 | 49.0 | 56.6 |
| GSM1344208 | 48.8 | 48.3 | 56.3 | 59.0 |

|            |      |      |      |      |
|------------|------|------|------|------|
| GSM1344209 | 38.3 | 36.4 | 42.5 | 43.2 |
| GSM1344210 | 37.2 | 41.7 | 48.2 | 53.2 |
| GSM1344211 | 70.7 | 63.0 | 63.5 | 69.9 |
| GSM1344212 | 46.0 | 46.4 | 43.7 | 54.0 |
| GSM1344213 | 50.0 | 51.0 | 52.0 | 58.6 |
| GSM1344214 | 47.9 | 56.3 | 68.2 | 69.9 |
| GSM1344215 | 56.0 | 53.7 | 55.5 | 63.9 |
| GSM1344216 | 52.6 | 48.9 | 52.8 | 57.9 |
| GSM1344217 | 54.0 | 55.5 | 54.2 | 63.9 |
| GSM1344218 | 43.4 | 45.7 | 49.4 | 56.4 |
| GSM1344219 | 48.5 | 46.7 | 47.5 | 59.3 |
| GSM1344220 | 48.2 | 55.1 | 55.2 | 58.3 |
| GSM1344221 | 55.7 | 51.2 | 48.0 | 57.4 |
| GSM1344222 | 44.0 | 41.4 | 47.0 | 47.5 |
| GSM1344223 | 36.7 | 40.5 | 43.2 | 46.3 |
| GSM1344224 | 70.4 | 72.0 | 66.6 | 76.0 |
| GSM1344225 | 48.4 | 47.6 | 49.9 | 58.3 |
| GSM1344226 | 64.1 | 72.5 | 71.7 | 73.4 |
| GSM1344227 | 35.2 | 38.1 | 38.3 | 43.4 |
| GSM1344228 | 52.7 | 53.2 | 55.3 | 59.3 |
| GSM1344229 | 40.2 | 42.6 | 51.8 | 55.7 |
| GSM1344230 | 64.0 | 60.8 | 62.1 | 66.8 |
| GSM1344231 | 60.6 | 59.1 | 61.4 | 70.8 |
| GSM1344232 | 35.6 | 36.1 | 43.1 | 43.8 |
| GSM1344233 | 41.0 | 39.1 | 45.7 | 49.5 |
| GSM1344234 | 67.8 | 67.9 | 70.6 | 74.5 |
| GSM1344235 | 46.0 | 36.5 | 46.8 | 48.4 |
| GSM1344236 | 54.1 | 51.1 | 47.1 | 55.8 |
| GSM1344237 | 46.9 | 52.4 | 58.6 | 61.8 |
| GSM1344238 | 36.3 | 39.6 | 41.6 | 48.5 |
| GSM1344239 | 46.5 | 48.1 | 52.3 | 56.4 |
| GSM1344240 | 35.2 | 33.4 | 37.3 | 46.1 |
| GSM1344241 | 43.6 | 44.1 | 51.7 | 55.6 |
| GSM1344242 | 48.3 | 43.2 | 45.4 | 53.0 |
| GSM1344243 | 51.8 | 53.4 | 54.7 | 59.5 |
| GSM1344244 | 53.7 | 58.3 | 56.6 | 66.9 |
| GSM1344245 | 51.6 | 47.1 | 46.5 | 52.8 |
| GSM1344246 | 69.8 | 68.8 | 60.3 | 71.2 |
| GSM1344247 | 35.5 | 38.8 | 40.7 | 46.9 |
| GSM1344248 | 58.5 | 61.9 | 68.9 | 71.1 |
| GSM1344249 | 49.2 | 43.3 | 44.3 | 57.7 |
| GSM1344250 | 51.0 | 57.4 | 57.8 | 65.9 |
| GSM1344251 | 54.8 | 59.2 | 57.4 | 64.3 |
| GSM1344252 | 50.7 | 58.4 | 63.2 | 68.7 |
| GSM1344253 | 61.5 | 65.9 | 65.2 | 71.0 |
| GSM1344254 | 61.1 | 57.6 | 64.4 | 67.8 |
| GSM1344255 | 56.4 | 52.2 | 56.9 | 57.8 |
| GSM1344256 | 39.4 | 39.2 | 41.0 | 47.2 |
| GSM1344257 | 60.4 | 59.0 | 73.0 | 67.1 |
| GSM1344258 | 51.7 | 52.0 | 55.7 | 61.4 |
| GSM1344259 | 51.9 | 48.3 | 50.5 | 54.1 |
| GSM1344260 | 56.8 | 53.7 | 55.8 | 62.8 |
| GSM1344261 | 39.5 | 41.1 | 43.6 | 49.8 |
| GSM1344262 | 41.7 | 43.6 | 47.6 | 53.3 |
| GSM1344263 | 45.0 | 49.9 | 51.5 | 59.0 |
| GSM1344264 | 52.8 | 46.3 | 49.6 | 50.2 |

|            |      |      |      |      |
|------------|------|------|------|------|
| GSM1344265 | 40.8 | 51.6 | 56.0 | 57.5 |
| GSM1344266 | 49.8 | 52.0 | 56.2 | 64.2 |
| GSM1344267 | 39.6 | 45.9 | 49.1 | 54.0 |
| GSM1344268 | 55.1 | 61.9 | 67.7 | 69.1 |
| GSM1344269 | 44.3 | 41.0 | 49.3 | 49.5 |
| GSM1344270 | 42.2 | 47.4 | 44.8 | 51.3 |
| GSM1344271 | 71.1 | 63.3 | 62.6 | 69.5 |
| GSM1344272 | 35.7 | 33.4 | 38.8 | 44.4 |
| GSM1344273 | 66.3 | 63.1 | 67.0 | 73.0 |
| GSM1344274 | 53.6 | 60.2 | 56.4 | 68.5 |
| GSM1344275 | 63.1 | 60.9 | 61.4 | 72.3 |
| GSM1344276 | 64.4 | 63.7 | 65.0 | 70.5 |
| GSM1344277 | 74.4 | 75.3 | 72.4 | 78.1 |
| GSM1344278 | 41.5 | 46.9 | 48.9 | 50.4 |
| GSM1344279 | 54.2 | 58.2 | 65.2 | 69.4 |
| GSM1344280 | 48.6 | 50.3 | 56.8 | 55.5 |
| GSM1344281 | 35.2 | 36.0 | 35.8 | 43.1 |
| GSM1344282 | 51.3 | 49.0 | 52.2 | 54.1 |
| GSM1344283 | 57.5 | 56.8 | 55.8 | 62.8 |
| GSM1344284 | 35.1 | 37.9 | 37.1 | 42.3 |
| GSM1344285 | 73.7 | 72.5 | 68.0 | 77.5 |
| GSM1344286 | 38.2 | 40.8 | 40.7 | 44.2 |
| GSM1344287 | 58.5 | 53.7 | 56.1 | 62.1 |
| GSM1344288 | 54.3 | 55.7 | 56.5 | 71.3 |
| GSM1344289 | 54.7 | 53.2 | 61.1 | 57.6 |
| GSM1344290 | 53.1 | 52.7 | 54.9 | 60.5 |
| GSM1344291 | 36.4 | 43.1 | 38.9 | 45.1 |
| GSM1344292 | 52.7 | 51.7 | 50.6 | 56.9 |
| GSM1344293 | 53.7 | 53.9 | 54.5 | 59.5 |
| GSM1344294 | 36.2 | 38.1 | 33.4 | 44.3 |
| GSM1344295 | 56.9 | 57.8 | 49.3 | 59.1 |
| GSM1344296 | 41.0 | 47.3 | 40.7 | 53.1 |
| GSM1344297 | 61.5 | 55.4 | 60.3 | 61.9 |
| GSM1344298 | 56.8 | 68.5 | 74.0 | 97.4 |
| GSM1344299 | 51.9 | 49.0 | 50.5 | 58.6 |
| GSM1344300 | 67.1 | 58.2 | 54.8 | 64.9 |
| GSM1344301 | 59.2 | 57.0 | 64.7 | 71.2 |
| GSM1344302 | 56.0 | 61.3 | 66.8 | 67.6 |
| GSM1344303 | 51.6 | 49.7 | 50.4 | 56.5 |
| GSM1344304 | 66.1 | 62.8 | 56.0 | 71.1 |
| GSM1344305 | 70.1 | 70.9 | 68.5 | 71.6 |
| GSM1344306 | 58.4 | 62.0 | 62.1 | 64.6 |
| GSM1344307 | 57.5 | 57.7 | 60.4 | 63.7 |
| GSM1344308 | 38.5 | 41.1 | 49.2 | 46.1 |
| GSM1344309 | 39.0 | 38.0 | 42.8 | 50.1 |
| GSM1344310 | 65.2 | 60.8 | 59.3 | 69.4 |
| GSM1344311 | 38.7 | 40.8 | 44.4 | 50.7 |
| GSM1344312 | 35.4 | 36.0 | 40.0 | 44.1 |
| GSM1344313 | 67.4 | 67.1 | 67.9 | 75.5 |
| GSM1344314 | 50.2 | 50.7 | 54.7 | 58.2 |
| GSM1344315 | 51.6 | 52.2 | 51.2 | 62.6 |
| GSM1344316 | 60.7 | 67.4 | 68.9 | 73.3 |
| GSM1344317 | 47.4 | 48.9 | 47.9 | 58.9 |
| GSM1344318 | 66.4 | 67.8 | 70.2 | 75.5 |
| GSM1344319 | 53.5 | 54.2 | 59.2 | 60.9 |
| GSM1344320 | 40.4 | 39.0 | 47.1 | 48.2 |

|            |      |      |      |      |
|------------|------|------|------|------|
| GSM1344321 | 74.4 | 77.7 | 81.6 | 75.4 |
| GSM1344322 | 47.5 | 53.7 | 53.8 | 58.5 |
| GSM1344323 | 64.2 | 62.9 | 63.5 | 75.0 |
| GSM1344324 | 64.3 | 63.3 | 69.4 | 76.5 |
| GSM1344325 | 53.9 | 59.8 | 64.8 | 67.3 |
| GSM1344326 | 35.3 | 32.8 | 40.1 | 45.6 |
| GSM1344327 | 42.1 | 46.5 | 50.5 | 58.3 |
| GSM1344328 | 36.3 | 36.2 | 41.3 | 46.7 |
| GSM1344329 | 49.3 | 50.7 | 53.0 | 63.5 |
| GSM1344330 | 47.6 | 50.5 | 49.4 | 60.3 |
| GSM1344331 | 43.2 | 43.0 | 50.3 | 54.0 |
| GSM1344332 | 67.5 | 66.2 | 66.4 | 78.9 |
| GSM1344333 | 40.6 | 42.7 | 43.1 | 56.5 |
| GSM1344334 | 35.1 | 40.5 | 32.2 | 46.7 |
| GSM1344335 | 63.7 | 63.1 | 65.2 | 67.5 |
| GSM1344336 | 67.0 | 62.5 | 59.7 | 68.6 |
| GSM1344337 | 52.9 | 55.2 | 54.7 | 65.9 |
| GSM1344338 | 66.0 | 63.7 | 60.7 | 68.1 |
| GSM1344339 | 50.4 | 53.6 | 58.2 | 60.9 |
| GSM1344340 | 46.1 | 50.4 | 49.9 | 61.5 |
| GSM1344341 | 47.9 | 50.5 | 50.4 | 62.2 |
| GSM1344342 | 36.3 | 34.8 | 35.1 | 48.8 |
| GSM1344343 | 58.2 | 60.0 | 54.8 | 67.8 |
| GSM1344344 | 64.4 | 65.0 | 60.7 | 66.9 |
| GSM1344345 | 64.8 | 63.6 | 63.3 | 65.3 |
| GSM1344346 | 59.4 | 60.9 | 57.5 | 67.8 |
| GSM1344347 | 40.3 | 44.1 | 40.5 | 48.7 |
| GSM1344348 | 50.5 | 49.9 | 54.7 | 59.6 |
| GSM1344349 | 35.9 | 38.6 | 45.7 | 48.8 |
| GSM1344350 | 48.5 | 51.8 | 50.9 | 61.5 |
| GSM1344351 | 42.8 | 39.5 | 38.8 | 51.1 |
| GSM1344352 | 37.5 | 39.6 | 45.3 | 48.5 |
| GSM1344353 | 45.6 | 47.4 | 49.2 | 57.8 |
| GSM1344354 | 36.4 | 40.6 | 38.4 | 53.4 |
| GSM1344355 | 43.3 | 44.4 | 39.3 | 56.8 |
| GSM1344356 | 56.0 | 57.7 | 60.2 | 70.5 |
| GSM1344357 | 35.5 | 42.3 | 42.8 | 50.0 |
| GSM1344358 | 46.9 | 50.9 | 49.7 | 57.1 |
| GSM1344359 | 52.7 | 51.7 | 51.1 | 61.9 |
| GSM1344360 | 73.4 | 62.2 | 61.8 | 67.9 |
| GSM1344361 | 62.9 | 72.5 | 61.8 | 75.2 |
| GSM1344362 | 39.4 | 39.7 | 44.9 | 53.6 |
| GSM1344363 | 65.0 | 58.8 | 65.0 | 68.0 |
| GSM1344364 | 49.2 | 52.8 | 52.4 | 60.3 |
| GSM1344365 | 51.3 | 53.8 | 57.2 | 58.0 |
| GSM1344366 | 52.9 | 53.2 | 54.9 | 62.7 |
| GSM1344367 | 41.9 | 39.2 | 46.6 | 50.2 |
| GSM1344368 | 36.8 | 36.0 | 40.9 | 44.0 |
| GSM1344369 | 46.6 | 45.0 | 44.7 | 59.9 |
| GSM1344370 | 55.2 | 59.2 | 59.2 | 63.3 |
| GSM1344371 | 40.5 | 41.5 | 41.8 | 50.2 |
| GSM1344372 | 55.3 | 56.4 | 54.9 | 64.1 |
| GSM1344373 | 35.2 | 33.6 | 39.1 | 42.0 |
| GSM1344374 | 39.8 | 42.7 | 46.0 | 55.3 |
| GSM1344375 | 60.2 | 63.9 | 64.0 | 68.4 |
| GSM1344376 | 36.0 | 37.6 | 41.2 | 47.2 |

|            |      |      |      |      |
|------------|------|------|------|------|
| GSM1344377 | 45.8 | 51.5 | 53.8 | 59.3 |
| GSM1344378 | 47.1 | 52.8 | 51.6 | 56.6 |
| GSM1344379 | 46.1 | 46.1 | 49.6 | 53.1 |
| GSM1344380 | 49.2 | 47.3 | 53.9 | 59.4 |
| GSM1344381 | 52.6 | 54.8 | 57.1 | 64.8 |
| GSM1344382 | 64.2 | 67.8 | 71.8 | 71.0 |
| GSM1344383 | 59.4 | 52.2 | 56.1 | 62.2 |
| GSM1344384 | 63.8 | 69.8 | 67.4 | 75.4 |
| GSM1344385 | 72.6 | 74.2 | 76.4 | 71.4 |
| GSM1344386 | 57.6 | 50.6 | 54.8 | 60.4 |
| GSM1344387 | 56.3 | 55.3 | 53.1 | 57.8 |
| GSM1344388 | 45.9 | 46.5 | 55.4 | 53.6 |
| GSM1344389 | 67.4 | 66.7 | 64.2 | 67.9 |
| GSM1344390 | 56.2 | 52.5 | 48.9 | 61.7 |
| GSM1344391 | 43.9 | 41.7 | 47.9 | 53.6 |
| GSM1344392 | 39.7 | 34.1 | 39.1 | 46.3 |
| GSM1344393 | 35.3 | 31.4 | 34.1 | 43.6 |
| GSM1344394 | 43.6 | 43.5 | 51.2 | 50.8 |
| GSM1344395 | 41.4 | 42.4 | 49.8 | 49.0 |
| GSM1344396 | 36.1 | 36.3 | 42.2 | 44.4 |
| GSM1344397 | 51.3 | 46.4 | 45.5 | 57.2 |
| GSM1344398 | 46.9 | 46.2 | 53.7 | 58.0 |
| GSM1344399 | 42.8 | 44.9 | 49.9 | 49.1 |
| GSM1344400 | 55.6 | 58.0 | 53.1 | 60.3 |
| GSM1344401 | 36.2 | 38.5 | 44.5 | 44.5 |
| GSM1344402 | 67.5 | 68.2 | 62.8 | 68.1 |
| GSM1344403 | 42.5 | 45.8 | 54.0 | 55.7 |
| GSM1344404 | 68.6 | 67.9 | 64.0 | 72.9 |
| GSM1344405 | 37.0 | 35.4 | 44.1 | 44.6 |
| GSM1344406 | 48.8 | 53.1 | 58.2 | 66.2 |
| GSM1344407 | 40.5 | 42.3 | 45.4 | 47.8 |
| GSM1344408 | 35.6 | 40.0 | 40.1 | 48.8 |
| GSM1344409 | 48.9 | 49.7 | 53.9 | 58.8 |
| GSM1344410 | 52.5 | 53.0 | 51.1 | 62.5 |
| GSM1344411 | 46.9 | 47.9 | 47.0 | 57.1 |
| GSM1344412 | 46.8 | 47.6 | 46.4 | 56.4 |
| GSM1344413 | 48.4 | 48.2 | 43.0 | 52.1 |
| GSM1344414 | 57.5 | 57.5 | 57.8 | 64.9 |
| GSM1344415 | 56.6 | 60.7 | 56.6 | 64.4 |
| GSM1344416 | 55.1 | 56.1 | 63.1 | 59.8 |
| GSM1344417 | 52.4 | 52.9 | 51.9 | 55.9 |
| GSM1344418 | 50.8 | 53.0 | 51.0 | 56.9 |
| GSM1344419 | 55.2 | 48.0 | 54.4 | 59.1 |
| GSM1344420 | 63.7 | 62.8 | 57.2 | 67.1 |
| GSM1344421 | 43.6 | 41.6 | 39.4 | 48.4 |
| GSM1344422 | 35.3 | 40.1 | 42.1 | 46.5 |
| GSM1344423 | 45.1 | 46.4 | 47.4 | 54.0 |
| GSM1344424 | 47.9 | 45.9 | 47.9 | 51.3 |
| GSM1344425 | 58.0 | 55.1 | 49.1 | 62.6 |
| GSM1344426 | 52.9 | 56.1 | 51.3 | 62.5 |
| GSM1344427 | 47.4 | 47.4 | 46.5 | 55.0 |
| GSM1344428 | 47.7 | 47.8 | 51.2 | 58.1 |
| GSM1344429 | 51.9 | 51.4 | 56.9 | 60.4 |
| GSM1344430 | 51.2 | 54.1 | 55.6 | 65.7 |
| GSM1344431 | 66.2 | 60.6 | 63.1 | 69.5 |
| GSM1344432 | 48.2 | 46.1 | 50.6 | 51.7 |

|            |      |      |      |      |
|------------|------|------|------|------|
| GSM1344433 | 50.2 | 52.0 | 54.3 | 51.1 |
| GSM1344434 | 50.9 | 46.7 | 50.6 | 52.3 |
| GSM1344435 | 59.3 | 61.4 | 58.1 | 67.3 |
| GSM1344436 | 56.6 | 55.5 | 61.1 | 67.5 |
| GSM1344437 | 55.0 | 56.4 | 57.3 | 62.1 |
| GSM1344438 | 48.0 | 47.5 | 49.0 | 54.2 |
| GSM1344439 | 65.2 | 72.8 | 69.8 | 77.6 |
| GSM1344440 | 66.2 | 57.5 | 62.3 | 71.2 |
| GSM1344441 | 59.0 | 56.9 | 60.0 | 69.9 |
| GSM1344442 | 42.7 | 43.5 | 49.3 | 54.4 |
| GSM1344443 | 71.8 | 68.6 | 73.0 | 74.8 |
| GSM1344444 | 51.4 | 51.3 | 49.1 | 55.9 |
| GSM1344445 | 65.4 | 58.5 | 64.5 | 65.6 |
| GSM1344446 | 42.1 | 46.3 | 42.8 | 54.0 |
| GSM1344447 | 41.5 | 40.3 | 41.4 | 47.4 |
| GSM1344448 | 64.0 | 57.6 | 57.8 | 69.0 |
| GSM1344449 | 35.8 | 37.8 | 42.2 | 46.1 |
| GSM1344450 | 42.7 | 39.3 | 43.4 | 48.1 |
| GSM1344451 | 46.1 | 47.1 | 50.5 | 56.6 |
| GSM1344452 | 55.5 | 57.1 | 52.9 | 65.2 |
| GSM1344453 | 54.0 | 52.1 | 55.7 | 61.5 |
| GSM1344454 | 47.2 | 49.7 | 52.1 | 62.6 |
| GSM1344455 | 44.9 | 44.6 | 50.9 | 50.5 |
| GSM1344456 | 56.5 | 52.1 | 54.6 | 58.9 |
| GSM1344457 | 35.2 | 35.4 | 38.9 | 46.9 |
| GSM1344458 | 54.1 | 55.7 | 55.2 | 58.9 |
| GSM1344459 | 71.2 | 64.1 | 69.4 | 71.1 |
| GSM1344460 | 49.1 | 55.5 | 49.2 | 64.6 |
| GSM1344461 | 69.9 | 71.3 | 75.0 | 76.9 |
| GSM1344462 | 68.1 | 67.6 | 61.7 | 70.4 |
| GSM1344463 | 35.2 | 38.2 | 40.5 | 45.8 |
| GSM1344464 | 55.5 | 58.2 | 62.0 | 71.4 |
| GSM1344465 | 54.7 | 51.6 | 60.5 | 62.3 |
| GSM1344466 | 44.5 | 47.0 | 48.5 | 57.4 |
| GSM1344467 | 74.5 | 82.3 | 74.4 | 80.7 |
| GSM1344468 | 51.9 | 50.7 | 52.2 | 60.0 |
| GSM1344469 | 45.5 | 47.8 | 46.7 | 50.2 |
| GSM1344470 | 43.0 | 50.2 | 46.7 | 53.4 |
| GSM1344471 | 55.3 | 57.7 | 53.2 | 61.7 |
| GSM1344472 | 43.6 | 44.5 | 45.9 | 54.1 |
| GSM1344473 | 49.4 | 52.4 | 51.0 | 56.1 |
| GSM1344474 | 44.7 | 48.2 | 50.6 | 53.3 |
| GSM1344475 | 44.4 | 47.4 | 47.3 | 54.5 |
| GSM1344476 | 64.4 | 58.9 | 63.7 | 66.7 |
| GSM1344477 | 40.0 | 47.2 | 45.3 | 55.4 |
| GSM1344478 | 39.1 | 41.1 | 39.1 | 51.9 |
| GSM1344479 | 71.8 | 61.2 | 89.7 | 77.7 |
| GSM1344480 | 59.1 | 54.4 | 54.2 | 64.1 |
| GSM1344481 | 46.5 | 44.6 | 37.9 | 55.5 |
| GSM1344482 | 55.9 | 53.4 | 48.5 | 64.6 |
| GSM1344483 | 41.9 | 47.3 | 47.0 | 59.6 |
| GSM1344484 | 47.8 | 47.7 | 48.3 | 48.1 |
| GSM1344485 | 68.2 | 65.0 | 59.8 | 71.0 |
| GSM1344486 | 63.6 | 77.2 | 70.0 | 72.7 |
| GSM1344487 | 58.3 | 54.8 | 52.7 | 64.3 |
| GSM1344488 | 63.5 | 63.9 | 57.3 | 68.0 |

|            |      |      |      |      |
|------------|------|------|------|------|
| GSM1344489 | 45.0 | 49.4 | 50.2 | 63.5 |
| GSM1344490 | 44.1 | 39.5 | 43.1 | 53.6 |
| GSM1344491 | 60.6 | 56.8 | 56.8 | 66.3 |
| GSM1344492 | 35.2 | 35.9 | 41.5 | 46.5 |
| GSM1344493 | 44.3 | 47.2 | 43.7 | 55.3 |
| GSM1344494 | 44.9 | 39.5 | 42.7 | 47.3 |
| GSM1344495 | 45.9 | 48.9 | 49.4 | 55.7 |
| GSM1344496 | 63.4 | 64.7 | 57.4 | 76.1 |
| GSM1344497 | 56.6 | 57.7 | 57.8 | 68.8 |
| GSM1344498 | 36.9 | 33.7 | 33.9 | 42.3 |
| GSM1344499 | 48.9 | 43.8 | 49.9 | 57.0 |
| GSM1344500 | 50.5 | 44.6 | 49.6 | 55.7 |
| GSM1344501 | 37.8 | 38.4 | 37.8 | 46.5 |
| GSM1344502 | 52.8 | 54.4 | 56.3 | 61.7 |
| GSM1344503 | 68.6 | 63.0 | 67.7 | 72.4 |
| GSM1344504 | 57.3 | 53.3 | 57.2 | 52.9 |
| GSM1344505 | 42.1 | 53.6 | 55.0 | 60.3 |
| GSM1344506 | 48.1 | 47.4 | 47.2 | 58.7 |
| GSM1344507 | 54.5 | 51.6 | 51.5 | 52.4 |
| GSM1344508 | 48.1 | 51.1 | 55.5 | 56.7 |
| GSM1344509 | 72.1 | 76.7 | 78.3 | 81.0 |
| GSM1344510 | 52.1 | 55.2 | 58.0 | 63.1 |
| GSM1344511 | 72.9 | 71.4 | 72.0 | 78.3 |
| GSM1344512 | 56.9 | 57.0 | 61.9 | 65.4 |
| GSM1344513 | 56.5 | 56.1 | 52.0 | 68.2 |
| GSM1344514 | 74.4 | 74.7 | 76.4 | 85.8 |
| GSM1344515 | 60.6 | 54.7 | 62.2 | 63.7 |
| GSM1344516 | 40.9 | 41.7 | 42.7 | 52.4 |
| GSM1344517 | 46.4 | 42.7 | 47.5 | 54.7 |
| GSM1344518 | 58.7 | 64.5 | 63.7 | 68.6 |
| GSM1344519 | 36.1 | 37.6 | 41.0 | 46.6 |
| GSM1344520 | 54.7 | 59.5 | 61.5 | 67.0 |
| GSM1344521 | 51.9 | 47.6 | 47.9 | 56.8 |
| GSM1344522 | 58.9 | 59.4 | 63.1 | 67.4 |
| GSM1344523 | 42.7 | 46.4 | 50.0 | 53.7 |
| GSM1344524 | 39.3 | 38.8 | 47.9 | 46.6 |
| GSM1344525 | 49.1 | 50.2 | 55.1 | 58.4 |
| GSM1344526 | 52.7 | 48.3 | 53.3 | 53.8 |
| GSM1344527 | 64.6 | 66.8 | 65.3 | 75.0 |
| GSM1344528 | 62.0 | 57.0 | 58.3 | 71.0 |
| GSM1344529 | 55.0 | 59.0 | 62.0 | 63.7 |
| GSM1344530 | 56.1 | 52.3 | 55.6 | 64.0 |
| GSM1344531 | 47.7 | 44.4 | 52.8 | 54.2 |
| GSM1344532 | 42.0 | 44.2 | 52.3 | 51.3 |
| GSM1344533 | 67.2 | 66.2 | 63.0 | 74.5 |
| GSM1344534 | 52.8 | 47.0 | 53.0 | 59.2 |
| GSM1344535 | 70.3 | 63.3 | 60.9 | 65.3 |
| GSM1344536 | 36.4 | 32.2 | 36.9 | 44.2 |
| GSM1344537 | 49.0 | 53.6 | 56.3 | 66.0 |
| GSM1344538 | 54.3 | 58.3 | 56.3 | 62.1 |
| GSM1344539 | 42.0 | 39.9 | 45.7 | 44.8 |
| GSM1344540 | 50.8 | 53.2 | 50.5 | 60.5 |
| GSM1344541 | 50.5 | 50.8 | 57.4 | 60.5 |
| GSM1344542 | 47.3 | 44.9 | 47.7 | 54.7 |
| GSM1344543 | 46.4 | 50.6 | 53.4 | 58.0 |
| GSM1344544 | 38.3 | 36.6 | 32.2 | 47.5 |

|            |      |      |      |      |
|------------|------|------|------|------|
| GSM1344545 | 48.0 | 50.1 | 48.3 | 55.5 |
| GSM1344546 | 49.5 | 50.0 | 50.1 | 57.4 |
| GSM1344547 | 42.6 | 39.4 | 42.3 | 51.0 |
| GSM1344548 | 38.7 | 41.2 | 45.0 | 50.8 |
| GSM1344549 | 50.9 | 50.8 | 49.7 | 57.6 |
| GSM1344550 | 55.3 | 51.5 | 50.6 | 61.5 |
| GSM1344551 | 57.0 | 57.2 | 57.1 | 65.0 |
| GSM1344552 | 68.9 | 64.7 | 68.5 | 70.6 |
| GSM1344553 | 38.7 | 41.0 | 46.0 | 49.2 |
| GSM1344554 | 53.5 | 57.0 | 60.7 | 66.5 |
| GSM1344555 | 60.5 | 63.5 | 64.9 | 69.2 |
| GSM1344556 | 44.9 | 46.5 | 51.1 | 53.3 |
| GSM1344557 | 37.3 | 38.5 | 40.9 | 44.3 |
| GSM1344558 | 54.8 | 53.8 | 54.2 | 62.6 |
| GSM1344559 | 67.6 | 73.3 | 66.3 | 75.1 |
| GSM1344560 | 49.6 | 57.3 | 63.2 | 62.9 |
| GSM1344561 | 41.7 | 42.7 | 44.1 | 49.3 |
| GSM1344562 | 35.6 | 40.8 | 42.7 | 39.7 |
| GSM1344563 | 45.0 | 49.0 | 44.7 | 54.0 |
| GSM1344564 | 64.7 | 68.3 | 68.5 | 76.1 |
| GSM1344565 | 51.7 | 46.9 | 48.8 | 58.2 |
| GSM1344566 | 72.5 | 70.9 | 64.4 | 72.4 |
| GSM1344567 | 50.1 | 56.7 | 56.9 | 61.5 |
| GSM1344568 | 40.7 | 45.1 | 48.5 | 48.3 |
| GSM1344569 | 41.3 | 43.8 | 45.0 | 50.6 |
| GSM1344570 | 39.3 | 32.5 | 42.9 | 41.8 |
| GSM1344571 | 36.3 | 37.2 | 42.5 | 44.2 |
| GSM1344572 | 44.4 | 44.2 | 44.6 | 49.7 |
| GSM1344573 | 47.3 | 43.9 | 50.4 | 53.3 |
| GSM1344574 | 35.1 | 39.0 | 44.6 | 47.4 |
| GSM1344575 | 57.6 | 54.2 | 56.4 | 64.0 |
| GSM1344576 | 59.1 | 56.0 | 60.9 | 65.7 |
| GSM1344577 | 48.6 | 49.4 | 49.9 | 58.8 |
| GSM1344578 | 42.0 | 48.5 | 45.1 | 56.5 |
| GSM1344579 | 47.2 | 49.2 | 49.1 | 56.7 |
| GSM1344580 | 46.3 | 45.0 | 48.4 | 51.7 |
| GSM1344581 | 53.1 | 58.3 | 56.4 | 67.4 |
| GSM1344582 | 58.5 | 61.0 | 59.2 | 69.8 |
| GSM1344583 | 68.5 | 62.1 | 63.4 | 69.4 |
| GSM1344584 | 67.1 | 62.8 | 67.2 | 73.8 |
| GSM1344585 | 49.2 | 51.4 | 55.9 | 59.8 |
| GSM1344586 | 45.7 | 42.0 | 43.8 | 49.4 |
| GSM1344587 | 35.3 | 37.4 | 48.1 | 46.7 |
| GSM1344588 | 45.0 | 44.0 | 45.9 | 58.1 |
| GSM1344589 | 61.7 | 56.9 | 61.8 | 63.3 |
| GSM1344590 | 48.8 | 53.8 | 56.2 | 62.0 |
| GSM1344591 | 70.3 | 64.9 | 67.7 | 74.9 |
| GSM1344592 | 35.4 | 36.6 | 46.0 | 45.3 |
| GSM1344593 | 39.4 | 40.6 | 42.3 | 50.5 |
| GSM1344594 | 41.7 | 43.3 | 47.9 | 53.7 |
| GSM1344595 | 53.9 | 53.1 | 51.0 | 62.2 |
| GSM1344596 | 46.9 | 48.0 | 51.9 | 56.0 |
| GSM1344597 | 56.5 | 56.0 | 59.7 | 63.8 |
| GSM1344598 | 37.2 | 41.1 | 39.7 | 51.4 |
| GSM1344599 | 45.7 | 46.4 | 46.0 | 52.5 |
| GSM1344600 | 48.6 | 50.0 | 51.4 | 54.9 |



|            |      |      |      |      |
|------------|------|------|------|------|
| GSM1344601 | 48.3 | 41.2 | 49.3 | 53.8 |
| GSM1344602 | 46.2 | 45.2 | 48.6 | 56.8 |
| GSM1344603 | 47.1 | 48.3 | 57.5 | 58.1 |
| GSM1344604 | 48.8 | 43.0 | 48.2 | 50.8 |
| GSM1344605 | 43.4 | 45.7 | 50.4 | 52.8 |
| GSM1344606 | 35.1 | 36.2 | 35.9 | 47.2 |
| GSM1344607 | 40.0 | 43.0 | 44.9 | 50.9 |
| GSM1344608 | 45.7 | 42.8 | 44.1 | 52.5 |
| GSM1344609 | 39.3 | 39.4 | 45.2 | 47.1 |
| GSM1344610 | 47.9 | 48.9 | 57.0 | 58.1 |
| GSM1344611 | 57.7 | 51.0 | 55.6 | 61.6 |
| GSM1344612 | 50.5 | 54.8 | 58.5 | 52.1 |
| GSM1344613 | 37.5 | 36.5 | 41.7 | 36.3 |
| GSM1344614 | 48.0 | 46.1 | 53.5 | 55.8 |
| GSM1344615 | 35.7 | 44.5 | 46.3 | 50.2 |
| GSM1344616 | 50.1 | 47.8 | 50.3 | 56.7 |
| GSM1344617 | 37.6 | 38.8 | 45.3 | 44.0 |
| GSM1344618 | 46.0 | 48.0 | 50.1 | 53.2 |
| GSM1344619 | 40.4 | 39.6 | 40.6 | 50.2 |
| GSM1344620 | 47.0 | 51.1 | 51.0 | 57.2 |
| GSM1344621 | 65.6 | 67.2 | 61.6 | 74.6 |
| GSM1344622 | 35.3 | 39.2 | 39.1 | 45.4 |
| GSM1344623 | 47.1 | 44.7 | 48.5 | 56.2 |
| GSM1344624 | 39.9 | 36.2 | 43.5 | 48.6 |
| GSM1344625 | 46.6 | 47.6 | 45.3 | 48.6 |
| GSM1344626 | 60.8 | 59.0 | 60.4 | 67.5 |
| GSM1344627 | 35.1 | 38.6 | 37.2 | 42.4 |
| GSM1344628 | 52.1 | 48.7 | 50.3 | 59.5 |
| GSM1344629 | 47.4 | 45.1 | 52.5 | 56.4 |
| GSM1344630 | 47.9 | 51.4 | 50.0 | 61.7 |
| GSM1344631 | 41.6 | 42.3 | 43.7 | 53.2 |
| GSM1344632 | 45.8 | 43.4 | 46.5 | 46.6 |
| GSM1344633 | 36.6 | 30.8 | 37.2 | 44.5 |
| GSM1344634 | 48.7 | 52.2 | 50.7 | 57.7 |
| GSM1344635 | 44.3 | 43.7 | 47.0 | 54.4 |
| GSM1344636 | 55.2 | 58.7 | 59.1 | 64.8 |
| GSM1344637 | 54.8 | 50.8 | 53.0 | 60.0 |
| GSM1344638 | 36.5 | 29.3 | 33.6 | 36.5 |
| GSM1344639 | 45.7 | 47.7 | 52.2 | 57.6 |
| GSM1344640 | 31.4 | 33.4 | 38.9 | 45.5 |
| GSM1344641 | 54.8 | 54.6 | 57.5 | 56.2 |
| GSM1344642 | 42.5 | 51.3 | 56.5 | 57.3 |
| GSM1344643 | 58.4 | 58.7 | 59.4 | 62.8 |
| GSM1344644 | 50.1 | 49.9 | 57.2 | 56.8 |
| GSM1344645 | 57.0 | 54.7 | 59.6 | 65.3 |
| GSM1344646 | 51.6 | 45.2 | 48.5 | 52.7 |
| GSM1344647 | 70.9 | 67.7 | 67.2 | 72.1 |
| GSM1344648 | 42.2 | 44.0 | 48.2 | 52.7 |
| GSM1344649 | 35.7 | 39.6 | 44.4 | 48.8 |
| GSM1344650 | 47.3 | 48.2 | 47.7 | 54.6 |
| GSM1344651 | 36.0 | 39.4 | 46.8 | 47.0 |
| GSM1344652 | 39.2 | 43.4 | 37.3 | 43.1 |
| GSM1344653 | 41.8 | 47.9 | 52.0 | 55.3 |
| GSM1344654 | 58.3 | 62.9 | 64.1 | 67.0 |
| GSM1344655 | 35.4 | 40.7 | 45.2 | 44.1 |
| GSM1344656 | 51.9 | 50.3 | 54.2 | 55.3 |

|            |      |      |      |      |
|------------|------|------|------|------|
| GSM1344657 | 50.6 | 48.1 | 51.4 | 58.2 |
| GSM1344658 | 67.4 | 64.3 | 64.3 | 70.4 |
| GSM1344659 | 37.0 | 34.2 | 38.4 | 43.3 |
| GSM1344660 | 35.2 | 34.6 | 30.2 | 39.1 |
| GSM1344661 | 71.4 | 69.2 | 68.7 | 76.2 |
| GSM1344662 | 71.2 | 71.9 | 71.8 | 75.1 |
| GSM1344663 | 52.8 | 57.1 | 56.7 | 63.1 |
| GSM1344664 | 41.5 | 42.9 | 45.1 | 50.3 |
| GSM1344665 | 48.6 | 49.1 | 49.8 | 58.1 |
| GSM1344666 | 42.3 | 46.3 | 44.1 | 53.5 |
| GSM1344667 | 35.2 | 40.0 | 36.6 | 47.4 |
| GSM1344668 | 45.4 | 43.6 | 46.0 | 54.7 |
| GSM1344669 | 45.6 | 49.0 | 46.9 | 48.8 |
| GSM1344670 | 60.9 | 65.0 | 71.0 | 68.9 |
| GSM1344671 | 55.6 | 54.1 | 53.2 | 58.3 |
| GSM1344672 | 51.4 | 50.6 | 52.6 | 56.5 |
| GSM1344673 | 72.4 | 68.4 | 69.0 | 81.5 |
| GSM1344674 | 71.5 | 68.0 | 61.5 | 69.5 |
| GSM1344675 | 39.9 | 39.7 | 41.3 | 50.3 |
| GSM1344676 | 71.3 | 75.4 | 71.3 | 84.4 |
| GSM1344677 | 53.9 | 50.7 | 56.1 | 64.3 |
| GSM1344678 | 49.9 | 54.4 | 58.5 | 64.6 |
| GSM1344679 | 37.8 | 39.9 | 42.8 | 50.8 |
| GSM1344680 | 64.3 | 62.1 | 58.2 | 67.7 |
| GSM1344681 | 43.4 | 44.2 | 48.1 | 49.9 |
| GSM1344682 | 48.4 | 50.0 | 47.5 | 54.1 |
| GSM1344683 | 43.2 | 41.3 | 46.1 | 52.5 |
| GSM1344684 | 66.9 | 70.5 | 65.8 | 71.1 |
| GSM1344685 | 70.3 | 63.0 | 63.2 | 72.1 |
| GSM1344686 | 51.5 | 55.2 | 59.3 | 63.6 |
| GSM1344687 | 66.5 | 62.3 | 68.2 | 74.7 |
| GSM1344688 | 54.4 | 55.2 | 48.7 | 62.9 |
| GSM1344689 | 52.2 | 51.4 | 48.2 | 67.0 |
| GSM1344690 | 48.3 | 48.2 | 47.5 | 54.5 |
| GSM1344691 | 45.2 | 42.6 | 43.3 | 53.5 |
| GSM1344692 | 53.6 | 54.1 | 58.5 | 69.6 |
| GSM1344693 | 53.9 | 51.0 | 47.1 | 53.6 |
| GSM1344694 | 46.1 | 48.6 | 49.2 | 56.1 |
| GSM1344695 | 60.4 | 54.8 | 57.6 | 64.6 |
| GSM1344696 | 49.2 | 46.0 | 44.1 | 52.6 |
| GSM1344697 | 66.6 | 71.6 | 63.5 | 71.2 |
| GSM1344698 | 42.0 | 45.3 | 44.8 | 54.2 |
| GSM1344699 | 40.5 | 41.6 | 43.8 | 48.8 |
| GSM1344700 | 57.3 | 61.0 | 62.9 | 70.3 |
| GSM1344701 | 69.8 | 68.9 | 62.4 | 75.0 |
| GSM1344702 | 50.3 | 46.7 | 52.8 | 54.2 |
| GSM1344703 | 41.9 | 41.8 | 45.4 | 52.1 |
| GSM1344704 | 46.7 | 44.3 | 51.0 | 50.3 |
| GSM1344705 | 52.3 | 65.8 | 61.9 | 68.8 |
| GSM1344706 | 53.0 | 47.3 | 50.9 | 57.7 |
| GSM1344707 | 65.1 | 67.0 | 59.1 | 69.4 |
| GSM1344708 | 64.1 | 60.2 | 56.0 | 68.7 |
| GSM1344709 | 50.2 | 52.7 | 55.0 | 59.3 |
| GSM1344710 | 40.2 | 41.3 | 41.5 | 49.8 |
| GSM1344711 | 63.3 | 64.1 | 63.8 | 65.3 |
| GSM1344712 | 48.9 | 54.6 | 56.1 | 61.8 |

|            |      |      |      |      |
|------------|------|------|------|------|
| GSM1344713 | 35.2 | 34.2 | 42.2 | 44.5 |
| GSM1344714 | 40.0 | 37.1 | 38.9 | 46.7 |
| GSM1344715 | 48.4 | 46.2 | 48.2 | 54.8 |
| GSM1344716 | 39.5 | 37.8 | 44.2 | 41.5 |
| GSM1344717 | 45.9 | 42.5 | 47.3 | 53.4 |
| GSM1344718 | 67.7 | 67.1 | 75.5 | 71.3 |
| GSM1344719 | 49.8 | 50.9 | 57.9 | 57.9 |
| GSM1344720 | 42.4 | 43.2 | 50.4 | 51.3 |
| GSM1344721 | 56.9 | 56.2 | 55.3 | 64.1 |
| GSM1344722 | 62.5 | 61.2 | 62.6 | 68.6 |
| GSM1344723 | 54.8 | 54.1 | 55.4 | 61.5 |
| GSM1344724 | 50.4 | 53.4 | 50.8 | 59.9 |
| GSM1344725 | 36.7 | 37.1 | 38.4 | 45.2 |
| GSM1344726 | 50.1 | 51.7 | 58.1 | 62.2 |
| GSM1344727 | 61.2 | 66.1 | 66.7 | 70.4 |
| GSM1344728 | 42.9 | 47.9 | 49.7 | 49.2 |
| GSM1344729 | 45.9 | 48.6 | 52.3 | 52.9 |
| GSM1344730 | 68.4 | 68.3 | 69.0 | 73.0 |
| GSM1344731 | 61.7 | 62.6 | 56.4 | 69.0 |
| GSM1344732 | 37.7 | 41.4 | 42.7 | 46.8 |
| GSM1344733 | 55.3 | 52.2 | 53.8 | 62.2 |
| GSM1344734 | 43.5 | 44.9 | 48.5 | 48.1 |
| GSM1344735 | 41.5 | 42.8 | 44.9 | 54.7 |
| GSM1344736 | 46.9 | 45.4 | 48.2 | 53.1 |
| GSM1344737 | 61.9 | 64.7 | 66.1 | 69.7 |
| GSM1344738 | 73.8 | 63.5 | 58.1 | 70.5 |
| GSM1344739 | 36.1 | 38.2 | 40.6 | 49.0 |
| GSM1344740 | 54.7 | 54.5 | 53.5 | 59.0 |
| GSM1344741 | 54.2 | 49.7 | 56.3 | 61.7 |
| GSM1344742 | 50.6 | 50.0 | 50.3 | 56.7 |
| GSM1344743 | 41.7 | 43.4 | 44.3 | 51.9 |
| GSM1344744 | 43.2 | 39.6 | 40.9 | 47.8 |
| GSM1344745 | 42.4 | 44.1 | 43.1 | 52.7 |
| GSM1344746 | 48.0 | 46.3 | 46.1 | 53.5 |
| GSM1344747 | 67.7 | 63.0 | 66.6 | 73.4 |
| GSM1344748 | 60.1 | 64.5 | 62.9 | 76.7 |
| GSM1344749 | 66.6 | 67.2 | 63.4 | 71.4 |
| GSM1344750 | 43.2 | 43.1 | 49.3 | 53.4 |
| GSM1344751 | 45.6 | 41.1 | 43.7 | 47.1 |
| GSM1344752 | 49.2 | 53.2 | 48.7 | 62.8 |
| GSM1344753 | 53.0 | 56.9 | 51.9 | 59.9 |
| GSM1344754 | 43.2 | 44.0 | 45.4 | 54.0 |
| GSM1344755 | 56.2 | 59.0 | 64.8 | 63.7 |
| GSM1344756 | 39.7 | 40.7 | 40.6 | 50.2 |
| GSM1344757 | 53.3 | 60.4 | 57.5 | 64.6 |
| GSM1344758 | 50.7 | 49.8 | 54.2 | 60.2 |
| GSM1344759 | 55.4 | 51.7 | 53.1 | 55.1 |
| GSM1344760 | 39.9 | 38.8 | 44.1 | 50.9 |
| GSM1344761 | 35.1 | 38.2 | 43.8 | 45.6 |
| GSM1344762 | 69.9 | 61.5 | 62.3 | 75.3 |
| GSM1344763 | 39.7 | 46.7 | 50.7 | 59.0 |
| GSM1344764 | 54.7 | 59.9 | 63.2 | 61.1 |
| GSM1344765 | 44.3 | 44.9 | 47.3 | 63.4 |
| GSM1344766 | 35.2 | 34.6 | 36.9 | 45.2 |
| GSM1344767 | 62.8 | 56.9 | 57.6 | 62.2 |
| GSM1344768 | 44.3 | 41.0 | 45.1 | 50.4 |

|            |      |      |      |      |
|------------|------|------|------|------|
| GSM1344769 | 46.8 | 50.7 | 49.6 | 59.0 |
| GSM1344770 | 61.8 | 64.6 | 62.5 | 70.9 |
| GSM1344771 | 61.8 | 57.3 | 58.4 | 67.1 |
| GSM1344772 | 44.6 | 43.5 | 43.1 | 54.1 |
| GSM1344773 | 53.6 | 59.4 | 61.2 | 66.6 |
| GSM1344774 | 37.0 | 35.2 | 43.7 | 43.1 |
| GSM1344775 | 62.3 | 63.1 | 61.5 | 63.4 |
| GSM1344776 | 71.2 | 66.7 | 68.0 | 69.9 |
| GSM1344777 | 58.0 | 60.2 | 52.1 | 59.9 |
| GSM1344778 | 61.1 | 60.2 | 54.7 | 68.3 |
| GSM1344779 | 36.2 | 37.6 | 40.5 | 43.2 |
| GSM1344780 | 69.3 | 72.5 | 63.6 | 75.7 |
| GSM1344781 | 59.7 | 54.7 | 61.0 | 67.1 |
| GSM1344782 | 35.5 | 34.7 | 35.1 | 43.8 |
| GSM1344783 | 54.5 | 52.6 | 56.3 | 57.5 |
| GSM1344784 | 36.9 | 41.0 | 47.9 | 46.2 |
| GSM1344785 | 47.5 | 47.2 | 48.0 | 55.8 |
| GSM1344786 | 50.1 | 51.9 | 55.4 | 62.0 |
| GSM1344787 | 39.2 | 40.2 | 50.8 | 51.9 |
| GSM1344788 | 45.4 | 43.3 | 49.3 | 54.4 |
| GSM1344789 | 54.8 | 55.8 | 56.3 | 63.1 |
| GSM1344790 | 57.7 | 55.3 | 58.0 | 65.9 |
| GSM1344791 | 36.0 | 35.7 | 41.0 | 39.8 |
| GSM1344792 | 53.0 | 58.0 | 59.0 | 66.5 |
| GSM1344793 | 53.9 | 53.4 | 55.0 | 54.4 |
| GSM1344794 | 35.1 | 37.1 | 34.4 | 47.3 |
| GSM1344795 | 42.7 | 40.4 | 44.6 | 52.3 |
| GSM1344796 | 57.0 | 61.7 | 64.3 | 63.8 |
| GSM1344797 | 52.9 | 50.8 | 51.1 | 49.5 |
| GSM1344798 | 60.5 | 59.5 | 62.9 | 66.2 |
| GSM1344799 | 57.9 | 53.2 | 55.1 | 57.9 |
| GSM1344800 | 71.6 | 69.7 | 64.0 | 70.3 |
| GSM1344801 | 45.2 | 49.8 | 49.8 | 51.7 |
| GSM1344802 | 36.9 | 40.8 | 42.3 | 47.8 |
| GSM1344803 | 64.3 | 56.8 | 58.8 | 65.4 |
| GSM1344804 | 40.0 | 45.2 | 47.5 | 51.3 |
| GSM1344805 | 73.7 | 75.3 | 69.8 | 86.4 |
| GSM1344806 | 64.1 | 73.9 | 78.2 | 77.3 |
| GSM1344807 | 40.4 | 40.2 | 45.7 | 54.6 |
| GSM1344808 | 36.4 | 38.3 | 43.0 | 49.2 |
| GSM1344809 | 56.4 | 57.2 | 61.4 | 62.1 |
| GSM1344810 | 52.2 | 54.1 | 45.9 | 69.7 |
| GSM1344811 | 49.6 | 48.5 | 50.3 | 55.3 |
| GSM1344812 | 50.8 | 48.3 | 51.6 | 57.0 |
| GSM1344813 | 47.5 | 45.5 | 44.7 | 53.4 |
| GSM1344814 | 56.3 | 57.3 | 60.7 | 64.4 |
| GSM1344815 | 37.6 | 38.5 | 40.7 | 44.4 |
| GSM1344816 | 49.9 | 49.5 | 56.3 | 55.1 |
| GSM1344817 | 54.2 | 46.8 | 47.8 | 55.9 |
| GSM1344818 | 35.5 | 34.4 | 40.1 | 43.3 |
| GSM1344819 | 35.2 | 34.8 | 40.6 | 43.7 |
| GSM1344820 | 35.2 | 37.7 | 37.1 | 44.5 |
| GSM1344821 | 73.8 | 72.7 | 68.7 | 78.5 |
| GSM1344822 | 46.1 | 61.0 | 57.7 | 66.6 |
| GSM1344823 | 50.2 | 54.7 | 57.4 | 67.4 |
| GSM1344824 | 42.6 | 44.8 | 47.3 | 54.2 |

|            |      |      |      |      |
|------------|------|------|------|------|
| GSM1344825 | 48.0 | 49.5 | 48.1 | 59.8 |
| GSM1344826 | 52.1 | 50.2 | 54.8 | 63.8 |
| GSM1344827 | 49.9 | 50.2 | 48.0 | 56.0 |
| GSM1344828 | 49.2 | 49.6 | 51.7 | 57.8 |
| GSM1344829 | 36.2 | 41.3 | 37.6 | 50.0 |
| GSM1344830 | 47.1 | 49.5 | 45.3 | 52.8 |
| GSM1344831 | 73.8 | 58.6 | 60.9 | 67.1 |
| GSM1344832 | 51.6 | 52.6 | 50.0 | 57.3 |
| GSM1344833 | 59.0 | 63.2 | 63.5 | 64.4 |
| GSM1344834 | 45.1 | 44.1 | 44.4 | 52.3 |
| GSM1344835 | 41.0 | 41.4 | 44.0 | 48.7 |
| GSM1344836 | 41.6 | 43.7 | 45.7 | 49.4 |
| GSM1344837 | 51.0 | 53.1 | 58.1 | 61.4 |
| GSM1344838 | 39.9 | 42.7 | 43.4 | 44.9 |
| GSM1344839 | 36.9 | 35.7 | 37.3 | 41.8 |
| GSM1344840 | 66.5 | 62.0 | 61.6 | 70.1 |
| GSM1344841 | 38.4 | 41.2 | 39.5 | 46.7 |
| GSM1344842 | 48.2 | 52.7 | 48.1 | 54.2 |
| GSM1344843 | 43.4 | 47.8 | 44.6 | 52.6 |
| GSM1344844 | 40.9 | 45.2 | 47.2 | 51.4 |
| GSM1344845 | 51.0 | 55.8 | 52.4 | 57.2 |
| GSM1344846 | 71.0 | 71.7 | 71.6 | 79.0 |
| GSM1344847 | 51.3 | 48.7 | 49.8 | 62.5 |
| GSM1344848 | 48.3 | 59.0 | 54.8 | 63.3 |
| GSM1344849 | 62.0 | 66.3 | 63.7 | 68.4 |
| GSM1344850 | 35.2 | 38.2 | 35.3 | 44.5 |
| GSM1344851 | 50.8 | 53.9 | 58.6 | 61.0 |
| GSM1344852 | 50.6 | 52.6 | 52.2 | 63.1 |
| GSM1344853 | 70.3 | 65.8 | 66.9 | 70.1 |
| GSM1344854 | 61.5 | 55.1 | 62.4 | 66.7 |
| GSM1344855 | 55.2 | 54.2 | 54.4 | 66.1 |
| GSM1344856 | 65.6 | 61.9 | 60.5 | 67.4 |
| GSM1344857 | 58.7 | 53.5 | 54.5 | 63.4 |
| GSM1344858 | 69.5 | 62.7 | 60.6 | 68.1 |
| GSM1344859 | 48.0 | 45.1 | 50.8 | 53.9 |
| GSM1344860 | 38.6 | 35.7 | 39.4 | 43.4 |
| GSM1344861 | 46.9 | 43.2 | 47.9 | 53.8 |
| GSM1344862 | 47.6 | 51.2 | 50.6 | 53.4 |
| GSM1344863 | 43.4 | 46.6 | 43.3 | 53.0 |
| GSM1344864 | 58.3 | 60.4 | 63.7 | 74.9 |
| GSM1344865 | 50.2 | 48.6 | 61.6 | 57.5 |
| GSM1344866 | 59.5 | 59.9 | 59.6 | 62.4 |
| GSM1344867 | 47.3 | 51.1 | 47.4 | 62.1 |
| GSM1344868 | 41.3 | 46.2 | 50.7 | 56.9 |
| GSM1344869 | 54.0 | 52.7 | 47.2 | 56.3 |
| GSM1344870 | 52.0 | 55.0 | 55.6 | 60.1 |
| GSM1344871 | 65.0 | 70.1 | 72.1 | 74.4 |
| GSM1344872 | 59.2 | 61.0 | 56.1 | 63.2 |
| GSM1344873 | 47.4 | 43.0 | 49.1 | 47.8 |
| GSM1344874 | 49.5 | 51.3 | 55.5 | 61.3 |
| GSM1344875 | 47.6 | 55.5 | 63.7 | 57.9 |
| GSM1344876 | 55.5 | 68.5 | 61.9 | 71.9 |
| GSM1344877 | 35.5 | 38.4 | 40.2 | 46.2 |
| GSM1344878 | 39.6 | 41.5 | 44.3 | 48.5 |
| GSM1344879 | 49.9 | 46.1 | 44.8 | 54.1 |
| GSM1344880 | 61.1 | 51.6 | 54.1 | 56.5 |

|            |      |      |      |      |
|------------|------|------|------|------|
| GSM1344881 | 64.7 | 71.1 | 72.8 | 75.1 |
| GSM1344882 | 51.3 | 53.0 | 59.7 | 55.9 |
| GSM1344883 | 64.1 | 60.2 | 65.1 | 70.7 |
| GSM1344884 | 35.1 | 33.7 | 34.8 | 45.3 |
| GSM1344885 | 44.4 | 47.4 | 50.3 | 57.5 |
| GSM1344886 | 44.8 | 46.9 | 48.5 | 54.1 |
| GSM1344887 | 62.1 | 55.2 | 57.0 | 59.0 |
| GSM1344888 | 74.4 | 69.6 | 68.1 | 73.3 |
| GSM1344889 | 35.7 | 38.4 | 43.6 | 45.0 |
| GSM1344890 | 53.3 | 53.7 | 51.8 | 60.8 |
| GSM1344891 | 52.3 | 55.1 | 57.7 | 62.6 |
| GSM1344892 | 61.9 | 61.1 | 60.5 | 73.5 |
| GSM1344893 | 74.1 | 70.1 | 70.6 | 71.0 |
| GSM1344894 | 56.3 | 55.3 | 55.3 | 61.5 |
| GSM1344895 | 50.2 | 49.4 | 56.6 | 51.9 |
| GSM1344896 | 37.2 | 41.8 | 45.5 | 48.3 |
| GSM1344897 | 37.1 | 39.2 | 44.7 | 49.9 |
| GSM1344898 | 38.4 | 37.4 | 43.4 | 44.9 |
| GSM1344899 | 39.5 | 46.5 | 48.8 | 46.9 |
| GSM1344900 | 39.8 | 40.1 | 44.6 | 46.0 |
| GSM1344901 | 46.4 | 49.7 | 46.5 | 56.7 |
| GSM1344902 | 63.1 | 70.0 | 64.8 | 69.6 |
| GSM1344903 | 42.3 | 38.2 | 33.8 | 44.0 |
| GSM1344904 | 48.4 | 49.7 | 47.2 | 58.2 |
| GSM1344905 | 54.7 | 53.8 | 58.3 | 65.1 |
| GSM1344906 | 73.2 | 75.4 | 73.7 | 80.4 |
| GSM1344907 | 62.4 | 66.6 | 65.6 | 73.4 |
| GSM1344908 | 49.0 | 49.0 | 52.5 | 57.0 |
| GSM1344909 | 48.1 | 52.5 | 53.6 | 62.6 |
| GSM1344910 | 56.3 | 53.4 | 56.9 | 66.0 |
| GSM1344911 | 69.1 | 64.9 | 65.2 | 75.6 |
| GSM1344912 | 38.7 | 37.2 | 44.1 | 48.7 |
| GSM1344913 | 46.6 | 43.0 | 43.0 | 54.5 |
| GSM1344914 | 55.1 | 56.9 | 61.7 | 62.1 |
| GSM1344915 | 69.4 | 63.2 | 64.6 | 71.9 |
| GSM1344916 | 56.9 | 55.1 | 58.6 | 61.3 |
| GSM1344917 | 56.8 | 52.2 | 53.9 | 63.0 |
| GSM1344918 | 48.1 | 48.8 | 47.8 | 55.3 |
| GSM1344919 | 50.9 | 51.1 | 54.5 | 56.4 |
| GSM1344920 | 45.6 | 47.3 | 48.5 | 54.5 |
| GSM1344921 | 54.1 | 57.8 | 57.2 | 63.0 |
| GSM1344922 | 58.4 | 63.2 | 64.1 | 68.0 |
| GSM1344923 | 60.6 | 58.7 | 65.7 | 62.8 |
| GSM1344924 | 62.4 | 66.8 | 60.9 | 68.6 |
| GSM1344925 | 48.3 | 44.7 | 53.9 | 53.5 |
| GSM1344926 | 37.4 | 41.3 | 49.5 | 52.3 |
| GSM1344927 | 50.0 | 47.4 | 50.9 | 58.5 |
| GSM1344928 | 44.7 | 46.4 | 46.7 | 54.9 |
| GSM1344929 | 50.6 | 51.5 | 50.2 | 54.1 |
| GSM1344930 | 64.9 | 63.2 | 67.7 | 71.0 |
| GSM1344931 | 43.6 | 46.5 | 50.2 | 52.6 |
| GSM1344932 | 51.7 | 50.0 | 50.2 | 60.7 |
| GSM1344933 | 35.1 | 35.6 | 36.4 | 45.7 |
| GSM1344934 | 63.6 | 64.0 | 61.7 | 65.1 |
| GSM1344935 | 49.8 | 48.1 | 47.8 | 56.6 |
| GSM1344936 | 53.9 | 47.6 | 50.0 | 51.4 |

|            |      |      |      |      |
|------------|------|------|------|------|
| GSM1344937 | 72.1 | 58.6 | 63.2 | 66.3 |
| GSM1344938 | 61.6 | 67.4 | 60.2 | 68.6 |
| GSM1344939 | 45.5 | 48.8 | 49.8 | 55.5 |
| GSM1344940 | 49.5 | 51.7 | 53.2 | 57.4 |
| GSM1344941 | 43.4 | 42.6 | 45.7 | 53.3 |
| GSM1344942 | 42.3 | 43.9 | 47.6 | 50.0 |
| GSM1344943 | 49.4 | 50.5 | 60.1 | 59.5 |
| GSM1344944 | 41.5 | 46.6 | 44.5 | 51.4 |
| GSM1344945 | 62.5 | 58.5 | 58.4 | 62.0 |
| GSM1344946 | 44.9 | 49.5 | 53.7 | 51.1 |
| GSM1344947 | 40.2 | 39.4 | 43.1 | 50.3 |
| GSM1344948 | 41.6 | 48.7 | 53.0 | 62.5 |
| GSM1344949 | 57.6 | 59.0 | 55.1 | 61.4 |
| GSM1344950 | 43.2 | 45.2 | 46.6 | 56.0 |
| GSM1344951 | 58.1 | 64.2 | 59.4 | 63.3 |
| GSM1344952 | 48.5 | 48.7 | 50.1 | 57.5 |
| GSM1344953 | 46.0 | 44.8 | 51.1 | 50.4 |
| GSM1344954 | 49.3 | 46.2 | 45.5 | 52.3 |
| GSM1344955 | 41.3 | 39.5 | 45.0 | 43.7 |
| GSM1344956 | 58.9 | 56.5 | 59.6 | 71.1 |
| GSM1344957 | 40.0 | 38.2 | 43.5 | 47.9 |
| GSM1344958 | 53.4 | 55.1 | 59.0 | 63.3 |
| GSM1344959 | 48.2 | 51.2 | 48.3 | 60.4 |
| GSM1344960 | 53.7 | 65.0 | 64.0 | 68.1 |
| GSM1344961 | 52.9 | 51.3 | 49.2 | 58.5 |
| GSM1344962 | 45.0 | 47.6 | 45.4 | 53.2 |
| GSM1344963 | 64.5 | 54.6 | 56.9 | 61.5 |
| GSM1344964 | 38.9 | 41.8 | 47.5 | 50.0 |
| GSM1344965 | 51.8 | 46.2 | 47.1 | 55.0 |
| GSM1344966 | 55.5 | 52.6 | 56.9 | 59.4 |
| GSM1344967 | 46.2 | 45.7 | 45.7 | 51.8 |
| GSM1344968 | 69.7 | 62.5 | 67.9 | 68.2 |
| GSM1344969 | 50.3 | 50.9 | 50.5 | 58.6 |
| GSM1344970 | 48.7 | 50.1 | 53.2 | 55.3 |
| GSM1344971 | 36.7 | 41.0 | 39.9 | 49.9 |
| GSM1344972 | 70.8 | 66.1 | 62.8 | 72.5 |
| GSM1344973 | 61.5 | 64.2 | 62.5 | 73.7 |
| GSM1344974 | 35.3 | 60.2 | 67.4 | 69.5 |
| GSM1344975 | 46.9 | 48.7 | 51.0 | 56.5 |
| GSM1344976 | 47.2 | 51.9 | 51.2 | 55.2 |
| GSM1344977 | 35.2 | 37.6 | 39.8 | 42.8 |
| GSM1344978 | 35.2 | 41.6 | 42.7 | 45.7 |
| GSM1344979 | 50.0 | 50.1 | 54.0 | 59.6 |
| GSM1344980 | 42.2 | 44.2 | 51.2 | 54.7 |
| GSM1344981 | 52.3 | 49.5 | 49.3 | 58.2 |
| GSM1344982 | 54.6 | 55.4 | 56.5 | 61.6 |
| GSM1344983 | 55.2 | 58.7 | 58.9 | 65.6 |
| GSM1344984 | 55.3 | 50.5 | 57.7 | 57.9 |
| GSM1344985 | 44.4 | 50.4 | 54.6 | 58.2 |
| GSM1344986 | 55.2 | 56.5 | 55.5 | 65.7 |
| GSM1344987 | 74.6 | 74.0 | 65.5 | 73.4 |
| GSM1344988 | 43.8 | 45.3 | 43.9 | 55.1 |
| GSM1344989 | 53.8 | 55.8 | 55.7 | 61.1 |
| GSM1344990 | 55.1 | 59.3 | 56.7 | 60.6 |
| GSM1344991 | 62.7 | 65.7 | 62.0 | 69.9 |
| GSM1344992 | 46.5 | 47.7 | 44.2 | 50.4 |

|            |      |      |      |      |
|------------|------|------|------|------|
| GSM1344993 | 49.0 | 56.3 | 53.7 | 59.7 |
| GSM1344994 | 48.6 | 56.1 | 60.9 | 65.0 |
| GSM1344995 | 43.0 | 48.9 | 49.7 | 59.7 |
| GSM1344996 | 47.6 | 47.2 | 48.4 | 52.2 |
| GSM1344997 | 50.8 | 49.0 | 51.2 | 56.4 |
| GSM1344998 | 56.1 | 54.2 | 54.9 | 62.3 |
| GSM1344999 | 43.1 | 42.2 | 44.6 | 47.6 |
| GSM1345000 | 44.8 | 48.5 | 48.9 | 55.3 |
| GSM1345001 | 52.2 | 52.5 | 52.6 | 57.6 |
| GSM1345002 | 63.3 | 68.1 | 65.6 | 72.5 |
| GSM1345003 | 63.9 | 61.2 | 60.5 | 61.3 |
| GSM1345004 | 52.7 | 52.1 | 53.2 | 58.1 |
| GSM1345005 | 42.9 | 40.4 | 42.5 | 53.2 |
| GSM1345006 | 63.2 | 60.4 | 58.8 | 68.1 |
| GSM1345007 | 43.3 | 48.1 | 53.5 | 50.9 |
| GSM1345008 | 50.6 | 57.1 | 57.4 | 62.3 |
| GSM1345009 | 38.5 | 38.9 | 47.4 | 49.2 |
| GSM1345010 | 48.8 | 49.8 | 50.6 | 54.5 |
| GSM1345011 | 54.4 | 52.6 | 51.1 | 63.1 |
| GSM1345012 | 41.9 | 48.4 | 48.8 | 55.6 |
| GSM1345013 | 63.1 | 66.5 | 66.8 | 69.2 |
| GSM1345014 | 47.3 | 50.0 | 51.6 | 58.1 |
| GSM1345015 | 42.0 | 43.8 | 38.8 | 51.5 |
| GSM1345016 | 41.2 | 46.9 | 44.1 | 54.9 |
| GSM1345017 | 51.6 | 51.1 | 55.1 | 57.9 |
| GSM1345018 | 55.5 | 49.2 | 48.6 | 57.7 |
| GSM1345019 | 35.4 | 37.2 | 39.8 | 44.4 |
| GSM1345020 | 54.2 | 49.1 | 52.2 | 56.8 |
| GSM1345021 | 39.8 | 35.2 | 39.5 | 49.0 |
| GSM1345022 | 48.7 | 53.3 | 54.7 | 55.7 |
| GSM1345023 | 62.6 | 62.3 | 59.9 | 68.4 |
| GSM1345024 | 53.5 | 48.3 | 48.1 | 55.4 |
| GSM1345025 | 45.5 | 47.5 | 48.9 | 54.0 |
| GSM1345026 | 46.1 | 50.3 | 50.7 | 57.5 |
| GSM1345027 | 47.9 | 49.2 | 41.3 | 51.4 |
| GSM1345028 | 35.2 | 37.3 | 36.4 | 43.9 |
| GSM1345029 | 48.9 | 53.4 | 58.2 | 60.3 |
| GSM1345030 | 38.5 | 46.7 | 46.7 | 54.6 |
| GSM1345031 | 65.8 | 68.0 | 69.2 | 72.5 |
| GSM1345032 | 52.6 | 53.0 | 54.6 | 56.3 |
| GSM1345033 | 48.0 | 47.4 | 44.7 | 53.3 |
| GSM1345034 | 50.9 | 50.4 | 54.4 | 57.1 |
| GSM1345035 | 72.9 | 71.9 | 68.1 | 78.1 |
| GSM1345036 | 72.7 | 67.5 | 63.1 | 71.7 |
| GSM1345037 | 40.4 | 45.2 | 47.6 | 48.3 |
| GSM1345038 | 58.4 | 57.0 | 57.6 | 62.7 |
| GSM1345039 | 40.3 | 38.3 | 42.4 | 51.0 |
| GSM1345040 | 60.6 | 59.3 | 58.2 | 72.9 |
| GSM1345041 | 54.5 | 52.5 | 56.3 | 61.9 |
| GSM1345042 | 50.4 | 51.9 | 54.4 | 55.4 |
| GSM1345043 | 39.1 | 37.7 | 41.7 | 45.6 |
| GSM1345044 | 43.5 | 43.7 | 50.2 | 54.8 |
| GSM1345045 | 44.9 | 49.1 | 51.6 | 56.3 |
| GSM1345046 | 39.4 | 38.6 | 40.0 | 46.6 |
| GSM1345047 | 47.7 | 44.8 | 45.1 | 46.9 |
| GSM1345048 | 50.7 | 49.3 | 50.0 | 55.2 |



|            |      |      |      |      |
|------------|------|------|------|------|
| GSM1345049 | 46.9 | 46.3 | 52.9 | 55.4 |
| GSM1345050 | 51.0 | 46.1 | 48.8 | 56.6 |
| GSM1345051 | 52.9 | 50.4 | 60.1 | 56.2 |
| GSM1345052 | 50.8 | 57.3 | 57.9 | 63.2 |
| GSM1345053 | 44.9 | 42.6 | 46.0 | 50.6 |
| GSM1345054 | 57.9 | 61.2 | 60.7 | 66.6 |
| GSM1345055 | 45.1 | 46.9 | 49.7 | 55.9 |
| GSM1345056 | 56.0 | 54.8 | 61.5 | 63.1 |
| GSM1345057 | 45.3 | 45.5 | 48.4 | 52.8 |
| GSM1345058 | 38.2 | 42.3 | 45.1 | 55.7 |
| GSM1345059 | 69.5 | 70.7 | 61.9 | 72.6 |
| GSM1345060 | 53.4 | 51.5 | 48.1 | 56.7 |
| GSM1345061 | 59.0 | 54.6 | 53.2 | 60.3 |
| GSM1345062 | 41.5 | 40.4 | 43.3 | 48.3 |
| GSM1345063 | 66.6 | 62.4 | 65.7 | 68.6 |
| GSM1345064 | 35.4 | 40.5 | 42.8 | 49.6 |
| GSM1345065 | 52.5 | 56.3 | 52.6 | 60.8 |
| GSM1345066 | 35.1 | 35.8 | 41.3 | 45.7 |
| GSM1345067 | 38.8 | 39.3 | 46.0 | 46.7 |
| GSM1345068 | 73.0 | 61.9 | 66.0 | 66.9 |
| GSM1345069 | 48.3 | 54.4 | 61.4 | 62.7 |
| GSM1345070 | 42.1 | 42.5 | 48.3 | 51.9 |
| GSM1345071 | 49.8 | 38.7 | 36.9 | 51.7 |
| GSM1345072 | 42.5 | 49.6 | 58.8 | 60.2 |
| GSM1345073 | 35.5 | 39.6 | 42.9 | 49.0 |
| GSM1345074 | 35.5 | 36.7 | 39.6 | 38.5 |
| GSM1345075 | 41.0 | 45.5 | 46.9 | 51.2 |
| GSM1345076 | 42.5 | 47.2 | 50.2 | 51.0 |
| GSM1345077 | 45.1 | 41.8 | 49.8 | 53.2 |
| GSM1345078 | 39.0 | 44.6 | 45.8 | 49.0 |
| GSM1345079 | 49.4 | 50.8 | 51.7 | 60.4 |
| GSM1345080 | 45.1 | 49.4 | 52.4 | 57.1 |
| GSM1345081 | 71.5 | 76.9 | 69.5 | 78.2 |
| GSM1345082 | 47.4 | 49.2 | 48.5 | 54.0 |
| GSM1345083 | 49.8 | 54.6 | 48.7 | 59.8 |
| GSM1345084 | 42.9 | 51.5 | 43.1 | 52.5 |
| GSM1345085 | 51.2 | 59.8 | 54.5 | 66.3 |
| GSM1345086 | 48.2 | 49.5 | 47.3 | 54.1 |
| GSM1345087 | 38.3 | 42.8 | 44.1 | 45.8 |
| GSM1345088 | 35.3 | 43.9 | 40.3 | 50.7 |
| GSM1345089 | 51.2 | 51.3 | 55.8 | 59.4 |
| GSM1345090 | 35.1 | 38.3 | 41.4 | 45.2 |
| GSM1345091 | 50.5 | 47.3 | 49.0 | 55.1 |
| GSM1345092 | 55.1 | 56.0 | 56.4 | 62.3 |
| GSM1345093 | 58.5 | 55.5 | 64.1 | 67.1 |
| GSM1345094 | 57.8 | 53.1 | 56.4 | 61.0 |
| GSM1345095 | 72.6 | 66.0 | 65.0 | 72.8 |
| GSM1345096 | 50.9 | 49.5 | 50.1 | 59.4 |
| GSM1345097 | 73.5 | 77.1 | 79.1 | 82.2 |
| GSM1345098 | 50.3 | 50.4 | 59.7 | 64.6 |
| GSM1345099 | 64.6 | 63.5 | 58.5 | 70.5 |
| GSM1345100 | 51.7 | 52.7 | 58.6 | 58.8 |
| GSM1345101 | 41.7 | 40.4 | 44.6 | 50.9 |
| GSM1345102 | 68.2 | 63.9 | 66.3 | 67.2 |
| GSM1345103 | 49.6 | 50.0 | 50.0 | 56.7 |
| GSM1345104 | 48.0 | 45.7 | 50.7 | 57.5 |

|            |      |      |      |      |
|------------|------|------|------|------|
| GSM1345105 | 55.3 | 63.6 | 60.2 | 70.8 |
| GSM1345106 | 54.5 | 57.6 | 56.0 | 64.6 |
| GSM1345107 | 55.9 | 57.7 | 56.8 | 66.5 |
| GSM1345108 | 51.8 | 52.6 | 50.6 | 55.9 |
| GSM1345109 | 55.2 | 60.7 | 57.1 | 68.5 |
| GSM1345110 | 53.5 | 53.1 | 55.7 | 55.8 |
| GSM1345111 | 55.3 | 57.9 | 51.1 | 62.9 |
| GSM1345112 | 51.5 | 52.1 | 55.8 | 60.4 |
| GSM1345113 | 58.9 | 58.3 | 54.5 | 63.2 |
| GSM1345114 | 68.5 | 71.1 | 66.6 | 74.5 |
| GSM1345115 | 40.0 | 42.2 | 44.2 | 50.6 |
| GSM1345116 | 43.2 | 43.6 | 42.3 | 55.4 |
| GSM1345117 | 35.9 | 33.6 | 37.5 | 44.2 |
| GSM1345118 | 62.7 | 51.6 | 57.2 | 67.4 |
| GSM1345119 | 42.7 | 44.2 | 45.6 | 52.3 |
| GSM1345120 | 62.3 | 57.8 | 59.6 | 67.9 |
| GSM1345121 | 49.3 | 53.6 | 47.6 | 58.7 |
| GSM1345122 | 50.6 | 54.2 | 49.8 | 59.4 |
| GSM1345123 | 53.1 | 52.6 | 55.7 | 54.9 |
| GSM1345124 | 72.7 | 73.4 | 72.8 | 81.2 |
| GSM1345125 | 35.3 | 30.5 | 37.7 | 43.4 |
| GSM1345126 | 37.3 | 31.8 | 37.3 | 40.7 |
| GSM1345127 | 42.4 | 45.5 | 46.2 | 56.2 |
| GSM1345128 | 38.1 | 38.8 | 45.1 | 46.0 |
| GSM1345129 | 43.3 | 45.6 | 53.7 | 54.2 |
| GSM1345130 | 39.2 | 40.3 | 43.0 | 46.8 |
| GSM1345131 | 48.0 | 46.2 | 44.7 | 55.9 |
| GSM1345132 | 43.9 | 39.8 | 44.9 | 47.3 |
| GSM1345133 | 48.2 | 44.9 | 45.9 | 53.9 |
| GSM1345134 | 45.4 | 47.5 | 46.5 | 53.8 |
| GSM1345135 | 48.0 | 49.4 | 54.4 | 58.6 |
| GSM1345136 | 50.9 | 57.1 | 57.2 | 63.0 |
| GSM1345137 | 36.9 | 40.9 | 42.4 | 45.2 |
| GSM1345138 | 68.9 | 69.8 | 67.0 | 73.1 |
| GSM1345139 | 52.4 | 43.6 | 42.9 | 53.2 |
| GSM1345140 | 61.1 | 53.5 | 57.9 | 62.3 |
| GSM1345141 | 64.4 | 68.3 | 72.0 | 71.9 |
| GSM1345142 | 50.4 | 50.8 | 48.4 | 59.4 |
| GSM1345143 | 62.1 | 64.3 | 65.4 | 66.5 |
| GSM1345144 | 66.0 | 65.7 | 68.1 | 71.5 |
| GSM1345145 | 56.4 | 61.4 | 63.3 | 67.2 |
| GSM1345146 | 74.8 | 68.5 | 72.5 | 69.5 |
| GSM1345147 | 71.7 | 67.9 | 65.0 | 72.2 |
| GSM1345148 | 67.3 | 41.4 | 42.2 | 50.1 |
| GSM1345149 | 40.2 | 39.7 | 39.5 | 47.1 |
| GSM1345150 | 36.6 | 34.5 | 34.0 | 44.0 |
| GSM1345151 | 54.1 | 50.4 | 59.7 | 56.9 |
| GSM1345152 | 41.2 | 40.8 | 43.0 | 53.5 |
| GSM1345153 | 61.9 | 62.1 | 71.4 | 69.5 |
| GSM1345154 | 55.8 | 58.2 | 59.2 | 63.0 |
| GSM1345155 | 65.0 | 70.6 | 78.3 | 79.4 |
| GSM1345156 | 55.1 | 61.8 | 62.8 | 63.9 |
| GSM1345157 | 49.4 | 50.0 | 56.3 | 54.2 |
| GSM1345158 | 59.7 | 56.2 | 59.2 | 58.4 |
| GSM1345159 | 41.7 | 42.0 | 45.0 | 55.1 |
| GSM1345160 | 47.0 | 50.1 | 49.7 | 54.1 |

|            |      |      |      |      |
|------------|------|------|------|------|
| GSM1345161 | 70.8 | 71.2 | 69.1 | 71.3 |
| GSM1345162 | 61.7 | 65.5 | 60.3 | 66.7 |
| GSM1345163 | 35.1 | 34.2 | 42.7 | 44.2 |
| GSM1345164 | 41.5 | 39.9 | 46.5 | 50.2 |
| GSM1345165 | 58.0 | 59.5 | 59.7 | 69.2 |
| GSM1345166 | 46.6 | 51.0 | 46.4 | 59.8 |
| GSM1345167 | 58.5 | 59.1 | 60.4 | 65.3 |
| GSM1345168 | 43.5 | 48.6 | 50.8 | 58.6 |
| GSM1345169 | 37.1 | 37.1 | 44.0 | 46.9 |
| GSM1345170 | 48.6 | 51.8 | 48.8 | 53.6 |
| GSM1345171 | 35.1 | 42.1 | 47.7 | 50.2 |
| GSM1345172 | 35.2 | 37.8 | 41.6 | 51.3 |
| GSM1345173 | 58.2 | 58.9 | 65.5 | 67.2 |
| GSM1345174 | 40.4 | 41.7 | 42.0 | 50.2 |
| GSM1345175 | 45.7 | 50.8 | 51.2 | 54.3 |
| GSM1345176 | 45.5 | 43.1 | 43.3 | 53.2 |
| GSM1345177 | 56.8 | 57.8 | 59.6 | 72.6 |
| GSM1345178 | 41.0 | 44.8 | 47.1 | 50.7 |
| GSM1345179 | 38.0 | 41.6 | 47.7 | 51.0 |
| GSM1345180 | 69.1 | 63.2 | 61.3 | 65.5 |
| GSM1345181 | 51.2 | 48.4 | 48.1 | 53.0 |
| GSM1345182 | 61.9 | 56.8 | 57.0 | 65.4 |
| GSM1345183 | 42.7 | 49.3 | 56.6 | 60.3 |
| GSM1345184 | 43.7 | 46.9 | 50.8 | 53.4 |
| GSM1345185 | 45.8 | 49.3 | 49.4 | 60.6 |
| GSM1345186 | 42.8 | 44.0 | 44.2 | 55.4 |
| GSM1345187 | 61.4 | 62.1 | 62.0 | 64.2 |
| GSM1345188 | 73.1 | 71.3 | 69.3 | 75.3 |
| GSM1345189 | 47.4 | 49.8 | 49.6 | 61.7 |
| GSM1345190 | 55.8 | 52.2 | 59.1 | 58.3 |
| GSM1345191 | 47.7 | 45.2 | 47.3 | 57.2 |
| GSM1345192 | 49.4 | 45.3 | 47.8 | 56.0 |
| GSM1345193 | 69.8 | 73.5 | 70.3 | 77.9 |
| GSM1345194 | 57.2 | 55.2 | 55.2 | 62.8 |
| GSM1345195 | 45.7 | 48.5 | 52.2 | 55.0 |
| GSM1345196 | 59.0 | 64.3 | 62.2 | 67.1 |
| GSM1345197 | 47.5 | 49.1 | 50.1 | 53.8 |
| GSM1345198 | 37.1 | 31.9 | 39.7 | 45.5 |
| GSM1345199 | 44.5 | 45.6 | 48.2 | 54.9 |
| GSM1345200 | 35.1 | 42.0 | 44.0 | 49.4 |
| GSM1345201 | 44.8 | 47.1 | 49.8 | 55.4 |
| GSM1345202 | 36.1 | 40.9 | 43.1 | 46.0 |
| GSM1345203 | 53.9 | 50.6 | 55.4 | 60.5 |
| GSM1345204 | 36.5 | 44.1 | 46.0 | 50.5 |
| GSM1345205 | 35.9 | 36.7 | 44.3 | 48.3 |
| GSM1345206 | 39.6 | 42.3 | 42.6 | 51.0 |
| GSM1345207 | 71.8 | 69.0 | 69.6 | 73.7 |
| GSM1345208 | 68.4 | 70.5 | 71.0 | 76.6 |
| GSM1345209 | 50.4 | 49.6 | 53.4 | 56.6 |
| GSM1345210 | 45.2 | 44.7 | 48.4 | 54.3 |
| GSM1345211 | 60.7 | 58.0 | 59.6 | 67.0 |
| GSM1345212 | 65.8 | 71.4 | 71.1 | 75.5 |
| GSM1345213 | 35.1 | 37.7 | 45.2 | 45.1 |
| GSM1345214 | 71.8 | 69.8 | 68.1 | 76.9 |
| GSM1345215 | 64.7 | 65.1 | 68.1 | 67.6 |
| GSM1345216 | 55.4 | 55.4 | 56.6 | 60.4 |

|            |      |      |      |      |
|------------|------|------|------|------|
| GSM1345217 | 48.9 | 48.3 | 46.0 | 52.9 |
| GSM1345218 | 53.5 | 52.4 | 48.3 | 61.5 |
| GSM1345219 | 42.8 | 45.7 | 43.1 | 52.6 |
| GSM1345220 | 56.0 | 58.1 | 59.1 | 64.1 |
| GSM1345221 | 45.9 | 48.8 | 50.7 | 52.8 |
| GSM1345222 | 40.1 | 47.8 | 50.2 | 50.7 |
| GSM1345223 | 41.4 | 43.9 | 44.0 | 55.2 |
| GSM1345224 | 35.3 | 39.3 | 37.6 | 46.5 |
| GSM1345225 | 38.1 | 43.8 | 43.5 | 48.8 |
| GSM1345226 | 46.3 | 47.1 | 48.8 | 53.7 |
| GSM1345227 | 57.3 | 53.3 | 62.8 | 60.3 |
| GSM1345228 | 39.9 | 37.1 | 39.5 | 43.5 |
| GSM1345229 | 51.8 | 49.8 | 51.3 | 58.3 |
| GSM1345230 | 36.7 | 34.5 | 44.6 | 45.5 |
| GSM1345231 | 38.6 | 37.4 | 40.0 | 44.3 |
| GSM1345232 | 50.5 | 48.9 | 51.6 | 57.3 |
| GSM1345233 | 56.7 | 56.9 | 52.6 | 61.2 |
| GSM1345234 | 44.1 | 46.0 | 50.3 | 55.5 |
| GSM1345235 | 37.1 | 38.3 | 42.6 | 47.8 |
| GSM1345236 | 39.6 | 39.2 | 39.5 | 43.1 |
| GSM1345237 | 45.4 | 49.8 | 53.6 | 55.1 |
| GSM1345238 | 59.1 | 60.0 | 64.2 | 63.3 |
| GSM1345239 | 50.2 | 46.6 | 51.2 | 53.8 |
| GSM1345240 | 59.4 | 62.4 | 62.1 | 67.9 |
| GSM1345241 | 48.6 | 53.7 | 60.5 | 67.3 |
| GSM1345242 | 38.9 | 37.0 | 42.0 | 45.2 |
| GSM1345243 | 56.7 | 51.9 | 54.8 | 60.9 |
| GSM1345244 | 61.1 | 59.3 | 56.4 | 65.1 |
| GSM1345245 | 39.0 | 41.5 | 40.5 | 51.1 |
| GSM1345246 | 50.1 | 49.2 | 51.3 | 57.3 |
| GSM1345247 | 53.5 | 50.3 | 54.4 | 60.8 |
| GSM1345248 | 71.3 | 65.4 | 68.1 | 78.9 |
| GSM1345249 | 53.6 | 50.2 | 52.7 | 58.4 |
| GSM1345250 | 64.4 | 64.6 | 63.3 | 68.5 |
| GSM1345251 | 69.2 | 62.9 | 66.1 | 67.1 |
| GSM1345252 | 39.0 | 36.9 | 45.4 | 45.9 |
| GSM1345253 | 57.7 | 56.2 | 62.4 | 64.1 |
| GSM1345254 | 47.1 | 47.8 | 48.1 | 52.4 |
| GSM1345255 | 35.1 | 38.3 | 39.3 | 45.0 |
| GSM1345256 | 50.0 | 55.0 | 56.6 | 62.6 |
| GSM1345257 | 47.6 | 52.6 | 56.8 | 60.4 |
| GSM1345258 | 43.5 | 42.6 | 47.6 | 53.3 |
| GSM1345259 | 53.2 | 56.1 | 54.6 | 64.0 |
| GSM1345260 | 41.9 | 39.7 | 44.0 | 48.5 |
| GSM1345261 | 41.1 | 39.2 | 46.6 | 53.0 |
| GSM1345262 | 56.9 | 61.2 | 62.9 | 71.8 |
| GSM1345263 | 51.6 | 56.2 | 59.8 | 64.2 |
| GSM1345264 | 46.2 | 48.9 | 54.4 | 56.5 |
| GSM1345265 | 53.0 | 54.8 | 55.8 | 58.1 |
| GSM1345266 | 57.3 | 55.3 | 57.7 | 65.5 |
| GSM1345267 | 70.9 | 67.1 | 70.8 | 79.4 |
| GSM1345268 | 67.3 | 63.5 | 67.2 | 69.5 |
| GSM1345269 | 68.8 | 65.1 | 60.7 | 67.4 |
| GSM1345270 | 47.7 | 41.4 | 45.0 | 52.1 |
| GSM1345271 | 52.1 | 50.0 | 58.5 | 58.6 |
| GSM1345272 | 61.3 | 60.6 | 58.6 | 64.6 |

|            |      |      |      |      |
|------------|------|------|------|------|
| GSM1345273 | 61.6 | 61.7 | 64.0 | 71.6 |
| GSM1345274 | 44.7 | 72.2 | 63.1 | 77.1 |
| GSM1345275 | 53.1 | 55.5 | 56.9 | 65.3 |
| GSM1345276 | 50.8 | 51.2 | 50.2 | 58.3 |
| GSM1345277 | 62.0 | 57.2 | 58.4 | 65.4 |
| GSM1345278 | 47.8 | 50.0 | 54.1 | 53.6 |
| GSM1345279 | 60.0 | 63.1 | 60.1 | 62.8 |
| GSM1345280 | 35.6 | 35.5 | 40.6 | 45.8 |
| GSM1345281 | 61.6 | 58.9 | 59.5 | 65.4 |
| GSM1345282 | 65.1 | 62.8 | 61.1 | 65.9 |
| GSM1345283 | 50.4 | 50.2 | 54.7 | 57.0 |
| GSM1345284 | 56.7 | 57.8 | 59.3 | 68.7 |
| GSM1345285 | 71.4 | 74.9 | 69.9 | 78.2 |
| GSM1345286 | 35.2 | 40.1 | 41.3 | 46.0 |
| GSM1345287 | 69.2 | 59.7 | 56.2 | 67.8 |
| GSM1345288 | 60.0 | 58.5 | 54.7 | 68.6 |
| GSM1345289 | 40.4 | 37.5 | 42.7 | 50.3 |
| GSM1345290 | 53.3 | 54.2 | 56.6 | 54.4 |
| GSM1345291 | 35.2 | 34.8 | 38.9 | 44.0 |
| GSM1345292 | 51.4 | 50.1 | 48.2 | 59.6 |
| GSM1345293 | 50.9 | 56.3 | 60.1 | 63.8 |
| GSM1345294 | 50.5 | 47.9 | 48.2 | 57.5 |
| GSM1345295 | 48.4 | 51.5 | 62.1 | 63.5 |
| GSM1345296 | 49.3 | 46.2 | 52.3 | 55.9 |
| GSM1345297 | 72.7 | 63.9 | 66.1 | 68.6 |
| GSM1345298 | 73.7 | 68.2 | 62.4 | 72.9 |
| GSM1345299 | 46.4 | 43.0 | 48.2 | 51.4 |
| GSM1345300 | 71.7 | 68.9 | 68.0 | 74.8 |
| GSM1345301 | 74.4 | 74.8 | 72.3 | 75.1 |
| GSM1345302 | 38.7 | 42.9 | 43.4 | 54.0 |
| GSM1345303 | 61.7 | 61.6 | 67.2 | 69.5 |
| GSM1345304 | 51.2 | 50.6 | 54.5 | 61.5 |
| GSM1345305 | 60.8 | 60.6 | 57.5 | 65.0 |
| GSM1345306 | 52.0 | 53.0 | 59.6 | 56.7 |
| GSM1345307 | 44.9 | 49.2 | 48.9 | 62.0 |
| GSM1345308 | 44.3 | 44.3 | 48.6 | 48.2 |
| GSM1345309 | 62.2 | 65.9 | 67.2 | 71.0 |
| GSM1345310 | 41.9 | 43.0 | 49.0 | 57.0 |
| GSM1345311 | 36.8 | 39.3 | 37.2 | 43.0 |
| GSM1345312 | 47.3 | 48.2 | 45.9 | 52.2 |
| GSM1345313 | 62.4 | 55.8 | 62.5 | 67.9 |
| GSM1345314 | 45.0 | 44.9 | 43.3 | 58.4 |
| GSM1345315 | 45.8 | 44.1 | 46.4 | 59.6 |
| GSM1345316 | 39.5 | 42.7 | 42.1 | 50.0 |
| GSM1345317 | 59.2 | 59.8 | 63.9 | 71.4 |
| GSM1345318 | 47.5 | 53.9 | 58.2 | 65.0 |
| GSM1345319 | 41.5 | 40.1 | 45.2 | 49.2 |
| GSM1345320 | 48.1 | 54.9 | 56.7 | 65.1 |
| GSM1345321 | 46.2 | 49.0 | 53.9 | 55.8 |
| GSM1345322 | 46.5 | 46.5 | 45.8 | 54.6 |
| GSM1345323 | 43.9 | 42.9 | 44.8 | 54.2 |
| GSM1345324 | 50.9 | 50.9 | 49.2 | 58.3 |
| GSM1345325 | 50.2 | 54.3 | 53.7 | 58.8 |
| GSM1345326 | 49.7 | 52.4 | 55.1 | 58.4 |
| GSM1345327 | 35.1 | 37.8 | 41.1 | 52.6 |
| GSM1345328 | 38.7 | 39.1 | 42.1 | 49.5 |

|            |      |      |      |      |
|------------|------|------|------|------|
| GSM1345329 | 40.6 | 38.2 | 41.2 | 49.1 |
| GSM1345330 | 44.9 | 43.4 | 46.2 | 53.4 |
| GSM1345331 | 51.4 | 48.0 | 47.7 | 57.1 |
| GSM1345332 | 50.3 | 50.7 | 50.2 | 58.0 |
| GSM1345333 | 50.8 | 50.3 | 50.7 | 57.0 |
| GSM1345334 | 44.9 | 44.8 | 49.8 | 51.6 |
| GSM1345335 | 54.2 | 57.1 | 56.4 | 62.6 |
| GSM1345336 | 36.2 | 34.3 | 42.5 | 42.3 |
| GSM1345337 | 38.6 | 39.3 | 47.5 | 48.5 |
| GSM1345338 | 45.2 | 44.1 | 42.6 | 46.2 |
| GSM1345339 | 57.6 | 55.6 | 54.2 | 63.9 |
| GSM1345340 | 59.7 | 56.1 | 56.6 | 62.3 |
| GSM1345341 | 51.0 | 51.2 | 49.8 | 57.4 |
| GSM1345342 | 59.6 | 59.3 | 60.0 | 67.4 |
| GSM1345343 | 60.1 | 61.1 | 57.4 | 63.5 |
| GSM1345344 | 55.9 | 55.7 | 56.4 | 62.8 |
| GSM1345345 | 50.8 | 51.8 | 52.7 | 58.7 |
| GSM1345346 | 49.4 | 49.2 | 48.3 | 58.9 |
| GSM1345347 | 54.7 | 54.4 | 53.4 | 60.4 |
| GSM1345348 | 50.4 | 57.0 | 55.6 | 71.4 |
| GSM1345349 | 43.9 | 49.3 | 48.4 | 57.3 |
| GSM1345350 | 46.7 | 48.9 | 49.0 | 58.0 |
| GSM1345351 | 65.4 | 71.5 | 67.7 | 78.8 |
| GSM1345352 | 51.2 | 57.7 | 61.2 | 64.2 |
| GSM1345353 | 37.7 | 37.7 | 38.6 | 42.5 |
| GSM1345354 | 39.5 | 43.0 | 45.1 | 55.2 |
| GSM1345355 | 45.5 | 55.3 | 54.0 | 62.8 |
| GSM1345356 | 66.5 | 67.4 | 72.8 | 74.8 |
| GSM1345357 | 50.0 | 48.9 | 51.5 | 54.6 |
| GSM1345358 | 41.2 | 46.5 | 50.2 | 55.0 |
| GSM1345359 | 47.9 | 48.4 | 49.0 | 58.4 |
| GSM1345360 | 42.0 | 41.0 | 43.9 | 51.4 |
| GSM1345361 | 48.9 | 50.1 | 54.1 | 55.9 |
| GSM1345362 | 55.1 | 54.3 | 50.9 | 60.3 |
| GSM1345363 | 56.9 | 53.0 | 57.4 | 62.4 |
| GSM1345364 | 43.5 | 44.3 | 44.1 | 51.2 |
| GSM1345365 | 43.5 | 41.9 | 40.7 | 49.3 |
| GSM1345366 | 35.5 | 36.2 | 36.6 | 41.7 |
| GSM1345367 | 44.0 | 50.6 | 53.5 | 58.6 |
| GSM1345368 | 51.5 | 48.0 | 53.1 | 55.8 |
| GSM1345369 | 40.6 | 46.1 | 48.0 | 58.4 |
| GSM1345370 | 45.7 | 52.0 | 45.7 | 58.2 |
| GSM1345371 | 55.5 | 54.1 | 60.6 | 62.4 |
| GSM1345372 | 55.2 | 48.4 | 50.2 | 54.8 |
| GSM1345373 | 35.2 | 33.5 | 37.5 | 43.2 |
| GSM1345374 | 74.1 | 76.6 | 75.4 | 83.2 |
| GSM1345375 | 49.4 | 51.6 | 48.5 | 53.3 |
| GSM1345376 | 66.6 | 71.9 | 72.6 | 77.8 |
| GSM1345377 | 57.2 | 51.8 | 53.6 | 58.8 |
| GSM1345378 | 47.0 | 51.1 | 54.4 | 62.2 |
| GSM1345379 | 56.3 | 58.7 | 58.0 | 64.6 |
| GSM1345380 | 47.0 | 49.3 | 48.7 | 57.9 |
| GSM1345381 | 71.9 | 68.5 | 68.1 | 81.0 |
| GSM1345382 | 51.5 | 52.2 | 47.5 | 54.4 |
| GSM1345383 | 45.4 | 44.4 | 42.4 | 47.9 |
| GSM1345384 | 64.9 | 68.0 | 66.1 | 73.0 |

|            |      |      |      |      |
|------------|------|------|------|------|
| GSM1345385 | 40.3 | 43.8 | 44.6 | 47.8 |
| GSM1345386 | 65.7 | 63.3 | 63.4 | 71.7 |
| GSM1345387 | 35.4 | 34.4 | 33.4 | 42.5 |
| GSM1345388 | 46.2 | 43.8 | 44.5 | 54.8 |
| GSM1345389 | 47.9 | 51.6 | 52.4 | 55.4 |
| GSM1345390 | 49.4 | 42.3 | 48.2 | 50.9 |
| GSM1345391 | 44.9 | 45.7 | 45.2 | 52.3 |
| GSM1345392 | 38.2 | 45.3 | 51.8 | 49.8 |
| GSM1345393 | 54.6 | 55.9 | 53.4 | 61.9 |
| GSM1345394 | 43.3 | 42.2 | 43.8 | 52.9 |
| GSM1345395 | 36.1 | 43.0 | 38.8 | 48.4 |
| GSM1345396 | 41.4 | 36.3 | 36.2 | 46.4 |
| GSM1345397 | 72.2 | 78.8 | 74.8 | 79.8 |
| GSM1345398 | 35.3 | 33.4 | 34.4 | 47.4 |
| GSM1345399 | 63.9 | 62.9 | 59.3 | 68.9 |
| GSM1345400 | 53.3 | 52.7 | 53.7 | 65.3 |
| GSM1345401 | 35.9 | 33.8 | 36.5 | 39.2 |
| GSM1345402 | 43.4 | 43.1 | 45.3 | 54.7 |
| GSM1345403 | 42.3 | 47.3 | 48.7 | 54.6 |
| GSM1345404 | 46.1 | 48.0 | 45.9 | 58.3 |
| GSM1345405 | 50.2 | 54.8 | 54.2 | 59.5 |
| GSM1345406 | 48.7 | 52.1 | 51.1 | 55.3 |
| GSM1345407 | 66.0 | 58.8 | 56.1 | 66.1 |
| GSM1345408 | 39.8 | 35.3 | 34.6 | 45.4 |
| GSM1345409 | 54.8 | 54.5 | 57.1 | 63.2 |
| GSM1345410 | 35.2 | 38.0 | 48.1 | 50.2 |
| GSM1345411 | 47.8 | 44.6 | 53.7 | 52.4 |
| GSM1345412 | 42.2 | 41.6 | 45.1 | 46.6 |
| GSM1345413 | 39.0 | 38.1 | 47.8 | 47.8 |
| GSM1345414 | 52.1 | 57.8 | 61.1 | 59.9 |
| GSM1345415 | 45.8 | 44.4 | 47.0 | 55.3 |
| GSM1345416 | 64.6 | 73.8 | 65.1 | 72.5 |
| GSM1345417 | 53.9 | 56.3 | 59.3 | 68.4 |
| GSM1345418 | 68.5 | 61.5 | 63.7 | 70.4 |
| GSM1345419 | 69.5 | 76.4 | 69.3 | 77.9 |
| GSM1345420 | 69.3 | 70.1 | 65.2 | 78.3 |
| GSM1345421 | 63.9 | 53.3 | 58.4 | 59.5 |
| GSM1345422 | 41.4 | 42.4 | 46.3 | 52.2 |
| GSM1345423 | 65.0 | 64.3 | 62.8 | 68.0 |
| GSM1345424 | 56.3 | 58.2 | 58.2 | 61.2 |
| GSM1345425 | 74.0 | 74.6 | 60.0 | 65.5 |
| GSM1345426 | 63.7 | 62.6 | 60.0 | 67.2 |
| GSM1345427 | 47.6 | 49.2 | 49.1 | 55.3 |
| GSM1345428 | 47.5 | 48.5 | 53.5 | 55.3 |
| GSM1345429 | 68.6 | 63.5 | 57.0 | 72.3 |
| GSM1345430 | 46.1 | 47.2 | 51.0 | 59.4 |
| GSM1345431 | 45.9 | 47.7 | 49.7 | 57.6 |
| GSM1345432 | 56.5 | 56.3 | 59.3 | 63.5 |
| GSM1345433 | 63.9 | 66.8 | 64.0 | 75.6 |
| GSM1345434 | 43.2 | 43.9 | 40.1 | 53.2 |
| GSM1345435 | 57.5 | 53.1 | 57.1 | 59.3 |
| GSM1345436 | 37.8 | 40.0 | 43.1 | 47.1 |
| GSM1345437 | 46.7 | 45.3 | 45.2 | 57.7 |
| GSM1345438 | 54.5 | 59.9 | 57.7 | 65.7 |
| GSM1345439 | 37.0 | 39.2 | 39.9 | 45.9 |
| GSM1345440 | 55.3 | 55.4 | 57.8 | 62.0 |

|            |      |      |      |      |
|------------|------|------|------|------|
| GSM1345441 | 44.8 | 43.1 | 49.2 | 59.4 |
| GSM1345442 | 51.9 | 54.6 | 54.6 | 61.1 |
| GSM1345443 | 57.3 | 53.7 | 56.0 | 66.1 |
| GSM1345444 | 50.3 | 58.6 | 58.5 | 62.9 |
| GSM1345445 | 42.7 | 45.7 | 46.5 | 52.7 |
| GSM1345446 | 46.2 | 46.9 | 54.6 | 55.5 |
| GSM1345447 | 56.3 | 58.8 | 59.4 | 62.3 |
| GSM1345448 | 54.2 | 50.8 | 54.6 | 56.9 |
| GSM1345449 | 61.9 | 54.9 | 54.2 | 60.6 |
| GSM1345450 | 36.8 | 39.8 | 38.6 | 46.7 |
| GSM1345451 | 60.4 | 66.4 | 62.2 | 74.4 |
| GSM1345452 | 51.0 | 54.0 | 59.3 | 57.9 |
| GSM1345453 | 65.7 | 69.6 | 62.3 | 74.2 |
| GSM1345454 | 69.1 | 70.2 | 70.8 | 77.9 |
| GSM1345455 | 45.1 | 46.9 | 50.5 | 50.9 |
| GSM1345456 | 55.2 | 48.8 | 53.7 | 58.9 |
| GSM1345457 | 53.3 | 52.2 | 51.8 | 55.4 |
| GSM1345458 | 49.4 | 51.2 | 53.7 | 59.9 |
| GSM1345459 | 63.0 | 64.7 | 59.9 | 63.1 |
| GSM1345460 | 35.1 | 40.1 | 39.2 | 46.4 |
| GSM1345461 | 42.5 | 44.7 | 43.7 | 52.6 |
| GSM1345462 | 61.2 | 62.9 | 52.7 | 65.8 |
| GSM1345463 | 50.2 | 50.8 | 50.1 | 59.0 |
| GSM1345464 | 50.3 | 50.5 | 54.2 | 52.4 |
| GSM1345465 | 41.1 | 45.3 | 44.0 | 52.5 |
| GSM1345466 | 72.8 | 75.0 | 68.4 | 79.5 |
| GSM1345467 | 58.6 | 55.8 | 55.8 | 68.1 |
| GSM1345468 | 42.8 | 37.7 | 40.5 | 44.2 |
| GSM1345469 | 59.7 | 65.6 | 63.4 | 75.0 |
| GSM1345470 | 42.4 | 38.1 | 41.2 | 49.3 |
| GSM1345471 | 55.1 | 48.2 | 51.2 | 58.9 |
| GSM1345472 | 53.0 | 52.5 | 51.0 | 62.6 |
| GSM1345473 | 66.7 | 63.3 | 58.7 | 74.6 |
| GSM1345474 | 56.6 | 58.1 | 61.0 | 65.5 |
| GSM1345475 | 47.3 | 41.8 | 53.6 | 49.6 |
| GSM1345476 | 57.8 | 63.1 | 62.4 | 64.9 |
| GSM1345477 | 41.3 | 37.9 | 38.7 | 43.0 |
| GSM1345478 | 51.8 | 53.3 | 55.5 | 60.2 |
| GSM1345479 | 64.6 | 60.4 | 64.3 | 69.3 |
| GSM1345480 | 51.6 | 48.6 | 56.6 | 56.6 |
| GSM1345481 | 55.1 | 58.5 | 54.0 | 57.0 |
| GSM1345482 | 50.9 | 49.3 | 52.1 | 55.4 |
| GSM1345483 | 42.3 | 43.4 | 45.8 | 52.4 |
| GSM1345484 | 65.6 | 68.5 | 63.3 | 69.2 |
| GSM1345485 | 41.7 | 44.9 | 41.5 | 53.0 |
| GSM1345486 | 73.1 | 80.7 | 73.7 | 81.2 |
| GSM1345487 | 67.0 | 70.3 | 65.3 | 80.2 |
| GSM1345488 | 73.2 | 75.9 | 73.7 | 74.8 |
| GSM1345489 | 58.0 | 54.2 | 49.9 | 62.5 |
| GSM1345490 | 49.3 | 55.5 | 54.0 | 59.8 |
| GSM1345491 | 57.4 | 54.0 | 53.3 | 60.0 |
| GSM1345492 | 68.3 | 65.0 | 64.9 | 71.8 |
| GSM1345493 | 47.1 | 45.1 | 47.4 | 50.8 |
| GSM1345494 | 41.5 | 46.3 | 52.5 | 54.9 |
| GSM1345495 | 47.0 | 44.8 | 44.6 | 52.5 |
| GSM1345496 | 39.6 | 38.7 | 42.5 | 49.7 |



|            |      |      |      |      |
|------------|------|------|------|------|
| GSM1345497 | 47.8 | 50.4 | 49.8 | 59.0 |
| GSM1345498 | 42.1 | 42.3 | 46.2 | 52.7 |
| GSM1345499 | 35.1 | 34.3 | 36.5 | 40.4 |
| GSM1345500 | 35.1 | 40.3 | 38.1 | 49.4 |
| GSM1345501 | 50.2 | 49.5 | 46.1 | 60.3 |
| GSM1345502 | 39.8 | 41.1 | 43.7 | 51.4 |
| GSM1345503 | 51.8 | 52.5 | 53.1 | 61.4 |
| GSM1345504 | 43.5 | 48.8 | 44.2 | 55.5 |
| GSM1345505 | 49.5 | 45.6 | 50.6 | 58.0 |
| GSM1345506 | 63.4 | 56.1 | 64.4 | 67.1 |
| GSM1345507 | 35.1 | 34.6 | 31.5 | 44.4 |
| GSM1345508 | 58.8 | 48.0 | 50.0 | 56.9 |
| GSM1345509 | 35.4 | 42.0 | 46.9 | 51.1 |
| GSM1345510 | 39.4 | 38.6 | 43.2 | 48.9 |
| GSM1345511 | 46.7 | 45.2 | 51.6 | 58.2 |
| GSM1345512 | 41.7 | 43.8 | 47.5 | 55.3 |
| GSM1345513 | 60.2 | 65.2 | 68.5 | 67.1 |
| GSM1345514 | 49.5 | 35.8 | 40.7 | 44.9 |
| GSM1345515 | 36.4 | 39.9 | 43.2 | 48.8 |
| GSM1345516 | 57.4 | 52.1 | 54.4 | 60.7 |
| GSM1345517 | 46.6 | 48.1 | 48.2 | 56.0 |
| GSM1345518 | 67.1 | 68.7 | 67.2 | 74.1 |
| GSM1345519 | 49.2 | 49.0 | 55.4 | 51.3 |
| GSM1345520 | 67.2 | 63.3 | 61.4 | 70.4 |
| GSM1345521 | 40.0 | 40.0 | 48.2 | 45.1 |
| GSM1345522 | 59.6 | 60.5 | 58.3 | 64.7 |
| GSM1345523 | 38.9 | 38.5 | 37.4 | 45.9 |
| GSM1345524 | 50.2 | 49.5 | 50.4 | 56.5 |
| GSM1345525 | 37.4 | 33.8 | 41.5 | 44.3 |
| GSM1345526 | 35.3 | 39.3 | 41.3 | 49.9 |
| GSM1345527 | 54.3 | 57.9 | 53.3 | 63.1 |
| GSM1345528 | 51.1 | 49.8 | 58.1 | 63.1 |
| GSM1345529 | 42.6 | 41.3 | 50.2 | 43.9 |
| GSM1345530 | 49.5 | 48.5 | 48.9 | 58.9 |
| GSM1345531 | 41.5 | 39.5 | 43.9 | 45.7 |
| GSM1345532 | 44.7 | 45.4 | 48.3 | 50.1 |
| GSM1345533 | 50.6 | 47.8 | 48.6 | 54.7 |
| GSM1345534 | 35.5 | 31.9 | 42.0 | 45.9 |
| GSM1345535 | 36.6 | 40.7 | 41.6 | 50.3 |
| GSM1345536 | 53.6 | 55.2 | 53.2 | 58.9 |
| GSM1345537 | 50.9 | 49.1 | 52.1 | 61.6 |
| GSM1345538 | 49.4 | 50.7 | 54.1 | 58.1 |
| GSM1345539 | 57.3 | 62.5 | 63.1 | 69.8 |
| GSM1345540 | 65.5 | 71.0 | 69.7 | 74.2 |
| GSM1345541 | 55.4 | 51.7 | 51.4 | 63.2 |
| GSM1345542 | 58.2 | 54.2 | 56.6 | 60.0 |
| GSM1345543 | 69.2 | 74.2 | 71.8 | 79.2 |
| GSM1345544 | 42.5 | 42.2 | 45.0 | 52.8 |
| GSM1345545 | 47.6 | 48.0 | 50.9 | 59.9 |
| GSM1345546 | 46.8 | 45.6 | 48.7 | 56.9 |
| GSM1345547 | 55.7 | 54.6 | 55.9 | 59.7 |
| GSM1345548 | 54.3 | 53.8 | 53.4 | 60.2 |
| GSM1345549 | 60.8 | 62.4 | 60.0 | 72.9 |
| GSM1345550 | 50.3 | 50.7 | 55.7 | 56.6 |
| GSM1345551 | 35.2 | 42.1 | 38.8 | 48.0 |
| GSM1345552 | 71.1 | 65.3 | 66.6 | 79.9 |

|            |      |      |      |      |
|------------|------|------|------|------|
| GSM1345553 | 42.4 | 43.2 | 46.4 | 49.8 |
| GSM1345554 | 60.6 | 62.7 | 60.7 | 70.4 |
| GSM1345555 | 47.8 | 63.3 | 59.8 | 71.4 |
| GSM1345556 | 51.2 | 51.4 | 51.2 | 62.2 |
| GSM1345557 | 65.3 | 64.7 | 64.4 | 66.4 |
| GSM1345558 | 44.0 | 47.8 | 47.0 | 53.7 |
| GSM1345559 | 57.3 | 56.4 | 57.7 | 62.0 |
| GSM1345560 | 70.4 | 71.4 | 66.9 | 75.5 |
| GSM1345561 | 54.9 | 57.0 | 61.3 | 62.3 |
| GSM1345562 | 47.1 | 50.2 | 48.7 | 53.7 |
| GSM1345563 | 43.2 | 48.6 | 50.0 | 51.9 |
| GSM1345564 | 48.5 | 51.4 | 50.9 | 58.4 |
| GSM1345565 | 38.3 | 41.6 | 45.4 | 50.0 |
| GSM1345566 | 36.2 | 41.6 | 40.2 | 49.3 |
| GSM1345567 | 72.2 | 71.9 | 73.4 | 78.6 |
| GSM1345568 | 62.3 | 60.2 | 60.0 | 74.2 |
| GSM1345569 | 60.9 | 57.1 | 56.2 | 67.9 |
| GSM1345570 | 49.9 | 52.6 | 59.1 | 63.6 |
| GSM1345571 | 42.4 | 43.5 | 42.3 | 54.2 |
| GSM1345572 | 38.5 | 43.5 | 48.7 | 55.6 |
| GSM1345573 | 61.1 | 56.0 | 59.0 | 65.4 |
| GSM1345574 | 45.8 | 53.3 | 51.8 | 63.1 |
| GSM1345575 | 50.0 | 53.8 | 56.4 | 57.0 |
| GSM1345576 | 46.7 | 44.7 | 48.5 | 47.3 |
| GSM1345577 | 48.6 | 52.8 | 52.6 | 59.8 |
| GSM1345578 | 42.2 | 43.8 | 42.9 | 51.6 |
| GSM1345579 | 61.7 | 59.3 | 60.9 | 68.3 |
| GSM1345580 | 50.3 | 54.5 | 56.0 | 63.4 |
| GSM1345581 | 53.2 | 50.7 | 52.4 | 64.9 |
| GSM1345582 | 51.8 | 58.0 | 58.0 | 64.2 |
| GSM1345583 | 51.6 | 51.1 | 55.6 | 60.4 |
| GSM1345584 | 43.4 | 44.8 | 45.8 | 51.5 |
| GSM1345585 | 37.9 | 43.0 | 45.4 | 49.9 |
| GSM1345586 | 47.1 | 52.4 | 56.1 | 58.5 |
| GSM1345587 | 62.9 | 64.0 | 58.2 | 69.5 |
| GSM1345588 | 53.3 | 57.6 | 60.0 | 56.9 |
| GSM1345589 | 38.6 | 38.0 | 38.9 | 43.4 |
| GSM1345590 | 36.5 | 34.8 | 41.8 | 43.8 |
| GSM1345591 | 50.6 | 47.8 | 53.5 | 55.7 |
| GSM1345592 | 51.6 | 47.0 | 46.9 | 54.7 |
| GSM1345593 | 39.6 | 40.3 | 42.2 | 48.2 |
| GSM1345594 | 58.5 | 56.7 | 58.0 | 66.4 |
| GSM1345595 | 55.1 | 54.7 | 57.3 | 61.9 |
| GSM1345596 | 50.2 | 50.7 | 50.9 | 55.4 |
| GSM1345597 | 64.1 | 61.4 | 63.3 | 73.2 |
| GSM1345598 | 55.5 | 53.4 | 49.0 | 61.5 |
| GSM1345599 | 36.8 | 38.6 | 37.6 | 45.8 |
| GSM1345600 | 46.8 | 50.3 | 50.8 | 56.7 |
| GSM1345601 | 50.4 | 49.8 | 51.5 | 54.8 |
| GSM1345602 | 52.6 | 53.3 | 54.8 | 60.1 |
| GSM1345603 | 46.7 | 44.2 | 53.2 | 53.8 |
| GSM1345604 | 49.2 | 51.4 | 50.5 | 59.6 |
| GSM1345605 | 51.4 | 49.2 | 56.9 | 62.2 |
| GSM1345606 | 53.7 | 48.2 | 54.4 | 60.1 |
| GSM1345607 | 55.2 | 54.0 | 53.4 | 61.3 |
| GSM1345608 | 45.7 | 48.5 | 54.0 | 61.0 |

|            |      |      |      |      |
|------------|------|------|------|------|
| GSM1345609 | 40.1 | 39.3 | 39.9 | 47.5 |
| GSM1345610 | 44.4 | 42.9 | 47.2 | 50.2 |
| GSM1345611 | 37.3 | 35.3 | 41.0 | 44.9 |
| GSM1345612 | 40.9 | 42.8 | 43.2 | 51.5 |
| GSM1345613 | 54.3 | 48.9 | 53.2 | 59.8 |
| GSM1345614 | 47.9 | 48.9 | 47.1 | 55.5 |
| GSM1345615 | 58.3 | 58.7 | 58.8 | 60.4 |
| GSM1345616 | 35.4 | 38.6 | 40.1 | 45.6 |
| GSM1345617 | 45.0 | 45.1 | 41.3 | 52.3 |
| GSM1345618 | 39.5 | 33.2 | 40.5 | 46.7 |
| GSM1345619 | 52.4 | 53.4 | 56.3 | 62.9 |
| GSM1345620 | 51.9 | 60.8 | 55.9 | 65.0 |
| GSM1345621 | 46.1 | 48.1 | 47.8 | 55.4 |
| GSM1345622 | 44.7 | 48.9 | 54.3 | 52.5 |
| GSM1345623 | 70.1 | 70.4 | 64.7 | 76.3 |
| GSM1345624 | 45.3 | 48.4 | 46.6 | 57.6 |
| GSM1345625 | 62.5 | 61.3 | 60.2 | 61.8 |
| GSM1345626 | 58.5 | 60.1 | 62.0 | 64.1 |
| GSM1345627 | 46.9 | 51.4 | 53.6 | 56.0 |
| GSM1345628 | 37.2 | 39.2 | 44.3 | 41.4 |
| GSM1345629 | 40.7 | 40.7 | 45.2 | 48.1 |
| GSM1345630 | 35.1 | 37.9 | 39.8 | 45.2 |
| GSM1345631 | 53.0 | 57.6 | 54.8 | 59.5 |
| GSM1345632 | 55.5 | 59.3 | 58.1 | 60.9 |
| GSM1345633 | 46.2 | 43.7 | 44.7 | 53.5 |
| GSM1345634 | 46.8 | 48.7 | 47.5 | 57.1 |
| GSM1345635 | 62.5 | 64.5 | 56.9 | 67.1 |
| GSM1345636 | 43.8 | 47.4 | 47.9 | 55.9 |
| GSM1345637 | 44.8 | 46.3 | 52.1 | 54.9 |
| GSM1345638 | 59.7 | 59.3 | 62.6 | 66.5 |
| GSM1345639 | 52.1 | 53.1 | 50.6 | 62.0 |
| GSM1345640 | 65.4 | 62.6 | 58.6 | 63.8 |
| GSM1345641 | 35.1 | 38.5 | 40.1 | 39.8 |
| GSM1345642 | 47.3 | 50.1 | 48.7 | 56.9 |
| GSM1345643 | 42.9 | 44.0 | 43.0 | 45.6 |
| GSM1345644 | 42.1 | 41.7 | 48.9 | 47.7 |
| GSM1345645 | 47.9 | 50.9 | 56.9 | 61.2 |
| GSM1345646 | 48.6 | 46.6 | 42.8 | 53.3 |
| GSM1345647 | 51.6 | 56.8 | 60.4 | 65.6 |
| GSM1345648 | 35.3 | 36.1 | 41.1 | 42.9 |
| GSM1345649 | 36.6 | 42.0 | 40.1 | 42.1 |
| GSM1345650 | 43.6 | 43.6 | 45.8 | 53.0 |
| GSM1345651 | 44.9 | 48.9 | 52.9 | 58.4 |
| GSM1345652 | 46.9 | 48.6 | 43.2 | 49.9 |
| GSM1345653 | 44.1 | 48.4 | 46.6 | 56.1 |
| GSM1345654 | 62.3 | 67.2 | 66.6 | 69.2 |
| GSM1345655 | 41.3 | 43.3 | 49.5 | 52.9 |
| GSM1345656 | 37.7 | 40.2 | 47.0 | 45.4 |
| GSM1345657 | 39.6 | 36.3 | 39.2 | 43.5 |
| GSM1345658 | 54.1 | 59.9 | 51.9 | 64.6 |
| GSM1345659 | 35.2 | 37.4 | 35.6 | 46.0 |
| GSM1345660 | 48.8 | 48.8 | 50.6 | 55.9 |
| GSM1345661 | 67.1 | 69.8 | 67.1 | 72.7 |
| GSM1345662 | 54.2 | 53.9 | 58.6 | 61.2 |
| GSM1345663 | 38.2 | 37.5 | 39.0 | 44.4 |
| GSM1345664 | 58.3 | 54.4 | 54.9 | 57.4 |

|            |      |      |      |      |
|------------|------|------|------|------|
| GSM1345665 | 44.8 | 42.6 | 47.6 | 55.6 |
| GSM1345666 | 60.8 | 63.2 | 57.2 | 62.2 |
| GSM1345667 | 45.1 | 46.8 | 53.6 | 51.4 |
| GSM1345668 | 56.0 | 55.1 | 54.4 | 60.1 |
| GSM1345669 | 48.0 | 48.3 | 52.1 | 56.2 |
| GSM1345670 | 45.5 | 42.8 | 45.2 | 51.4 |
| GSM1345671 | 39.3 | 41.0 | 43.6 | 49.4 |
| GSM1345672 | 49.5 | 55.8 | 55.8 | 65.8 |
| GSM1345673 | 61.5 | 61.0 | 56.7 | 63.5 |
| GSM1345674 | 47.7 | 52.1 | 51.2 | 57.6 |
| GSM1345675 | 50.5 | 49.3 | 52.0 | 57.0 |
| GSM1345676 | 63.9 | 68.0 | 69.3 | 70.7 |
| GSM1345677 | 37.9 | 45.3 | 43.8 | 52.8 |
| GSM1345678 | 35.2 | 38.2 | 40.8 | 49.0 |
| GSM1345679 | 35.5 | 35.9 | 36.3 | 37.6 |
| GSM1345680 | 35.9 | 42.7 | 44.7 | 47.2 |
| GSM1345681 | 51.3 | 51.9 | 55.2 | 57.6 |
| GSM1345682 | 45.3 | 43.7 | 44.6 | 53.7 |
| GSM1345683 | 50.6 | 56.2 | 56.9 | 60.2 |
| GSM1345684 | 52.7 | 52.2 | 51.4 | 57.8 |
| GSM1345685 | 44.3 | 46.4 | 45.5 | 54.4 |
| GSM1345686 | 46.4 | 46.7 | 48.1 | 58.7 |
| GSM1345687 | 39.5 | 41.4 | 43.8 | 45.0 |
| GSM1345688 | 52.5 | 54.0 | 51.8 | 57.7 |
| GSM1345689 | 52.0 | 50.6 | 55.1 | 59.0 |
| GSM1345690 | 37.3 | 36.1 | 43.9 | 48.4 |
| GSM1345691 | 54.6 | 52.9 | 54.8 | 64.3 |
| GSM1345692 | 55.8 | 57.7 | 51.7 | 64.3 |
| GSM1345693 | 59.7 | 61.1 | 63.8 | 69.6 |
| GSM1345694 | 40.1 | 41.0 | 38.4 | 46.0 |
| GSM1345695 | 45.6 | 48.7 | 54.7 | 55.1 |
| GSM1345696 | 47.4 | 43.6 | 48.2 | 53.6 |
| GSM1345697 | 63.7 | 67.4 | 62.9 | 70.9 |
| GSM1345698 | 43.1 | 47.2 | 50.6 | 58.6 |
| GSM1345699 | 60.3 | 66.9 | 60.7 | 72.3 |
| GSM1345700 | 57.9 | 55.6 | 56.2 | 62.3 |
| GSM1345701 | 57.0 | 51.8 | 52.7 | 64.0 |
| GSM1345702 | 53.1 | 53.4 | 60.8 | 63.4 |
| GSM1345703 | 42.0 | 42.3 | 47.4 | 53.9 |
| GSM1345704 | 68.0 | 61.4 | 67.5 | 74.0 |
| GSM1345705 | 49.3 | 50.6 | 48.0 | 59.0 |
| GSM1345706 | 52.8 | 55.0 | 60.2 | 64.2 |
| GSM1345707 | 47.6 | 52.3 | 47.2 | 61.3 |
| GSM1345708 | 52.3 | 49.8 | 49.7 | 61.6 |
| GSM1345709 | 43.0 | 40.1 | 43.5 | 53.8 |
| GSM1345710 | 39.8 | 40.0 | 42.2 | 49.4 |
| GSM1345711 | 38.2 | 43.0 | 40.9 | 51.0 |
| GSM1345712 | 61.6 | 62.5 | 62.5 | 71.8 |
| GSM1345713 | 58.0 | 63.5 | 65.3 | 77.5 |
| GSM1345714 | 40.1 | 41.7 | 39.0 | 46.6 |
| GSM1345715 | 55.8 | 60.3 | 56.2 | 64.2 |
| GSM1345716 | 61.6 | 61.5 | 64.2 | 72.3 |
| GSM1345717 | 48.7 | 47.1 | 48.4 | 54.4 |
| GSM1345718 | 62.7 | 55.5 | 52.3 | 63.2 |
| GSM1345719 | 74.6 | 72.2 | 61.3 | 83.6 |
| GSM1345720 | 47.4 | 43.7 | 45.8 | 53.4 |

|            |      |      |      |      |
|------------|------|------|------|------|
| GSM1345721 | 57.9 | 58.4 | 56.3 | 63.5 |
| GSM1345722 | 58.0 | 62.5 | 63.7 | 80.4 |
| GSM1345723 | 63.7 | 67.0 | 58.6 | 68.2 |
| GSM1345724 | 52.8 | 56.5 | 58.8 | 60.2 |
| GSM1345725 | 54.6 | 52.4 | 55.5 | 63.6 |
| GSM1345726 | 43.0 | 45.3 | 45.8 | 55.2 |
| GSM1345727 | 72.9 | 72.5 | 70.6 | 77.7 |
| GSM1345728 | 63.6 | 64.6 | 64.3 | 70.5 |
| GSM1345729 | 53.7 | 52.6 | 53.2 | 60.5 |
| GSM1345730 | 43.0 | 41.7 | 40.2 | 53.9 |
| GSM1345731 | 38.2 | 43.3 | 39.3 | 51.1 |
| GSM1345732 | 60.3 | 65.2 | 66.1 | 67.7 |
| GSM1345733 | 68.0 | 60.1 | 65.4 | 70.5 |
| GSM1345734 | 57.0 | 51.9 | 54.4 | 63.8 |
| GSM1345735 | 37.3 | 36.9 | 46.3 | 49.2 |
| GSM1345736 | 53.7 | 50.2 | 51.6 | 60.2 |
| GSM1345737 | 64.4 | 66.0 | 67.1 | 72.7 |
| GSM1345738 | 43.1 | 47.1 | 53.1 | 55.1 |
| GSM1345739 | 52.0 | 57.5 | 53.5 | 58.9 |
| GSM1345740 | 42.0 | 43.2 | 47.8 | 52.4 |
| GSM1345741 | 64.4 | 64.4 | 65.5 | 71.8 |
| GSM1345742 | 72.9 | 74.9 | 66.1 | 78.2 |
| GSM1345743 | 74.6 | 71.1 | 55.9 | 81.7 |
| GSM1345744 | 49.3 | 53.1 | 51.6 | 61.9 |
| GSM1345745 | 52.5 | 47.2 | 45.0 | 58.8 |
| GSM1345746 | 49.3 | 52.4 | 54.6 | 58.5 |
| GSM1345747 | 48.7 | 48.0 | 48.9 | 55.0 |
| GSM1345748 | 52.5 | 48.2 | 49.6 | 60.6 |
| GSM1345749 | 53.1 | 53.7 | 59.5 | 64.4 |
| GSM1345750 | 45.6 | 45.6 | 51.8 | 54.9 |
| GSM1345751 | 59.9 | 59.2 | 58.5 | 69.1 |
| GSM1345752 | 59.9 | 60.9 | 55.2 | 69.1 |
| GSM1345753 | 39.8 | 38.1 | 42.2 | 48.7 |
| GSM1345754 | 62.7 | 55.0 | 50.2 | 61.4 |
| GSM1345755 | 59.7 | 64.0 | 63.2 | 70.3 |
| GSM1345756 | 43.0 | 46.7 | 47.6 | 52.9 |
| GSM1345757 | 49.3 | 47.8 | 51.5 | 59.5 |
| GSM1345758 | 52.3 | 51.2 | 51.8 | 59.7 |
| GSM1345759 | 63.6 | 62.8 | 67.2 | 68.0 |
| GSM1345760 | 47.6 | 54.1 | 49.8 | 61.0 |

- 
1. Horvath, S. (2013) DNA methylation age of human tissues and cell types. *Genome Biol*, 14, R115.
  2. Hannum, G., Guinney, J., Zhao, L., Zhang, L., Hughes, G., Sada, S., Klotzle, B., Bibikova, M., Fan, J.B., Gao, Y. et al. (2013) Genome-wide methylation profiles reveal quantitative views of human aging rates. *Mol Cell*, 49, 359-367.
